# Supplementary material for: Global biogeography of SAR11 marine bacteria
Source: PubMed Central journal article supplement — Mol Syst Biol. 2012 Jul 17;8:595. doi: 10.1038/msb.2012.28 (PMC3421443; doi:10.1038/msb.2012.28), 2012-07-17
Supplement: msb201228-s1.pdf [file msb201228-s1.pdf]

## Supporting Information

### Table of Contents

**Figure S1** ARB neighbour joining trees of SAR11 16S rRNA gene sequences and internal transcribed spacer (ITS) regions. Separate tree files for this figure are provided:

Supplementary\_Figure\_S1\_ITS\_full\_MSB.tree; Supplementary\_Figure\_S1\_16S\_MSB.tree;

Supplementary\_Figure\_S1\_ITS\_concise\_MSB.tree

**Figure S2** Normalised distribution of blast hits from genome-specific genes within metagenomes from polar, temperate and tropical biomes.

**Figure S3** Shifts in sea surface temperature predicted from IPCC climate models.

**Table S1** Source of sequences making up the SAR11 ITS database.

**Table S2** Metagenome sample sets used in this study.

**Table S3** Environmental data associated with metagenomes used in this study.

**Table S4** Results of DISTLM fitting environmental data to relative abundances of SAR11 phylotypes in 128 surface marine metagenome samples.

**Table S5** Specific genes, paralogous genes, and genes with signatures of positive selection in ACE\_P1a.1, ACE\_P3.2, and IMCC9063 genomes.

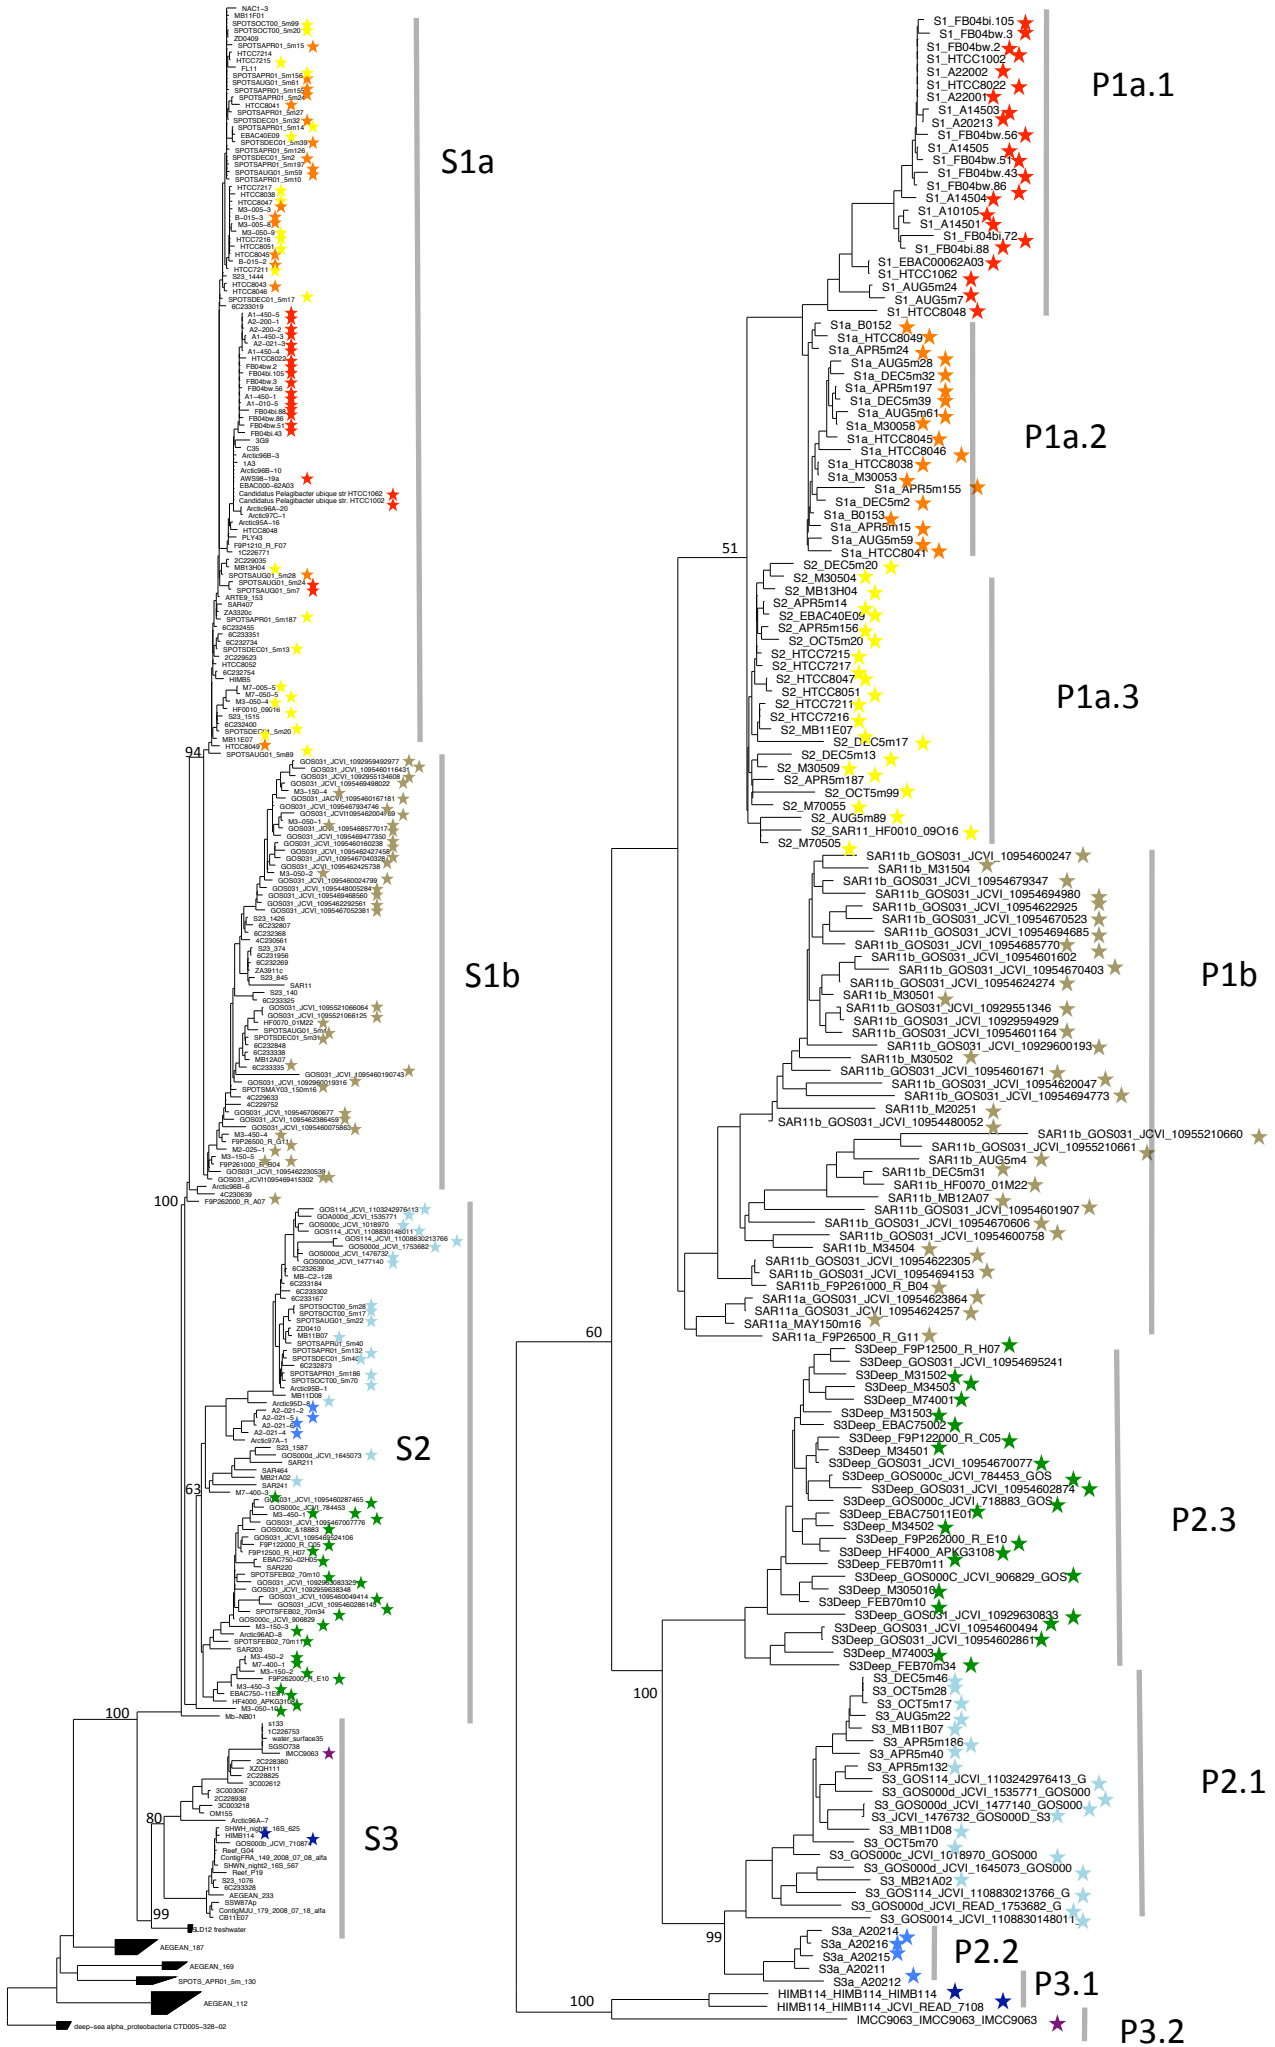

S1\_FB04bi.105  
S1\_FB04bi.131  
S1\_231\_Clade1  
S1\_FB04bi.101  
S1\_FB04bi.32  
S1\_FB04bi.55  
S1\_FB04bi.90  
S1\_G50120  
S1\_A10104  
S1\_G50133  
S1\_G50092  
S1\_A14503  
S1\_A20213  
S1\_G50163  
S1\_A22001  
S1\_A22002  
S1\_A22003  
S1\_G50001  
S1\_G50110  
S1\_G50117  
S1\_G50152  
S1\_HTCC1002  
S1\_HTCC8010  
S1\_HTCC8022  
S1\_FB04bi.125  
S1\_FB04bi.34  
S1\_FB04bi.89  
S1\_FB04bi.94  
S1\_FB04bi.91  
S1\_FB04bw.2  
S1\_FB04bw.44  
S1\_FB04bi.35  
S1\_FB04bw.3  
S1\_FB04bw.59  
S1\_FB04bw.41  
S1\_FB04bi.46  
S1\_FB04bi.115  
S1\_FB04bi.96  
S1\_FB04bi.77  
S1\_FB04bw.67  
S1\_G50027  
S1\_A14505  
S1\_G50059  
S1\_FB04bi.102  
S1\_FB04bi.79  
S1\_FB04bw.27  
S1\_FB04bw.51  
S1\_FB04bi.21  
S1\_G500182  
S1\_G5000115  
S1\_G50093  
S1\_G50209  
S1\_G500212  
S1\_G50101  
S1\_G5000119  
S1\_G50031  
S1\_G500012  
S1\_G500017  
S1\_G50081  
S1\_G50186  
S1\_FB04bi.80  
S1\_FB04bi.134  
S1\_G500213  
S1\_FB04bi.38  
S1\_FB04bi.71  
S1\_G50011  
S1\_G50096  
S1\_G500072  
S1\_G5000110  
S1\_G50062  
S1\_FB04bi.67  
S1\_G5000121  
S1\_G50014  
S1\_G500013  
S1\_G500214  
S1\_FB04bi.52  
S1\_FB04bi.60  
S1\_F9P1210\_R\_F07  
S1\_G5000112  
S1\_FB04bi.127  
S1\_FB04bi.141  
S1\_FB04bw.46  
S1\_G50007  
S1\_FB04bw.56  
S1\_FB04bw.79  
S1\_G50216  
S1\_A10101  
S1\_FB04bw.89  
S1\_G50077  
S1\_G50247  
S1\_G500014  
S1\_G50065  
S1\_FB04bw.40  
S1\_A14504  
S1\_FB04bi.122  
S1\_FB04bw.47  
S1\_G5000117  
S1\_G500016  
S1\_FB04bi.37  
S1\_G50083  
S1\_G50148  
S1\_APR5m175  
S1\_FB04bi.74  
S1\_FB04bi.43  
S1\_JuI5m5  
S1\_G2K279  
S1\_G5000120  
S1\_G50043  
S1\_G50142  
S1\_G50295  
S1\_FB04bi.100  
S1\_FB04bi.99  
S1\_FB04bi.98  
S1\_FB04bi.18  
S1\_FB04bi.19  
S1\_APR14m121  
S1\_G50056  
S1\_G50226  
S1\_G500015  
S1\_G500073  
S1\_G500142  
S1\_G500019  
S1\_FB04bi.130  
S1\_G50018  
S1\_G50079  
S1\_G50172  
S1\_A10102  
S1\_FB04bi.10  
S1\_G50158  
S1\_G50121  
S1\_FB04bi.118  
S1\_FB04bi.85  
S1\_FB04bi.40  
S1\_FB04bi.69  
S1\_G50036  
S1\_FB04bi.106  
S1\_FB04bi.128  
S1\_G50097  
S1\_FB04bi.137  
S1\_FB04bw.86  
S1\_FB04bi.26  
S1\_FB04bi.11  
S1\_FB04bi.54  
S1\_FB04bw.81  
S1\_G50070  
S1\_G50173  
S1\_A10103  
S1\_G500074  
S1\_G50197  
S1\_G50217  
S1\_G5000116  
S1\_G50090

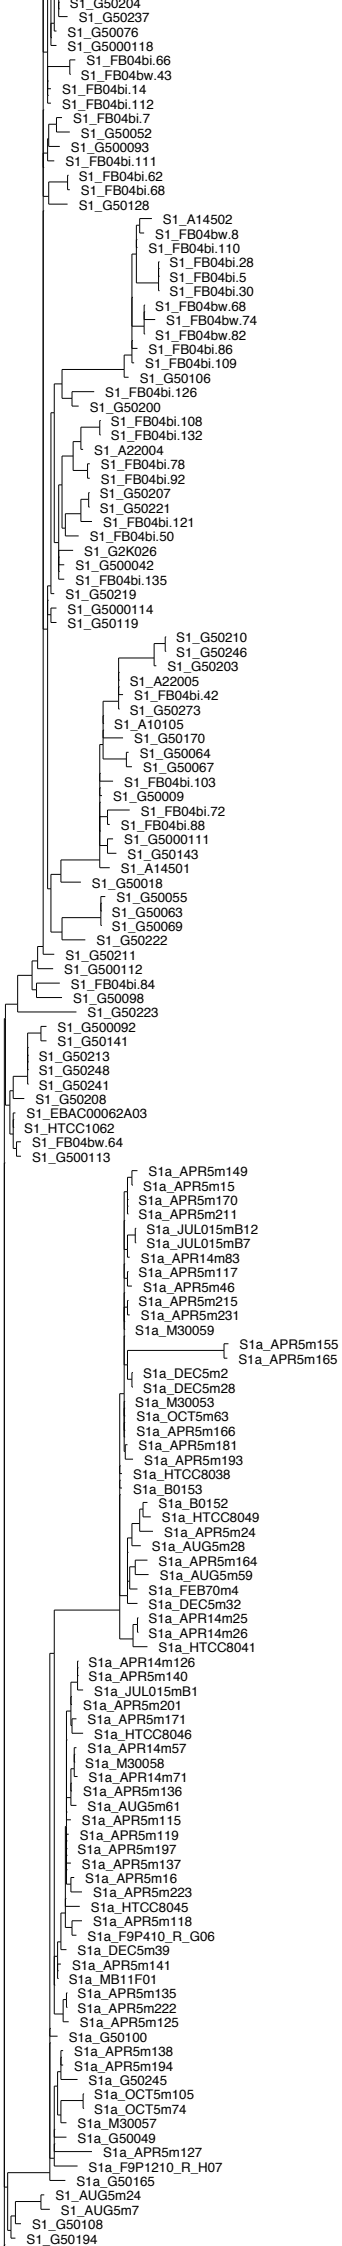

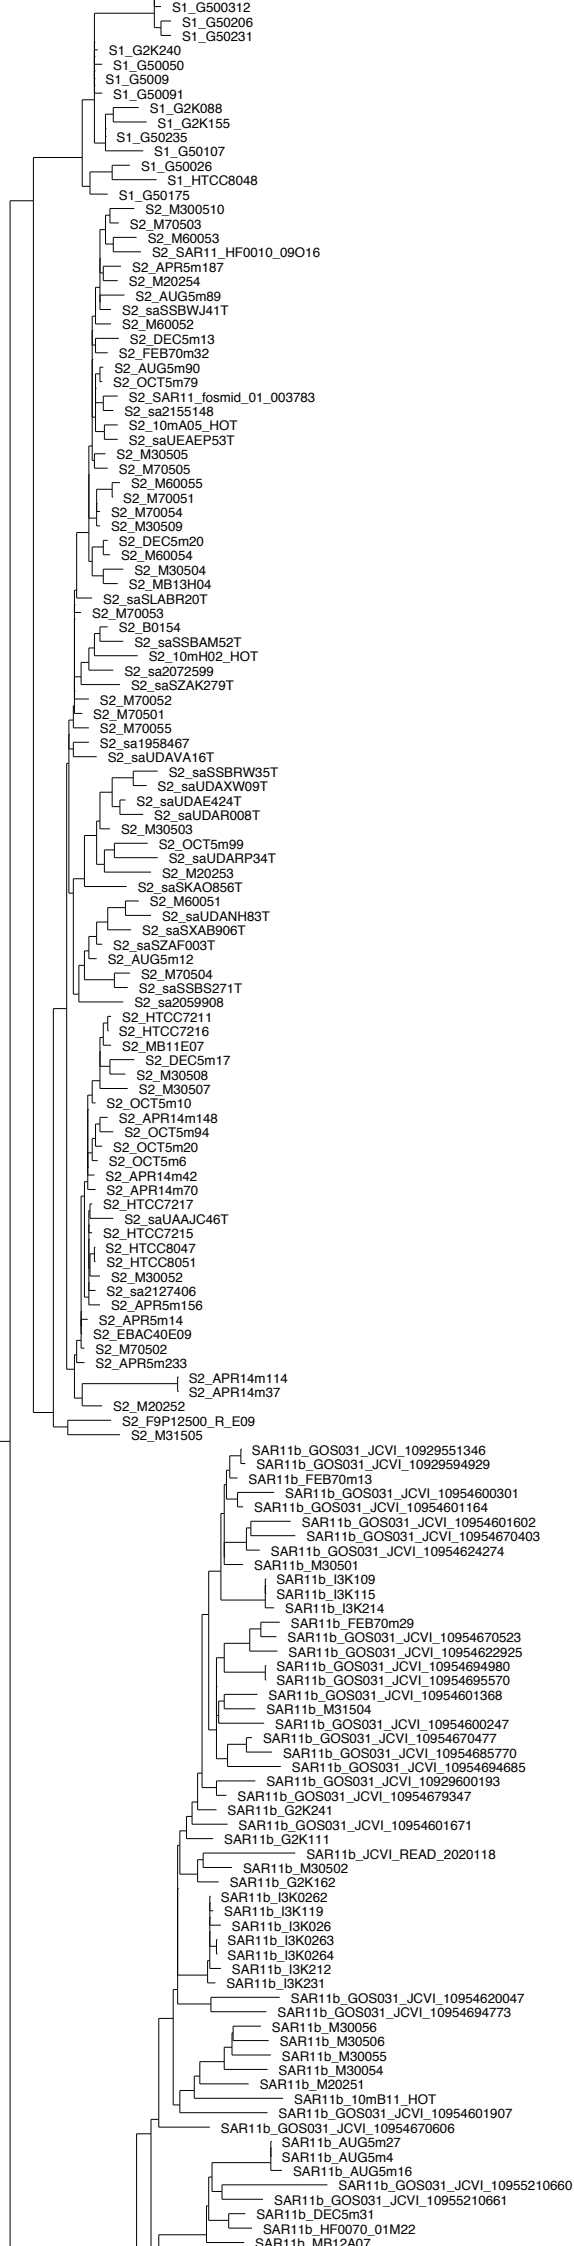

SAR11b\_JCVI\_READ\_685147

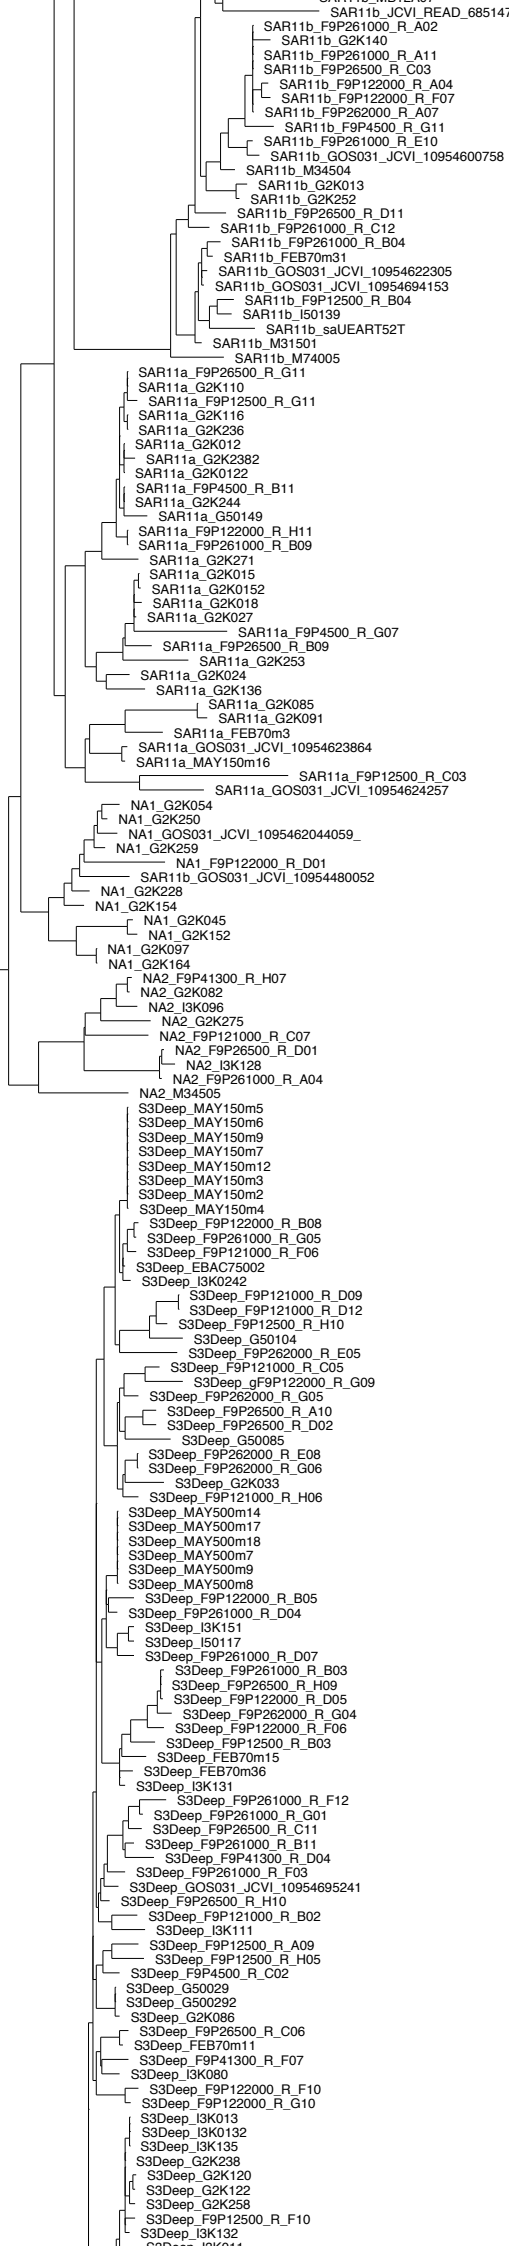

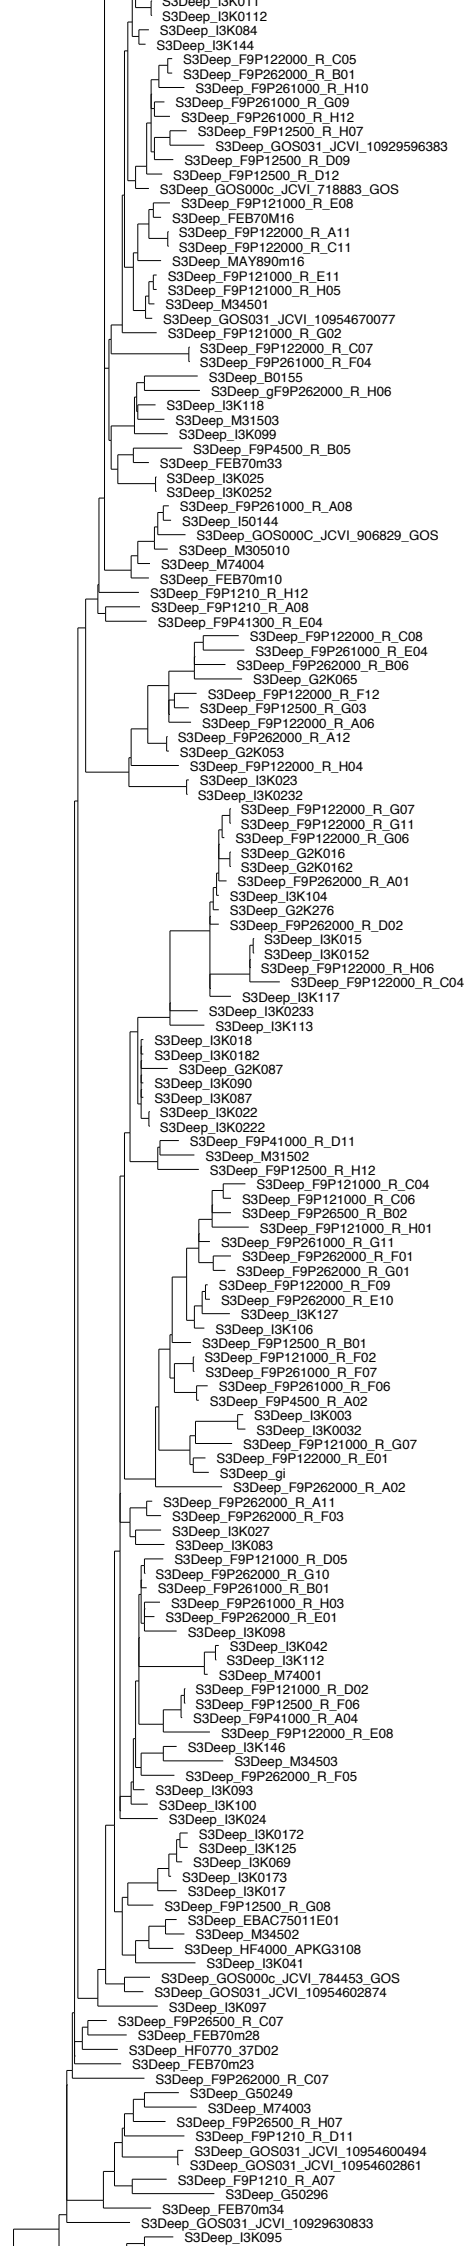

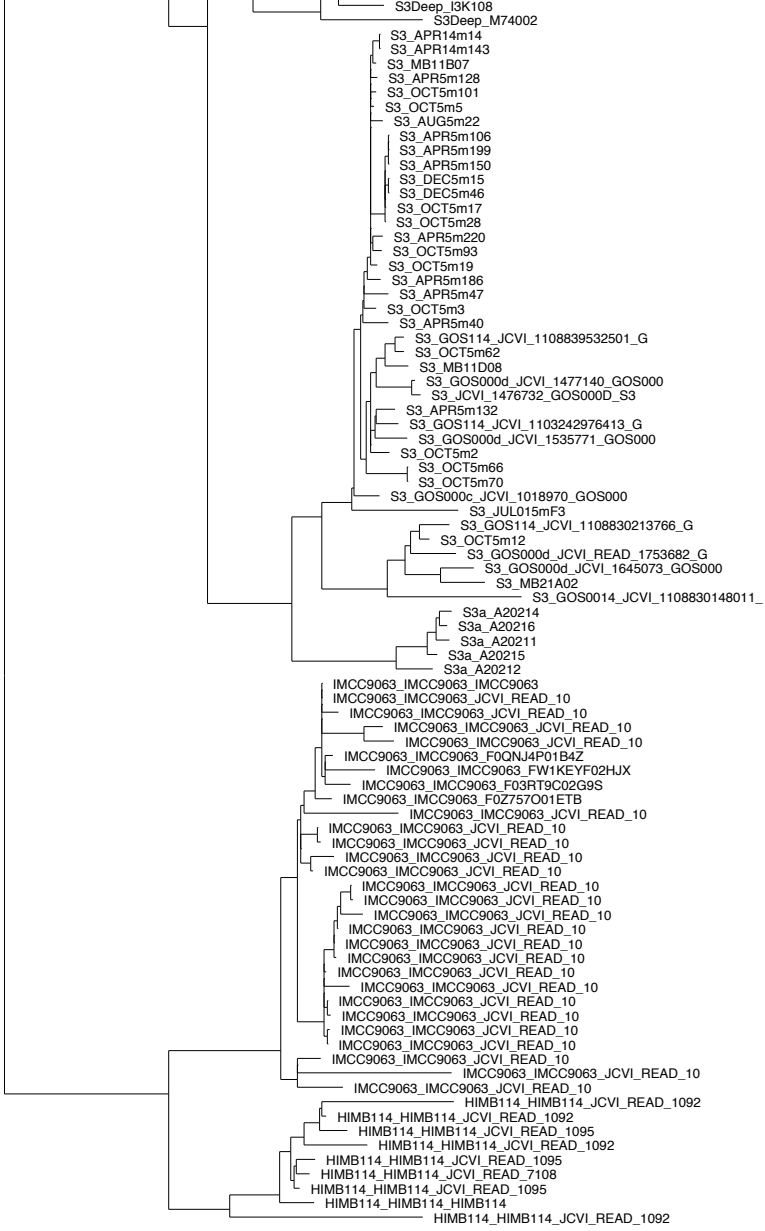



**Figure S1** ARB neighbour joining trees of SAR11 16S rRNA gene sequences and internal transcribed spacer (ITS) regions. Top panel: Comparison of ARB neighbour joining trees generated from 16S rRNA gene sequences (left) and ITS regions (right) from clones which contain both regions. Bootstrap values >50% are shown. Bottom panel: ARB neighbour joining tree generated from all 865 ITS sequences used to compile the database.

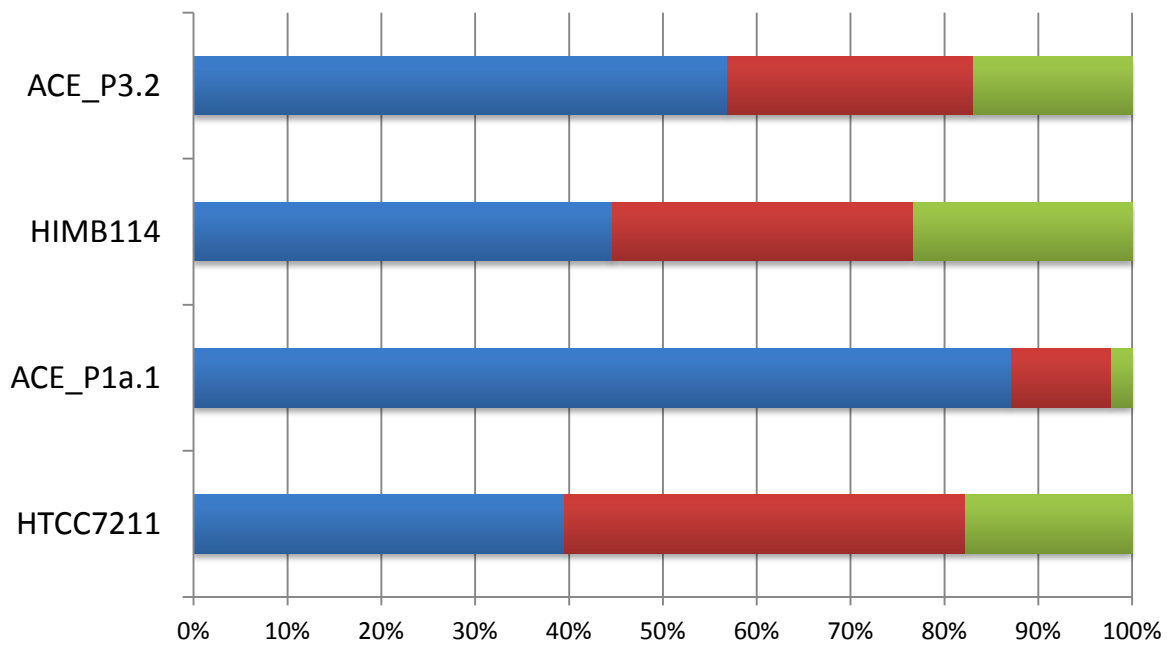

**Figure S2** Normalised distribution of blast hits from genome-specific genes within metagenomes from polar, temperate and tropical biomes. The normalized distribution was calculated by dividing the number of genome-specific protein hits to each biome by the total number of hits to all biomes. Polar <10°C (blue), temperate 10-20°C (green), tropical >20°C (red).

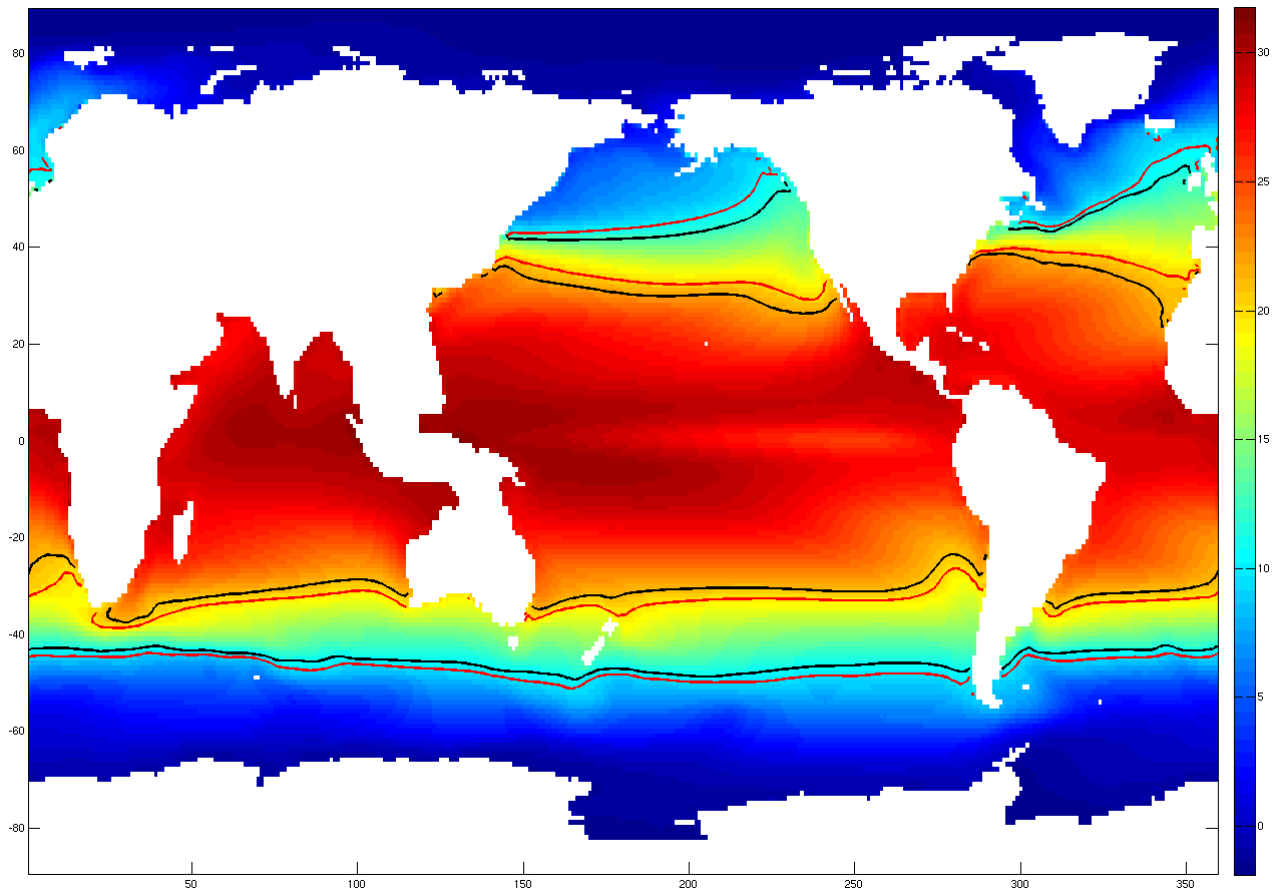

**Figure S3** Shifts in sea surface temperature predicted from IPCC climate models. Changes in the location of the 10°C and 20°C sea surface temperature isotherms from 1990 (black) and 2090 (red) calculated as a multi-model mean from 15 IPCC models.

**Table S1.** Source of sequences making up the SAR11 ITS database.

| Source                     | Location                                                 | Depth (m)         | Latitude   | Longitude  | No. of sequences |
|----------------------------|----------------------------------------------------------|-------------------|------------|------------|------------------|
| <b>P1a.1</b>               |                                                          |                   |            |            |                  |
| ACE lake                   | Antarctic continent                                      | 11.5              | 68 28.33S  | 78 11.29E  | 1                |
| Antarctic seawater         | Antarctic near ice shelf between Scotia and Weddell seas | 10                | 60 31.111S | 48 18.788W | 5                |
| Antarctic seawater         | Antarctic near ice shelf between Scotia and Weddell seas | 450               | 60 31.111S | 48 18.788W | 5                |
| Antarctic seawater         | Antarctic ocean off the Antarctic Peninsula              | 21                | 63 24.5S   | 56 40.717W | 1                |
| Antarctic seawater         | Antarctic ocean off the Antarctic Peninsula              | 200               | 63 24.5S   | 56 40.717W | 5                |
| Temperate Coastal seawater | San Pedro Ocean Time Series, California                  | 14                | 33 33N     | 118 24W    | 1                |
| Temperate Coastal seawater | San Pedro Ocean Time Series, California                  | 5                 | 33 33N     | 118 24W    | 4                |
| Temperate Coastal seawater | Monterey Bay, California                                 | 5                 |            |            | 1                |
| Sub-arctic seawater        | North subarctic Pacific seawater                         | 500               | 48.97 N    | 130.67 W   | 1                |
| Arctic sea ice             | Franklin Bay                                             | 0.025             | 70.0N      | 126.3W     | 74               |
| Arctic sea water           | Franklin Bay                                             | under ice surface | 70.0N      | 126.3W     | 23               |
| Arctic sea water           | North Atlantic, Greenland Sea                            | 2000              | 72.9N      | 4.7E       | 5                |
| Arctic sea water           | North Atlantic, Greenland Sea                            | 50                | 72.9N      | 4.7E       | 120              |
| Temperate Coastal seawater | Oregon                                                   |                   |            |            | 5                |
|                            |                                                          |                   |            |            |                  |
| <b>P1a.2</b>               |                                                          |                   |            |            |                  |
| Temperate Coastal seawater | San Pedro Ocean Time Series, California                  | 14                | 33 33N     | 118 24W    | 6                |
| Temperate Coastal seawater | San Pedro Ocean Time Series, California                  | 5                 | 33 33N     | 118 24W    | 46               |
| Temperate Coastal seawater | Gulf of Biscay pff Cudellero (Spain)                     | 15                | 43 42N     | 6 09W      | 2                |
| Sub-arctic seawater        | North subarctic Pacific seawater                         | 500               | 48.97N     | 13.67W     | 1                |
| Sub-arctic seawater        | North subarctic Pacific seawater                         | 500               | 48.65N     | 126.67W    | 1                |
| Temperate Coastal seawater | San Pedro Ocean Time Series, California                  | 70                | 33 33N     | 118 24W    | 1                |
| Arctic sea water           | North Atlantic, Greenland Sea                            | 50                | 72.9N      | 4.7E       | 4                |

|                            |                                                          |     |            |           |    |
|----------------------------|----------------------------------------------------------|-----|------------|-----------|----|
| Temperate Coastal seawater | Oregon coast                                             |     |            |           | 5  |
| Mediterranean seawater     | Mediterranean off Malaga                                 | 5   | 36 14.610N | 4 15.260W | 4  |
| Temperate Coastal seawater | Monterey Bay, California                                 | 5   | 35.44 N    | 124.89 W  | 1  |
|                            |                                                          |     |            |           |    |
| <b>P1a.3</b>               |                                                          |     |            |           |    |
| Sub-tropical seawater      | Hawaiian Ocean Time Series                               | 10  | 25 45N     | 158W      | 3  |
| Temperate Coastal seawater | San Pedro Ocean Time Series, California                  | 14  | 33 33N     | 118 24W   | 5  |
| Temperate Coastal seawater | San Pedro Ocean Time Series, California                  | 5   | 33 33N     | 118 24W   | 16 |
| Temperate Coastal seawater | Gulf of Biscay pff Cudellero (Spain)                     | 15  | 43 42N     | 6 09W     | 1  |
| Temperate Coastal seawater | Monterey Bay, California                                 | 5   | 36.78N     | 122.48W   | 1  |
| Sub-arctic seawater        | North subarctic Pacific seawater                         | 500 | 48.97 N    | 130.67 W  | 1  |
| Temperate Coastal seawater | San Pedro Ocean Time Series, California                  | 70  | 33 33N     | 118 24W   | 1  |
| Sub-tropical seawater      | Sargasso Sea                                             |     |            |           | 4  |
| Temperate Coastal seawater | Oregon coast                                             |     |            |           | 2  |
| Mediterranean seawater     | Mediterranean off Almunecar (Spain)                      | 25  | 36 42.904N | 3 44.444W | 3  |
| Mediterranean seawater     | Mediterranean off Malaga (Spain)                         | 5   | 36 14.610N | 4 15.260W | 1  |
| Mediterranean seawater     | Mediterranean off Malaga (Spain)                         | 50  | 36 14.610N | 4 15.260W | 7  |
| Mediterranean seawater     | Mediterranean off Malaga (Spain)                         | 150 | 36 14.610N | 4 15.260W | 1  |
| Mediterranean seawater     | Transect from Barcelona to Majorca (Spain) Slope         | 5   | 41 08.760N | 2 28.010E | 5  |
| Mediterranean seawater     | Transect from Barcelona to Majorca (Spain) Abyssal plain | 5   | 40 40.270N | 2 51.980E | 5  |
| Mediterranean seawater     | Transect from Barcelona to Majorca (Spain) Abyssal plain | 50  | 40 40.270N | 2 51.980E | 5  |
| Temperate Coastal seawater | Monterey Bay, California                                 | 5   | 35.44N     | 124.89W   | 1  |
| Temperate Coastal seawater | Monterey Bay, California                                 | 5   |            |           | 1  |
| Sub-tropical seawater      | Sargasso Sea, Bermuda Atlantic Time Series               | 5   | 32 10N     | 64 30W    | 22 |
| Temperate Coastal seawater | Western Channel Observatory, Plymouth                    | 5   | 50.25N     | 4.212W    | 1  |

|                                       |                                                          |      |            |           |    |
|---------------------------------------|----------------------------------------------------------|------|------------|-----------|----|
|                                       |                                                          |      |            |           |    |
| <b>P1b</b>                            |                                                          |      |            |           |    |
| Sub-tropical seawater                 | Hawaiian Ocean Time Series                               | 10   | 25 45N     | 158W      | 2  |
| Mediterranean Seawater                | Ionian Sea                                               | 3000 | 36.50N     | 15.83E    | 11 |
| Mediterranean Seawater                | Ionian Sea                                               | 50   | 36.50N     | 15.83E    | 1  |
| Mediterranean seawater                | Mediterranean off Almunecar (Spain)                      | 25   | 36 42.904N | 3 44.444W | 1  |
| Mediterranean Seawater                | Mediterranean off Malaga (Spain)                         | 5    | 36 14.610N | 4 15.260W | 3  |
| Mediterranean Seawater                | Mediterranean off Malaga (Spain)                         | 50   | 36 14.610N | 4 15.260W | 3  |
| Mediterranean Seawater                | Mediterranean off Malaga (Spain)                         | 150  | 36 14.610N | 4 15.260W | 2  |
| Mediterranean Seawater                | Mediterranean off Malaga (Spain)                         | 450  | 36 14.610N | 4 15.260W | 1  |
| Temperate Coastal seawater            | Monterey Bay, California                                 |      | 35.44 N    | 124.89 W  | 1  |
| Arctic sea water                      | North Atlantic, Greenland Sea                            | 2000 | 72.9N      | 4.7E      | 25 |
| Sub-arctic seawater                   | North subarctic Pacific seawater                         | 500  | 48.97 N    | 130.67 W  | 6  |
| Sub-arctic seawater                   | North subarctic Pacific seawater                         | 500  | 50.00 N    | 145.00 W  | 12 |
| Sub-arctic seawater                   | North subarctic Pacific seawater                         | 500  | 48.65 N    | 126.67 W  | 3  |
| Temperate Coastal seawater            | San Pedro Ocean Time Series, California                  | 5    | 33 33N     | 118 24W   | 5  |
| Temperate Coastal seawater            | San Pedro Ocean Time Series, California                  | 70   | 33 33N     | 118 24W   | 3  |
| Sub-tropical seawater                 | Sargasso Sea, Bermuda Atlantic Time Series               |      | 32.174835  | -64.01017 | 2  |
| Sub-tropical seawater                 | Sargasso Sea, Bermuda Atlantic Time Series               | 5    | 32 10N     | 64 30W    | 1  |
| Mediterranean seawater                | Transect from Barcelona to Majorca (Spain) Abyssal plain | 400  | 40 40.270N | 2 51.980E | 1  |
| Tropical seawater - coastal upwelling | Upwelling, Fernandina Island                             | 12   | -0.3011111 | 91.651665 | 30 |
| Sub-arctic seawater                   | North subarctic Pacific seawater                         | 500  | 48.97 N    | 130.67 W  | 3  |
| Sub-arctic seawater                   | North subarctic Pacific seawater                         | 500  | 50.00 N    | 145.00 W  | 3  |
| Sub-arctic seawater                   | North subarctic Pacific seawater                         | 500  | 48.65 N    | 126.67 W  | 2  |
| Temperate Coastal seawater            | San Pedro Ocean Time Series, California                  | 70   | 33 33N     | 118 24W   | 1  |
| Arctic sea water                      | North Atlantic,                                          | 2000 | 72.9N      | 4.7E      | 18 |



|                                       |                                                     |      |            |            |    |
|---------------------------------------|-----------------------------------------------------|------|------------|------------|----|
|                                       | Greenland Sea                                       |      |            |            |    |
| Arctic sea water                      | North Atlantic, Greenland Sea                       | 50   | 72.9N      | 4.7E       | 1  |
| Tropical seawater - coastal upwelling | Upwelling, Fernandina Island                        | 12   | -0.3011111 | 91.651665  | 2  |
| Temperate Coastal seawater            | San Pedro Ocean Time Series, California             | 150  | 33 33N     | 118 24W    | 2  |
| <b>P2.1</b>                           |                                                     |      |            |            |    |
| Tropical seawater                     | 00 Miles west of the Seychelles in the Indian Ocean | 5    | -4.990278  | 64.97667   | 3  |
| Temperate Coastal seawater            | Monterey Bay, California                            |      | 35.44N     | 124.89W    | 3  |
| Temperate Coastal seawater            | San Pedro Ocean Time Series, California             | 14   | 33 33N     | 118 24W    | 2  |
| Temperate Coastal seawater            | San Pedro Ocean Time Series, California             | 5    | 33 33N     | 118 24W    | 25 |
| Sub-tropical seawater                 | Sargasso Sea, Bermuda Atlantic Time Series          |      | 32.174835  | -64.01017  | 1  |
| Sub-tropical seawater                 | Sargasso Sea, Bermuda Atlantic Time Series          |      | 31.175     | -64.32433  | 5  |
| Temperate Coastal seawater            | South of Charleston, SC                             |      | 32.506943  | -79.263885 | 1  |
| <b>P2.2</b>                           |                                                     |      |            |            |    |
| Antarctic seawater                    | Antarctic ocean off the Antarctic Peninsula         | 21   | 68 24.5S   | 61 40.717W | 5  |
| <b>P2.3</b>                           |                                                     |      |            |            |    |
| Temperate Coastal seawater            | Gulf of Biscay pff Cudellero (Spain)                | 15   | 43 42N     | 6 09W      | 1  |
| Sub-tropical seawater                 | Hawaiian Ocean Time Series                          | 770  | 25 45N     | 158W       | 1  |
| Sub-tropical seawater                 | Hawaiian Ocean Time Series                          | 4000 | 25 45N     | 158W       | 1  |
| Mediterranean                         | Ionian Sea                                          | 3000 | 36.50N     | 15.83E     | 53 |

|                            |                                            |      |            |           |    |
|----------------------------|--------------------------------------------|------|------------|-----------|----|
| Seawater                   |                                            |      |            |           |    |
| Mediterranean Seawater     | Ionian Sea                                 | 50   | 36.50N     | 15.83E    | 2  |
| Mediterranean Seawater     | Mediterranean off Malaga (Spain)           | 50   | 36 14.610N | 4 15.260W | 1  |
| Mediterranean Seawater     | Mediterranean off Malaga (Spain)           | 150  | 36 14.610N | 4 15.260W | 2  |
| Mediterranean Seawater     | Mediterranean off Malaga (Spain)           | 450  | 36 14.610N | 4 15.260W | 3  |
| Temperate Coastal seawater | Monterey Bay, California                   | 750  |            |           | 2  |
| Arctic sea water           | North Atlantic, Greenland Sea              | 2000 | 72.9N      | 4.7E      | 12 |
| Arctic sea water           | North Atlantic, Greenland Sea              | 50   | 72.9N      | 4.7E      | 6  |
| Sub-arctic seawater        | North subarctic Pacific seawater           | 500  | 48.97 N    | 130.67 W  | 56 |
| Sub-arctic seawater        | North subarctic Pacific seawater           | 500  | 50.00 N    | 145.00 W  | 48 |
| Sub-arctic seawater        | North subarctic Pacific seawater           | 500  | 48.65 N    | 126.67 W  | 11 |
| Temperate Coastal seawater | San Pedro Ocean Time Series, California    | 70   | 33 33N     | 118 24W   | 9  |
| Temperate Coastal seawater | San Pedro Ocean Time Series, California    | 150  | 33 33N     | 118 24W   | 8  |
| Temperate Coastal seawater | San Pedro Ocean Time Series, California    | 500  | 33 33N     | 118 24W   | 6  |
| Temperate Coastal seawater | San Pedro Ocean Time Series, California    | 890  | 33 33N     | 118 24W   | 1  |
| Sub-tropical seawater      | Sargasso Sea, Bermuda Atlantic Time Series |      | 32.174835  | -64.01017 | 3  |
| Mediterranean              | Transect from Barcelona                    | 400  | 40 40.270N | 2 51.980E | 4  |

|                                          |                                                           |      |            |            |    |
|------------------------------------------|-----------------------------------------------------------|------|------------|------------|----|
| seawater                                 | to Majorca (Spain)<br>Abyssal plain                       |      |            |            |    |
| Tropical seawater -<br>coastal upwelling | Upwelling, Fernandina<br>Island                           | 12   | -0.3011111 | 91.651665  | 7  |
|                                          |                                                           |      |            |            |    |
| <b>P3.1</b>                              |                                                           |      |            |            |    |
| Tropical seawater                        | 201 miles from F.<br>Polynesia, Tropical South<br>Pacific | 50   | -10.131389 | -135.44945 | 1  |
| Tropical coastal<br>seawater             | Devil's Crown, Floreana<br>Island                         |      | -1.2161111 | -90.422775 | 2  |
| Sub-tropical<br>coastal seawater         | Kaneohe Bay, Hawaii                                       |      | 0.27222222 | -91.63333  | 1  |
| Tropical coastal<br>seawater             | Northeast of Colon,<br>Caribbean Sea                      |      | 10.716389  | -80.25445  | 1  |
| Sub-tropical<br>seawater                 | Sargasso Sea Station 11                                   |      | 31.175     | -64.32433  | 1  |
| Tropical coastal<br>seawater             | Warm seep, Roca<br>Redonda                                |      | 27222222   | -91.63333  | 1  |
| Tropical coastal<br>seawater             | Wolf Island                                               | 1.7  | 1.3891667  | -91.81695  | 2  |
|                                          |                                                           |      |            |            |    |
| <b>P3.2</b>                              |                                                           |      |            |            |    |
| ACE lake                                 | Antarctic continent                                       | 5    | 68 28.33S  | 78 11.29E  | 1  |
| Temperate coastal<br>seawater            | Cape May, NJ                                              | 1    | 38.94      | -74.685    | 1  |
| Temperate<br>Estuarine                   | Chesapeake Bay, MD                                        | 13.2 | 38.946945  | -76.41722  | 11 |
| Temperate<br>Estuarine                   | Delaware Bay, NJ                                          | 1    | 39.417778  | 75.504166  | 3  |
| Temperate coastal<br>seawater            | Gulf of Maine                                             | 1    | 42.503056  | -67.24     | 1  |
| Temperate coastal<br>seawater            | Off Nags Head, NC                                         | 2.1  | 36.003887  | -75.39472  | 5  |

|                                       |                                  |      |            |            |   |
|---------------------------------------|----------------------------------|------|------------|------------|---|
| Sub-arctic coastal seawater           | Outside Halifax, Nova Scotia     | 2    | 44.137222  | -63.644444 | 1 |
| Sub-arctic coastal seawater           | Outside Halifax, Nova Scotia     | 2    | 44.137222  | -63.644444 | 2 |
| Antarctic seawater                    | Southern Ocean                   | 2    | -55.25     | 74.25613   | 1 |
| Antarctic coastal seawater            | Southern Ocean                   | 2    | -64.831    | 80.724     | 1 |
| Antarctic seawater                    | Southern Ocean                   | 2    | -60.00007  | 141.23353  | 1 |
| Arctic coastal seawater               | Svalbard, Norway                 | 5    | 79 00.07N  | 11 18.33E  | 1 |
|                                       |                                  |      |            |            |   |
| <b>NA2</b>                            |                                  |      |            |            |   |
| Arctic sea water                      | North Atlantic, Greenland Sea    | 2000 | 72.9N      | 4.7E       | 9 |
| Sub-arctic seawater                   | North subarctic Pacific seawater | 500  | 48.97 N    | 130.67 W   | 1 |
| Tropical seawater - coastal upwelling | Upwelling, Fernandina Island     | 12   | -0.3011111 | 91.651665  | 1 |
| Tropical seawater - coastal upwelling | Upwelling, Fernandina Island     | 12   | -0.3011111 | 91.651665  | 2 |
|                                       |                                  |      |            |            |   |
| <b>NA2</b>                            |                                  |      |            |            |   |
| Mediterranean Seawater                | Ionian Sea                       | 3000 | 36.50N     | 15.83E     | 2 |
| Mediterranean seawater                | Mediterranean off Malaga (Spain) | 450  | 36 14.610N | 4 15.260W  | 1 |
| Arctic sea water                      | North Atlantic, Greenland Sea    | 2000 | 72.9N      | 4.7E       | 2 |
| Sub-arctic seawater                   | North subarctic Pacific seawater | 500  | 48.97 N    | 130.67 W   | 1 |
| Sub-arctic seawater                   | North subarctic Pacific seawater | 500  | 50.00 N    | 145.00 W   | 2 |

**Table S2.** Metagenome sample sets used in this study. \* sample sets generated during this study.

| Sample name | MG-RAST ID | Sample date | Environment | Location                | Latitude  | Longitude  | Sequence platform |
|-------------|------------|-------------|-------------|-------------------------|-----------|------------|-------------------|
| GS399*      | N/A        | 18/11/09    | Sea-Ice     | Ross Sea, McMurdo Sound | 77 42.43S | 166 0.7E   | 454               |
| GS400*      | N/A        | 21/11/09    | Sea-Ice     | Ross Sea, McMurdo Sound | 77 42.43S | 166 0.7E   | 454               |
| GS401*      | N/A        | 22/11/09    | Sea-Ice     | Ross Sea, McMurdo Sound | 77 42.43S | 166 0.7E   | 454               |
| GS402*      | N/A        | 23/11/09    | Ice edge    | Ross Sea, McMurdo Sound | 77 42.43S | 166 0.7E   | 454               |
| GS369*      | N/A        | 24/01/09    | Open Ocean  | Ross Sea, McMurdo Sound | 77 40.23S | 165 60.46E | 454               |
| GS370*      | N/A        | 28/01/09    | Sea-Ice     | Ross Sea, McMurdo Sound | 77 42.43S | 166 4.52E  | 454               |
| GS371*      | N/A        | 28/01/09    | Under Ice   | Ross Sea, McMurdo Sound | 77 42.43S | 166 0.7E   | 454               |
| GS372*      | N/A        | 30/01/09    | Under Ice   | Ross Sea, McMurdo Sound | 77 40.27S | 166 0.7E   | 454               |
| GS353*      | N/A        | 30/12/07    | Open Ocean  | Southern Ocean          | 67 02.56S | 144 40.06E | 454               |
| GS389*      | N/A        | 22/10/08    | Open Ocean  | Southern Ocean          | 64 48.10S | 112 22.40E | 454               |
| GS390*      | N/A        | 30/10/08    | Open Ocean  | Southern Ocean          | 64 48.93S | 080 43.22E | 454               |
| GS388*      | N/A        | 20/10/08    | Open Ocean  | Southern Ocean          | 63 48.54S | 115 09.70E | 454               |
| GS392*      | N/A        | 13/12/08    | Open Ocean  | Southern Ocean          | 64 10.95S | 076 27.22E | 454               |
| GS387*      | N/A        | 19/10/08    | Open Ocean  | Southern Ocean          | 60 29.58S | 120 02.44E | 454               |
| GS391*      | N/A        | 12/12/08    | Open Ocean  | Southern Ocean          | 68 23.39S | 076 39.91E | 454               |
| GS349*      | N/A        | 27/12/07    | Open Ocean  | Southern Ocean          | 66 33.49S | 142 19.00E | 454               |

|        |           |          |             |                |           |            |            |
|--------|-----------|----------|-------------|----------------|-----------|------------|------------|
| GS355* | N/A       | 3/01/08  | Open Ocean  | Southern Ocean | 66 44.85S | 144 19.53E | 454        |
| GS352* | N/A       | 29/12/07 | Open Ocean  | Southern Ocean | 66 45.45S | 143 17.22E | 454        |
| GS347* | N/A       | 23/12/07 | Open Ocean  | Southern Ocean | 66 0.64S  | 142 39.48E | 454        |
| GS360* | N/A       | 13/01/08 | Open Ocean  | Southern Ocean | 66 33.95S | 140 51.93E | 454        |
| GS351* | N/A       | 28/12/07 | Open Ocean  | Southern Ocean | 66 33.26S | 143 19.62E | 454        |
| GS348* | N/A       | 24/12/07 | Open Ocean  | Southern Ocean | 66 20.18S | 142 59.14E | 454        |
| GS235* | N/A       | 1/01/07  | Coastal     | Southern Ocean | 66 16.1S  | 110 32E    | 454        |
| GS357* | N/A       | 5/01/08  | Open Ocean  | Southern Ocean | 66 10.16S | 142 55.56E | 454        |
| GS236* | N/A       | 7/01/07  | Coastal     | Southern Ocean | 63 52.72S | 112 4.2E   | 454        |
| GS358* | N/A       | 9/01/08  | Open Ocean  | Southern Ocean | 64 18.00S | 150 00.17E | 454        |
| GS359* | N/A       | 12/01/08 | Open Ocean  | Southern Ocean | 66 10.71S | 143 29.25E | 454        |
| GS362* | N/A       | 19/01/08 | Open Ocean  | Southern Ocean | 65 32.10S | 140 42.70E | 454        |
| GS231  | 4443684.3 | 21/12/06 | Saline lake | Ace Lake       | 68.473°S  | 78.189°E   | Sanger/454 |
| GS232  | 4443682.3 | 21/12/06 | Saline lake | Ace Lake       | 68.473°S  | 78.189°E   | Sanger/454 |
| GS012  | 4441584.3 | 18/12/03 | Estuary     | Chesapeake Bay | 38.9469°N | 76.4172W   | Sanger     |
| GS393* | N/A       | 15/12/08 | Open Ocean  | Southern Ocean | 55 15.44S | 074 15.18E | 454        |
| GS386* | N/A       | 17/10/08 | Open Ocean  | Southern Ocean | 54 56.45S | 129 37.11E | 454        |
| GS394* | N/A       | 17/12/08 | Open Ocean  | Southern Ocean | 53 00.74S | 073 22.25E | 454        |

|           |           |          |            |                                   |           |            |        |
|-----------|-----------|----------|------------|-----------------------------------|-----------|------------|--------|
| GS346*    | N/A       | 20/12/07 | Open Ocean | Southern Ocean                    | 59 17.86S | 142 26.88E | 454    |
| GS363*    | N/A       | 22/01/08 | Open Ocean | Southern Ocean                    | 59 59.50S | 141 13.51E | 454    |
| GS364*    | N/A       | 23/01/08 | Open Ocean | Southern Ocean                    | 56 41.36S | 141 52.06E | 454    |
| GS366*    | N/A       | 24/01/08 | Open Ocean | Southern Ocean                    | 52 01.20S | 144 03.47E | 454    |
| PLY3704   | 4443704.3 | 19/05/06 | Coastal    | Norwegian Fjord                   | 60 16.10N | 5 13.20E   | 454    |
| GS013     | 4441585.3 | 19/12/03 | Coastal    | Nags Head, NC                     | 36 0'14N  | 75 23'41W  | Sanger |
| GS008     | 4441583.3 | 16/11/03 | Coastal    | Newport Harbour, RI               | 41 29'9N  | 71 21'4W   | Sanger |
| Apr_night | 4445067.3 | 22/04/08 | Coastal    | English Channel                   | 50.2518N  | 4.2089W    | 454    |
| PLY3705   | 4443705.3 | 19/05/06 | Coastal    | Norwegian Fjord                   | 60 16.10N | 5 13.20E   | 454    |
| PLY3702   | 4443702.3 | 13/05/06 | Coastal    | Norwegian Fjord                   | 60 16.10N | 5 13.20E   | 454    |
| PLY3703   | 4443703.3 | 13/05/06 | Coastal    | Norwegian Fjord                   | 60 16.10N | 5 13.20E   | 454    |
| Apr_day   | 4444077.3 | 22/04/08 | Coastal    | English Channel                   | 50.2518N  | 4.2089W    | 454    |
| Jan_night | 4445070.3 | 28/01/08 | Coastal    | English Channel                   | 50.2518N  | 4.2089W    | 454    |
| GS367     | N/A       | 25/01/08 | Open Ocean | Tasman Sea                        | 48 13.96S | 145 47.65E | Sanger |
| GS009     | 4441143.3 | 17/11/03 | Coastal    | Block Island, NY                  | 41 5'28N  | 71 36'8W   | Sanger |
| GS011     | 4441658.3 | 18/11/03 | Estuary    | Delaware Bay, NJ                  | 39 25'4N  | 75 30'15W  | Sanger |
| MontBay5  | 4443716.3 | 15/05/01 | Coastal    | Monterey Bay, CA, USA             | 37 0N     | 122 0W     |        |
| GS006     | 4441582.3 | 23/08/03 | Estuary    | Bay of Fundy, Nova Scotia,<br>CAN | 45 6'42N  | 64 56'48W  | Sanger |

|          |           |          |            |                                 |           |            |        |
|----------|-----------|----------|------------|---------------------------------|-----------|------------|--------|
| GS003    | 4441580.3 | 21/08/03 | Coastal    | Browns Bank, Maine, CAN         | 42 51'10N | 66 13'2W   | Sanger |
| GS010    | 4441144.3 | 18/11/03 | Coastal    | Cape May, NJ, USA               | 38 56'24N | 74 41'6W   | Sanger |
| MontBay1 | 4443713.3 | 15/10/00 | Coastal    | Monterey Bay, CA, USA           | 36.75 N   | 122 0W     | 454    |
| MontBay2 | 4443712.3 | 15/10/00 | Coastal    | Monterey Bay, CA, USA           | 36.75 N   | 122 0W     | 454    |
| MontBay3 | 4443714.3 | 25/04/01 | Coastal    | Monterey Bay, CA, USA           | 36.75 N   | 122 0W     | 454    |
| MontBay4 | 4443715.3 | 25/04/01 | Coastal    | Monterey Bay, CA, USA           | 36.75 N   | 122 0W     | 454    |
| MontBay6 | 4443717.3 | 15/05/01 | Coastal    | Monterey Bay, CA, USA           | 36.75 N   | 122 0W     | 454    |
| GS368    | N/A       | 26/01/08 | Open Ocean | Southern Ocean                  | 44 42.54S | 145 45.15E | Sanger |
| GS005    | 4441581.3 | 22/08/03 | Embayment  | Bedford Basin, Nova Scotia, CAN | 44 41'25N | 63 38'14W  | Sanger |
| Aug4am   | 4445066.3 | 26/08/08 | Coastal    | English Channel                 | 50.2518N  | 4.2089W    | 454    |
| Aug10pm  | 4445065.3 | 26/08/08 | Coastal    | English Channel                 | 50.2518N  | 4.2089W    | 454    |
| Aug4pm   | 4445068.3 | 26/08/08 | Coastal    | English Channel                 | 50.2518N  | 4.2089W    | 454    |
| BBAY01   | 4443688.3 | 18/10/06 | Coastal    | Botany Bay, Australia           | 33 59'27S | 151 13'55E | Sanger |
| GS004    | 4441152.3 | 22/08/03 | Coastal    | Halifax, Nova Scotia, CAN       | 44 8'14N  | 63 38'40W  | Sanger |
| GS007    | 4441153.3 | 25/08/03 | Coastal    | Northern Gulf of Maine, Canada  | 43 37'56N | 66 50'50W  | Sanger |
| GS002    | 4441579.3 | 21/08/03 | Coastal    | Gulf of Maine, Canada           | 42 30'11N | 67 14'24W  | Sanger |
| BBAY02   | 4443689.3 | 18/10/06 | Coastal    | Botany Bay, Australia           | 33 59'27S | 151 13'55E | Sanger |
| GS014    | 4441659.3 | 20/12/03 | Coastal    | South of Charleston, SC         | 32 30'25N | 79 15'50W  | Sanger |



|          |           |          |                   |                                         |                |             |        |
|----------|-----------|----------|-------------------|-----------------------------------------|----------------|-------------|--------|
| GS031    | 4441597.3 | 10/02/04 | Coastal Upwelling | Fernandina Island,<br>Galapagos Islands | 0 18'4S        | 91 39'6W    | Sanger |
| GS000c   | 4441574.3 | 25/02/03 | Open Ocean        | Sargasso Sea, Station 3                 | 32<br>10'29.4N | 64 00'36.6W | Sanger |
| GS000d   | 4441575.3 | 26/02/03 | Open Ocean        | Sargasso Sea, Station 13                | 31 10'30N      | 64 19'27.6W | Sanger |
|          |           |          |                   |                                         |                |             |        |
| NASB1741 | 4443725.3 | N/A      | Open Ocean        | Sargasso Sea                            | 32<br>10'29.4N | 64 00'36.6W | 454    |
| NASB1742 | 4443729.3 | N/A      | Open Ocean        | Sargasso Sea                            | 32<br>10'29.4N | 64 00'36.6W | 454    |
| NASB1791 | 4443731.3 | N/A      | Open Ocean        | Sargasso Sea                            | 32<br>10'29.4N | 64 00'36.6W | 454    |
| NASB1792 | 4443732.3 | N/A      | Open Ocean        | Sargasso Sea                            | 32<br>10'29.4N | 64 00'36.6W | 454    |
| GS122a   | 4441615.3 | 30/09/05 | Open Ocean        | Indian Ocean                            | 30 53'54S      | 40 25'13E   | Sanger |
| GS123    | 4441616.3 | 1/10/05  | Open Ocean        | Indian Ocean                            | 32 23'57S      | 36 35'31E   | Sanger |
| GS000b   | 4441572.3 | 26/02/03 | Open Ocean        | Sargasso Sea, Station 11                | 31 10'30N      | 64 19'27.6W | Sanger |
| GS035    | 4441601.3 | 1/03/04  | Coastal           | Wolf Island, Galapagos<br>Islands       | 1 23'21N       | 91 49'1W    | Sanger |
| GS120    | 4441135.3 | 27/09/05 | Open Ocean        | Madagascar, Indian Ocean                | 26 2'6S        | 50 7'23E    | Sanger |
| GS001a   | 4441576.3 | 15/05/03 | Open Ocean        | Sargasso Sea, Hydrostation S            | 32 10'00N      | 64 30'00W   | Sanger |
| GS001c   | 4441578.3 | 25/02/03 | Open Ocean        | Sargasso Sea, Hydrostation S            | 32 10'00N      | 64 30'00W   | Sanger |

|        |           |          |               |                                    |            |            |        |
|--------|-----------|----------|---------------|------------------------------------|------------|------------|--------|
| GS121  | 4441614.3 | 29/09/06 | Open Ocean    | Indian Ocean                       | 29 20'56S  | 43 12'56E  | Sanger |
| GS119  | 4441568.3 | 26/09/05 | Open Ocean    | Indian Ocean                       | 23 12'58S  | 52 18'22E  | Sanger |
| GS015  | 4441586.3 | 8/01/04  | Coastal       | Caribbean Sea                      | 24 29'18N  | 83 4'12W   | Sanger |
| GS027  | 4441595.3 | 4/02/04  | Coastal       | Floreana Island, Galapagos Islands | 1 12'58S   | 90 25'22W  | Sanger |
| GS036  | 4441602.3 | 2/03/04  | Coastal       | Isabella Island, Galapagos Islands | 0 1'15S    | 91 11'52W  | Sanger |
| GS108a | 4441139.3 | 3/08/05  | Lagoon Reef   | Cocos Keeling, Indian Ocean        | 12 5'33S   | 96 52'54E  | Sanger |
| GS028  | 4441596.4 | 4/02/04  | Coastal       | Floreana Island                    | 1 13'1S    | 90 19'11W  | Sanger |
| GS029  | 4441596.3 | 8/02/04  | Coastal       | Santiago Island                    | 0 12'0S    | 90 50'7W   | Sanger |
| GS116  | 4441149.3 | 17/08/05 | Open Ocean    | Indian Ocean                       | 4 38'6S    | 56 50'10E  | Sanger |
| GS016  | 4441660.3 | 8/01/04  | Coastal       | Caribbean Sea                      | 24 10'29N  | 84 20'40W  | Sanger |
| GS111  | 4441156.3 | 7/08/05  | Open Ocean    | Indian Ocean                       | 9 35'49S"  | 84 11'51E" | Sanger |
| GS117a | 4441613.3 | 9/09/05  | Coastal       | St. Anne Island, Seychelles        | 4 36'49S"  | 55 30'31E" | Sanger |
| GS112a | 4441609.3 | 8/08/05  | Open Ocean    | Indian Ocean                       | 8 30'18S"  | 80 22'32E" | Sanger |
| GS030  | 4442626.3 | 9/02/04  | Warm Seep     | Galapagos Island                   | 0 16'20N"  | 91 38'0W"  | Sanger |
| GS030a | 4441662.3 | 9/02/04  | Warm Seep     | Galapagos Island                   | 0 16'20N"  | 91 38'0W"  | Sanger |
| GS148  | 4441617.3 | 11/09/05 | Fringing Reef | Indian Ocean                       | 6 19'S     | 39 33E"    | Sanger |
| GS149  | 4441618.3 | 12/09/05 | Harbour       | Zanzibar                           | 6 7'S      | 39 07'E    | Sanger |
| GS017  | 4441587.3 | 9/09/05  | Open Ocean    | Caribbean Sea                      | 20 31'21N" | 85 24'49W" | Sanger |

|          |           |          |             |                        |                |             |        |
|----------|-----------|----------|-------------|------------------------|----------------|-------------|--------|
| GS110    | 4441607.3 | 6/08/05  | Open Ocean  | Indian Ocean           | 10 26'46S"     | 88 18'10E"  | Sanger |
| GS109    | 4441155.3 | 5/08/05  | Open Ocean  | Indian Ocean           | 10 56'37S"     | 92 3'32E"   | Sanger |
| GS051    | 4441604.3 | 22/05/04 | Coral Atoll | Polynesian Archipelago | 15 8'37S"      | 147 26'6W"  | Sanger |
| GS018    | 4441588.3 | 10/01/04 | Open Ocean  | Caribbean Sea          | 18 2'12N"      | 83 47'5W"   | Sanger |
| S_35155  | 4443697.3 | 25/04/07 | Open Ocean  | Pacific Ocean          | 1 40'N         | 163 40'W    | 454    |
| S_35171  | 4443700.3 | 27/04/07 | Open Ocean  | Pacific Ocean          | 16 00'S        | 170 00'W    | 454    |
| GS034    | 4441600.3 | 19/02/04 | Coastal     | Galapagos Islands      | 0 22'59S"      | 90 16'47W"  | Sanger |
| GS113    | 4441610.3 | 9/08/05  | Open Ocean  | Indian Ocean           | 7 0'27S"       | 76 19'53E"  | Sanger |
| Bios-10m | 4449104.3 | Jun-2010 | Open Ocean  | Sargasso Sea           | 32<br>10'29.4N | 64 00'36.6W | 454    |
| GS021    | 4441591.3 | 19/01/04 | Coastal     | Gulf of Panama         | 8 7'45N"       | 79 41'28W"  | Sanger |
| S_35162  | 4443698.3 | 26/04/07 | Open Ocean  | Pacific Ocean          | 5 8'N          | 161 97'W    | 454    |
| S_35163  | 4443699.3 | 26/04/07 | Open Ocean  | Pacific Ocean          | 5 5'N          | 161 58'W    | 454    |
| GS019    | 4441589.3 | 12/01/04 | Coastal     | Caribbean Sea          | 10 42'59N"     | 80 15'16W"  | Sanger |
| GS026    | 4441594.3 | 1/02/04  | Open Ocean  | Galapagos Islands      | 1 15'51N"      | 90 17'42W"  | Sanger |
| GS115    | 4441150.3 | 16/08/05 | Open Ocean  | Indian Ocean           | 4 39'45S"      | 60 31'23E"  | Sanger |
| GS037    | 4441145.3 | 17/03/04 | Open Ocean  | Pacific Ocean          | 1 58'26S"      | 95 0'53W"   | Sanger |
| S_35179  | 4443701.3 | 29/04/07 | Open Ocean  | Pacific Ocean          | 13 29'N        | 159 53'W    | 454    |
| GS114    | 4441611.3 | 15/08/05 | Open Ocean  | Indian Ocean           | 4 59'25S"      | 64 58'36E"  | Sanger |

|         |           |          |            |                        |            |             |        |
|---------|-----------|----------|------------|------------------------|------------|-------------|--------|
| GS047   | 4441146.3 | 28/03/04 | Open Ocean | Pacific Ocean          | 10 7'53S"  | 135 26'58W" | Sanger |
| GS023   | 4441661.3 | 21/01/04 | Open Ocean | Pacific Ocean          | 5 38'24N"  | 86 33'55W"  | Sanger |
| GS049   | 4441605.3 | 18/05/05 | Coastal    | Polynesian Archipelago | 17 27'11S" | 149 47'56W" | Sanger |
| GS048a  | 4441603.3 | 17/05/04 | Coral Reef | Polynesian Archipelago | 17 28'33S" | 149 48'44W" | Sanger |
| S_35131 | 4443766.3 | 21/04/07 | Open Ocean | Pacific Ocean          | 16 00'S    | 170 00'W    | 454    |
| GS022   | 4441592.3 | 20/01/04 | Open Ocean | Pacific Ocean          | 6 29'34N"  | 82 54'14W"  | Sanger |
| S_35139 | 4443701.3 | 23/04/07 | Open Ocean | Pacific Ocean          | 7 31'S     | 167 00'W    | 454    |

**Table S3.** Environmental data associated with metagenomes used in this study.

| <b>Sample</b> | <b>Temp (°C)</b> | <b>Depth of water column (m)</b> | <b>Salinity</b>   | <b>Chlorophyll <math>l\alpha</math></b> |
|---------------|------------------|----------------------------------|-------------------|-----------------------------------------|
| GS399*        | -2               | 700                              | 3.3 <sup>a</sup>  | 4.52 <sup>a</sup>                       |
| GS400*        | -2               | 700                              | 3.3 <sup>a</sup>  | 4.52 <sup>a</sup>                       |
| GS401*        | -2               | 700                              | 3.3 <sup>a</sup>  | 4.52 <sup>a</sup>                       |
| GS402*        | -2               | 700                              | 3.3 <sup>a</sup>  | 4.52 <sup>a</sup>                       |
| GS369*        | -2               | 300                              | 3.35              | 4.46                                    |
| GS370*        | -2               | 300                              | 3.6               | 3.17                                    |
| GS371*        | -2               | 300                              | 3.3               | 4.72                                    |
| GS372*        | -2               | 300                              | 3.2               | 5.23                                    |
| GS353*        | -1.8             | 178                              | 3.45              | 0                                       |
| GS389*        | -1.76            | 500                              | 3.47 <sup>a</sup> | 0.14                                    |
| GS390*        | -1.74            | 116                              | 3.43              | 0.32                                    |
| GS388*        | -1.73            | 2500                             | 3.4 <sup>a</sup>  | 1.5                                     |
| GS392*        | -1.53            | 3847                             | 3.36              | 0.04                                    |
| GS387*        | -1.5             | 3200                             | 3.45 <sup>a</sup> | 0.22                                    |
| GS391*        | -1.4             | 378                              | 3.42              | 5                                       |
| GS349*        | -1.3             | 365                              | 3.4               | 3.7                                     |
| GS355*        | -0.89            | 891                              | 3.4               | 8.4                                     |
| GS352*        | -0.84            | 169                              | 3.4               | 1                                       |
| GS347*        | -0.7             | 443                              | 3.4               | 3.2                                     |
| GS360*        | -0.7             | 308                              | 3.41              | 7.5                                     |
| GS351*        | -0.7             | 597                              | 3.4               | 1.6                                     |
| GS348*        | -0.6             | 649                              | 3.42              | 12.6                                    |
| GS235*        | -0.5             | 60                               | 3.39              | 8.6                                     |
| GS357*        | -0.5             | 533                              | 3.42              | 2.7                                     |
| GS236*        | -0.2             | 2500                             | 3.37              | 12.1                                    |
| GS358*        | -0.03            | 3561                             | 3.35              | 0.3                                     |
| GS359*        | 0.05             | 364                              | 3.41              | 2.4                                     |
| GS362*        | 0.8              | 1027                             | 3.62              | 0.2                                     |
| GS231         | 1                | 25                               | 2.2               | 0.8                                     |
| GS232         | 1                | 25                               | 2.2               | 1.0                                     |
| GS012         | 1                | 25                               | 0.347             | 21.0                                    |
| GS393*        | 2.0              | 2246                             | 3.39              | 0.5                                     |
| GS386*        | 2.0              | 3200                             | 3.38              | 0.22                                    |
| GS394*        | 2.4              | 100                              | 3.39              | 0.6                                     |
| GS346*        | 2.9              | 3294                             | 3.37              | 0.3                                     |
| GS363*        | 3.5              | 4473                             | 3.37              | 0.1                                     |
| GS364*        | 4.2              | 3693                             | 3.37              | 0.5                                     |
| GS366*        | 7.7              | 3180                             | 3.38              | 0.3                                     |
| PLY3704       | 9.0              | N/A                              | 3.47 <sup>a</sup> | 2.8 <sup>a</sup>                        |
| GS013         | 9.3              | 20                               | 3.06 <sup>a</sup> | 3.0                                     |

|              |      |      |                   |                   |
|--------------|------|------|-------------------|-------------------|
| GS008        | 9.4  | 12   | 2.65              | 2.2               |
| Aprnight     | 9.6  | 50   | 3.5               | 1.32              |
| PLY3705      | 9.7  | N/A  | 3.5 <sup>a</sup>  | 2.73 <sup>a</sup> |
| PLY3702      | 9.7  | N/A  | 3.5 <sup>a</sup>  | 2.73 <sup>a</sup> |
| PLY3703      | 9.7  | N/A  | 3.5 <sup>a</sup>  | 2.73 <sup>a</sup> |
| Aprday       | 9.7  | 50   | 3.5               | 0.85              |
| Jannight     | 10.0 | 50   | 3.42              | 0.85              |
| Jannight     | 10.1 | 50   | 3.42              | 0.85              |
| GS367        | 10.9 | 3490 | 3.44              | 0.2               |
| GS009        | 11   | 32   | 3.1               | 4.0               |
| GS011        | 11   | 8    | 3.01 <sup>a</sup> | 4.8               |
| MontBay5     | 11   | 1000 | 3.3               | 1.83 <sup>a</sup> |
| GS006        | 11.2 | 11   | 3.26 <sup>a</sup> | 2.8               |
| GS003        | 11.7 | 119  | 2.99              | 1.4               |
| GS010        | 12   | 10   | 3.1               | 2.0               |
| MontBay1     | 14   | 1000 | 3.3               | 2.1 <sup>a</sup>  |
| MontBay2     | 14   | 1000 | 3.3               | 2.1 <sup>a</sup>  |
| MontBay3     | 14   | 1000 | 3.3               | 2.1 <sup>a</sup>  |
| MontBay4     | 14   | 1000 | 3.3               | 2.1 <sup>a</sup>  |
| MontBay6     | 14   | 1000 | 3.3               | 2.1 <sup>a</sup>  |
| GS368        | 14.2 | 3201 | 3.47              | 1.3               |
| GS005        | 15   | 64   | 3.02              | 6.0               |
| Aug4am       | 15.7 | 50   | 3.3               | 9.8               |
| Aug10pm      | 15.8 | 50   | 3.3               | 8.17              |
| Aug4pm       | 15.9 | 50   | 3.21              | 9.24              |
| BBAY01       | 17.1 | 2    | 3.36              | 0.8               |
| GS004        | 17.3 | 142  | 2.83              | 0.4               |
| GS007        | 17.9 | 139  | 3.17              | 1.4               |
| GS002        | 18.2 | 106  | 2.92              | 1.4               |
| BBAY02       | 18.3 | 2    | 3.62              | 0.82              |
| GS014        | 18.6 | 31   | 3.34 <sup>a</sup> | 1.7               |
| GS031        | 18.6 | 19.6 | 2.95 <sup>a</sup> | 0.35              |
| GS000c       | 19.8 | 4200 | 3.67              | 0.17              |
| GS000d       | 20   | 4200 | 3.66              | 0.17              |
| NASB174<br>1 | 20   | N/A  | 3.6               | 0.1 <sup>a</sup>  |
| NASB174<br>2 | 20   | N/A  | 3.6               | 0.1a              |
| NASB179<br>1 | 20   | N/A  | 3.6               | 0.1 <sup>a</sup>  |
| NASB179<br>2 | 20   | N/A  | 3.6               | 0.1 <sup>a</sup>  |
| GS122a       | 20.2 | 4921 | 3.58              | 0.151             |
| GS123        | 20.4 | 1860 | 3.58              | 0.228             |
| GS000b       | 20.5 | 4200 | 3.66              | 0.17              |

|          |       |      |                   |                   |
|----------|-------|------|-------------------|-------------------|
| GS035    | 21.8  | 71   | 3.45              | 0.28              |
| GS120    | 22.5  | 5081 | 3.56              | 0.117             |
| GS001a   | 22.9  | 4200 | 3.67              | 0.1               |
| GS001c   | 22.9  | 4200 | 3.67              | 0.1               |
| GS121    | 23.1  | 4309 | 3.54              | 0.14              |
| GS119    | 23.8  | 2995 | 3.54              | 0.08              |
| GS015    | 25    | 47   | 3.6               | 0.2               |
| GS027    | 25.5  | 2.3  | 3.49              | 0.4               |
| GS036    | 25.8  | 67   | 3.46              | 0.65              |
| GS108a   | 25.8  | 7    | 3.24              | 0.11              |
| GS028    | 26    | 156  | 3.12 <sup>a</sup> | 0.35              |
| GS029    | 26.2  | 12   | 3.45              | 0.40              |
| GS116    | 26.2  | 2150 | 3.31              | 0.29              |
| GS016    | 26.4  | 3333 | 3.58              | 0.16              |
| GS111    | 26.4  | 3841 | 3.23              | 0.20              |
| GS117a   | 26.4  | 4513 | 3.58              | 0.13              |
| GS112a   | 26.6  | 4573 | 3.25              | 0.134             |
| GS030    | 26.9  | 19   | 3.1 <sup>a</sup>  | 1.04 <sup>a</sup> |
| GS030a   | 26.9  | 19   | 3.1 <sup>a</sup>  | 1.04 <sup>a</sup> |
| GS148    | 27    | 1    | 3.17 <sup>a</sup> | 1.19 <sup>a</sup> |
| GS149    | 27    | 5    | 3.17 <sup>a</sup> | 1.18 <sup>a</sup> |
| GS017    | 27    | 4513 | 3.58              | 0.13              |
| GS110    | 27    | 1220 | 3.27              | 0.128             |
| GS109    | 27.2  | 4573 | 3.26              | 0.138             |
| GS051    | 27.3  | 10   | 3.42              | 0.8 <sup>a</sup>  |
| GS018    | 27.4  | 4470 | 3.54              | 0.14              |
| S_35155  | 27.4  | 4200 | 3.53              | 0.01 <sup>a</sup> |
| S_35171  | 27.5  | 4200 | 3.47              | 0.01 <sup>a</sup> |
| GS034    | 27.5  | 35   | 3.16 <sup>a</sup> | 0.36              |
| GS113    | 27.5  | 4573 | 3.33              | 0.24              |
| GS021    | 27.6  | 76   | 3.07              | 0.5               |
| Bios-10m | 27.58 | 3300 | 3.66 <sup>a</sup> | 0.37              |
| S_35162  | 27.6  | 4200 | 3.48              | 0.01 <sup>a</sup> |
| S_35163  | 27.6  | 4200 | 3.48              | 0.01 <sup>a</sup> |
| GS019    | 27.7  | 3336 | 3.54              | 0.23              |
| GS026    | 27.8  | 2386 | 3.26              | 0.22              |
| GS115    | 27.9  | 3220 | 3.32              | 0.14              |
| GS037    | 28    | 3334 | 3.27 <sup>a</sup> | 0.21              |
| S_35179  | 28.2  | 4200 | 3.44              | 0.01 <sup>a</sup> |
| GS114    | 28.2  | 3649 | 3.31              | 0.14              |
| GS047    | 28.6  | 2400 | 3.73              | 0.01 <sup>a</sup> |
| GS023    | 28.7  | 1139 | 3.26              | 0.03              |
| GS049    | 28.8  | 900  | 3.26              | 0.09              |
| GS048a   | 28.9  | 34   | 3.51              | 0.09              |
| S_35131  | 29.1  | 4200 | 3.52              | 0.01 <sup>a</sup> |

|         |      |      |      |                   |
|---------|------|------|------|-------------------|
| GS022   | 29.3 | 2431 | 3.23 | 0.33              |
| S_35139 | 30.1 | 4200 | 3.53 | 0.01 <sup>a</sup> |

\* sample sets generated during this study.

<sup>a</sup> Estimated using expectation maximization algorithm in the Primer V6 + PERMANOVER software (Clarke and Gorley, 2006).



**Table S4.** Results of DISTLM fitting environmental data to relative abundances of SAR11 phylotypes in 128 surface marine metagenome samples. Marginal tests identify the explanatory power of each variable in isolation. The BEST solution identifies the variables best describing the observed phylotype distribution for any given number of combinations. Analyses were carried out with both the full sample set (top) and also on only the 79 samples for which data on all variables was available. SS = sum of squares; Pseudo-F (multivariate analogue of Fishers F ratio, as the pseudo-F statistic gets larger, the likelihood of the null hypothesis being true [ i.e. no relationship between phylotype distribution and environmental variables], diminishes); Prop. = proportion of variation explained by each variable or combination of variables; P = significance by permutation; No. Var = number of the variable; DWC = depth of the water column.

| <b>Full set: 128 metagenomes</b>   |            |          |            |       |          |             |
|------------------------------------|------------|----------|------------|-------|----------|-------------|
| <b>Marginal Test</b>               |            |          |            |       |          |             |
| Variable                           | SS (trace) | Pseudo-F | Prop.      | P     |          |             |
| DWC                                | 30963      | 13.425   | 0.097      | 0.001 |          |             |
| Salinity                           | 5706       | 2.2748   | 0.0178     | 0.089 |          |             |
| Chlorophyll                        | 43655      | 19.8     | 0.13674    | 0.001 |          |             |
| Latitude                           | 1.83E+05   | 167.86   | 0.57318    | 0.001 |          |             |
| Temperature                        | 1.84E+05   | 169      | 0.57483    | 0.001 |          |             |
| <b>BEST solution</b>               |            |          |            |       |          |             |
| R <sup>2</sup>                     | RSS        | No. Var  | Selections |       | Variable |             |
| 0.57483                            | 1.36E+05   | 1        | 4          |       | 1        | DWC         |
| 0.59675                            | 1.29E+05   | 2        | 4,5        |       | 2        | Salinity    |
| 0.61536                            | 1.23E+05   | 3        | 1,4,5      |       | 3        | Chlorophyll |
| 0.62373                            | 1.20E+05   | 4        | 1,2,4,5    |       | 4        | Temperature |
| 0.6262                             | 1.19E+05   | 5        | All        |       | 5        | Latitude    |
| <b>Fit Last in Sequential Test</b> |            |          |            |       |          |             |
| Variable                           | SS (trace) | Pseudo-F | Prob.      | P     |          |             |
| Temperature                        | 6693.7     | 6.8321   | 2.0967E-2  | 0.001 |          |             |
| Latitude                           | 7231.8     | 7.3813   | 2.2652E-2  | 0.001 |          |             |
| DWC                                | 6307.8     | 6.4382   | 1.9758E-2  | 0.001 |          |             |
| Salinity                           | 2054.7     | 2.0972   | 6.436E-3   | 0.107 |          |             |
| Chlorophyll                        | 786.53     | 0.80279  | 2.4637     | 0.501 |          |             |
| <b>Analysis of P1a clade only</b>  |            |          |            |       |          |             |
| Marginal Test                      | SS (trace) | Pseudo-F | Prop.      | P     |          |             |
| DWC                                | 36557      | 16.59    | 0.11885    | 0.001 |          |             |
| Salinity                           | 3187.7     | 1.288    | 1.0363E-2  | 0.295 |          |             |
| Chlorophyll                        | 50053      | 23.905   | 0.16272    | 0.001 |          |             |
| Latitude                           | 2.0681E5   | 252.37   | 0.67232    | 0.001 |          |             |
| Temperature                        | 2.0259E5   | 237.29   | 0.65861    | 0.001 |          |             |

| Subset: 79 metagenomes with all variables available |            |          |            |       |          |             |
|-----------------------------------------------------|------------|----------|------------|-------|----------|-------------|
| <b>Marginal Test</b>                                |            |          |            |       |          |             |
| Variable                                            | SS (trace) | Pseudo-F | Prop.      | P     |          |             |
| DWC                                                 | 17901      | 8.7738   | 0.120229   | 0.002 |          |             |
| Salinity                                            | 2607.5     | 1.1646   | 1.49E-02   | 0.315 |          |             |
| Chlorophyll                                         | 15846      | 7.6658   | 9.05E-02   | 0.002 |          |             |
| Temperature                                         | 1.09E+05   | 127.09   | 0.62271    | 0.001 |          |             |
| Latitude                                            | 1.08E+05   | 122.78   | 0.61458    | 0.001 |          |             |
| <b>BEST solution</b>                                |            |          |            |       |          |             |
| R <sup>2</sup>                                      | RSS        | No. Var  | Selections |       | Variable |             |
| 0.62271                                             | 66029      | 1        | 4          |       | 1        | DWC         |
| 0.64583                                             | 61983      | 2        | 4,5        |       | 2        | Salinity    |
| 0.6699                                              | 57769      | 3        | 1,4,5      |       | 3        | Chlorophyll |
| 0.68259                                             | 55549      | 4        | 1,2,4,5    |       | 4        | Temperature |
| 0.68732                                             | 54721      | 5        | All        |       | 5        | Latitude    |
| <b>Fit Last in Sequential Test</b>                  |            |          |            |       |          |             |
| Variable                                            | SS (trace) | Pseudo-F | Prop.      | P     |          |             |
| Temperature                                         | 5663.1     | 7.5547   | 3.2359E-2  | 0.001 |          |             |
| Latitude                                            | 4374.6     | 5.8359   | 2.4997E-2  | 0.004 |          |             |
| DWC                                                 | 4179.8     | 5.576    | 2.3883E-2  | 0.002 |          |             |
| Salinity                                            | 2116.2     | 2.8231   | 1.2092E-2  | 0.044 |          |             |
| Chlorophyll                                         | 827.8      | 1.1043   | 4.7301E-3  | 0.366 |          |             |
| <b>Analysis of P1a clade only</b>                   |            |          |            |       |          |             |
| Marginal Test                                       | SS (trace) | Pseudo-F | Prop.      | P     |          |             |
| DWC                                                 | 22521      | 10.787   | 0.12287    | 0.001 |          |             |
| Salinity                                            | 863.05     | 0.36429  | 4.7088E-03 | 0.755 |          |             |
| Chlorophyll                                         | 19653      | 9.2483   | 0.10723    | 0.001 |          |             |
| Latitude                                            | 1.2419E5   | 161.83   | 0.6776     | 0.001 |          |             |
| Temperature                                         | 1.1958E5   | 144.53   | 0.65242    | 0.001 |          |             |

**Table S5.** Specific genes, paralogous genes, and genes with signatures of positive selection in ACE\_P1a.1, ACE\_P3.2, and IMCC9063 genomes. For positive selection comparisons are between ACE\_P3.2 vs HIMB114, ACE\_P1a.1 vs HTCC7211, and IMCC9063 vs HIMB114. NA, not available. For positive selection, \* = maximum dN/dS ratio over a 60 codon window.

| <b>Genes specific to ACE_P1a.1</b> |                                                              |            |                     |
|------------------------------------|--------------------------------------------------------------|------------|---------------------|
| <b>Gene ID</b>                     | <b>Annotation</b>                                            | <b>COG</b> | <b>COG Category</b> |
| feature:167713860                  | hypothetical protein                                         | NA         | NA                  |
| feature:167713862                  | hypothetical protein                                         | NA         | NA                  |
| feature:167713864                  | hypothetical protein RHECIAT_CH0003834                       | NA         | NA                  |
| feature:167713866                  | hypothetical protein                                         | NA         | NA                  |
| feature:167713868                  | hypothetical protein                                         | NA         | NA                  |
| feature:167713870                  | hypothetical protein                                         | NA         | NA                  |
| feature:167713872                  | hypothetical protein                                         | NA         | NA                  |
| feature:167713874                  | hypothetical protein                                         | NA         | NA                  |
| feature:167713876                  | probable integrase protein                                   | COG0582    | [L]                 |
| feature:167713882                  | lipoprotein precursor                                        | NA         | NA                  |
| feature:167713894                  | cell division protein FtsI                                   | NA         | NA                  |
| feature:167713902                  | phospho-N-acetylmuramoyl-pentapeptide-transferase            | COG0472    | [M]                 |
| feature:167713906                  | hypothetical protein                                         | NA         | NA                  |
| feature:167713920                  | cell division protein FtsA                                   | COG0849    | [D]                 |
| feature:167713922                  | cell division protein FtsA                                   | NA         | NA                  |
| feature:167713924                  | UDP-3-O-[3-hydroxymyristoyl] N-acetylglucosamine deacetylase | COG0774    | [M]                 |
| feature:167713930                  | Xaa-Pro aminopeptidase                                       | COG0006    | [E]                 |
| feature:167713932                  | hypothetical protein                                         | NA         | NA                  |
| feature:167713936                  | hypothetical protein                                         | NA         | NA                  |
| feature:167713938                  | hypothetical protein                                         | NA         | NA                  |
| feature:167713940                  | Fumarate hydratase class II (Fumarase C)                     | COG0114    | [C]                 |
| feature:167713944                  | Fumarate hydratase class II (Fumarase C)                     | COG0114    | [C]                 |
| feature:167713948                  | hypothetical protein                                         | NA         | NA                  |
| feature:167713950                  | T4-like clamp loader subunit                                 | COG0470    | [L]                 |
| feature:167713952                  | hypothetical protein                                         | NA         | NA                  |
| feature:167713954                  | hypothetical protein                                         | NA         | NA                  |
| feature:167713956                  | hypothetical protein                                         | NA         | NA                  |
| feature:167713958                  | beta-lactamase                                               | COG1680    | [V]                 |
| feature:167713960                  | hypothetical protein                                         | NA         | NA                  |
| feature:167713962                  | hypothetical protein                                         | NA         | NA                  |
| feature:167713964                  | hypothetical protein                                         | NA         | NA                  |
| feature:167713966                  | hypothetical protein                                         | NA         | NA                  |
| feature:167713970                  | hypothetical protein                                         | NA         | NA                  |
| feature:167713972                  | hypothetical protein                                         | NA         | NA                  |
| feature:167713974                  | hypothetical protein                                         | NA         | NA                  |
| feature:167713982                  | probable integral membrane proteinase                        | COG0330    | [O]                 |
| feature:167713986                  | periplasmic serine protease DO-like precursor                | COG0265    | [O]                 |
| feature:167714002                  | rod shape-determining protein MreD                           | NA         | NA                  |
| feature:167714014                  | putative SAM-dependent methyltransferase                     | COG0500    | [QR]                |
| feature:167714022                  | LysE type translocator                                       | NA         | NA                  |
| feature:167714058                  | hypothetical protein                                         | NA         | NA                  |
| feature:167714060                  | pyrroline-5-carboxylate reductase                            | COG0345    | [E]                 |
| feature:167714076                  | hypothetical protein                                         | NA         | NA                  |

|                   |                                                                                           |         |      |
|-------------------|-------------------------------------------------------------------------------------------|---------|------|
| feature:167714078 | pyrroline-5-carboxylate reductase                                                         | COG0345 | [E]  |
| feature:167714096 | hypothetical protein                                                                      | NA      | NA   |
| feature:167714110 | X-Pro dipeptidase                                                                         | COG0006 | [E]  |
| feature:167714112 | spermidine/putrescine transport ATP-binding protein                                       | COG3842 | [E]  |
| feature:167714134 | putative protein of unknown function (DUF989)                                             | COG3748 | [S]  |
| feature:167714136 | putative cytidine and deoxycytidylate deaminase zinc-binding region                       | COG0590 | [FJ] |
| feature:167714138 | putative aldehyde oxidase and xanthine dehydrogenase molybdopterin binding domain protein | COG4631 | [F]  |
| feature:167714140 | putative aldehyde oxidase and xanthine dehydrogenase molybdopterin binding domain protein | COG4631 | [F]  |
| feature:167714142 | putative FAD binding domain in molybdopterin dehydrogenase                                | COG4630 | [F]  |
| feature:167714144 | putative transthyretin precursor (formerly prealbumin)                                    | COG2351 | [R]  |
| feature:167714146 | conserved hypothetical protein                                                            | COG3195 | [S]  |
| feature:167714148 | putative cytochrome c                                                                     | COG2010 | [C]  |
| feature:167714150 | hypothetical protein Adeh_3104                                                            | COG1975 | [O]  |
| feature:167714152 | XdhC/CoxI family protein                                                                  | COG1975 | [O]  |
| feature:167714154 | hypothetical protein NEISUBOT_02557                                                       | COG1816 | [F]  |
| feature:167714156 | ureidoglycolate hydrolase                                                                 | COG3194 | [F]  |
| feature:167714158 | putative allantoicase                                                                     | COG4266 | [F]  |
| feature:167714160 | putative polysaccharide deacetylase family protein                                        | COG0726 | [G]  |
| feature:167714178 | AFG1-like ATPase                                                                          | NA      | NA   |
| feature:167714190 | hypothetical protein                                                                      | NA      | NA   |
| feature:167717472 | NAD-dependent epimerase/dehydratase                                                       | COG0451 | [MG] |
| feature:167717474 | hypothetical protein                                                                      | NA      | NA   |
| feature:167717476 | hypothetical protein                                                                      | NA      | NA   |
| feature:167717482 | HemK                                                                                      | COG2890 | [J]  |
| feature:167717514 | cytochrome C                                                                              | COG3474 | [C]  |
| feature:167717530 | hypothetical protein PU1002_03846                                                         | NA      | NA   |
| feature:167717574 | hypothetical protein PU1002_03956                                                         | NA      | NA   |
| feature:167717576 | hypothetical protein SAR11_0474                                                           | NA      | NA   |
| feature:167717580 | deoxycytidine triphosphate deaminase                                                      | COG0717 | [F]  |
| feature:167717582 | hypothetical protein SAR11_0470                                                           | NA      | NA   |
| feature:167717584 | hypothetical protein                                                                      | NA      | NA   |
| feature:167717586 | Glycosyl transferase family 2                                                             | COG0463 | [M]  |
| feature:167717588 | hypothetical protein                                                                      | NA      | NA   |
| feature:167717590 | hypothetical protein WH5701_14161                                                         | NA      | NA   |
| feature:167717592 | perosamine synthetase                                                                     | COG0399 | [M]  |
| feature:167717594 | deoxycytidine triphosphate deaminase                                                      | COG0717 | [F]  |
| feature:167717598 | glycosyl transferase family protein                                                       | COG0463 | [M]  |
| feature:167717600 | DegT/DnrJ/EryC1/StrS aminotransferase                                                     | NA      | NA   |
| feature:167717602 | hypothetical protein                                                                      | NA      | NA   |
| feature:167717604 | hypothetical protein                                                                      | NA      | NA   |
| feature:167717606 | hypothetical protein                                                                      | NA      | NA   |
| feature:167717608 | hypothetical protein                                                                      | NA      | NA   |
| feature:167717610 | Dolichyl-phosphate beta-D-mannosyltransferase                                             | COG0463 | [M]  |
| feature:167717614 | hypothetical protein                                                                      | NA      | NA   |
| feature:167717616 | deoxycytidine triphosphate deaminase                                                      | COG0717 | [F]  |
| feature:167717622 | ribosomal protein L34 (rpmH)                                                              | NA      | NA   |
| feature:167717640 | nuclear protein SET                                                                       | COG2940 | [R]  |
| feature:167717642 | tRNA pseudouridine synthase A                                                             | COG0101 | [J]  |
| feature:167717650 | hypothetical protein                                                                      | NA      | NA   |

|                   |                                                                                  |         |      |
|-------------------|----------------------------------------------------------------------------------|---------|------|
| feature:167717652 | hypothetical protein PU1002_04056                                                | NA      | NA   |
| feature:167717658 | BolA-like protein                                                                | NA      | NA   |
| feature:167717662 | Cobalamin biosynthesis protein CobS                                              | COG0714 | [R]  |
| feature:167717688 | translation initiation factor IF-3                                               | COG0290 | [J]  |
| feature:167717696 | nucleoside-diphosphate-sugar epimerase                                           | COG0451 | [MG] |
| feature:167717766 | hypothetical protein PU1002_04341                                                | COG3807 | [S]  |
| feature:167717780 | polyribonucleotide nucleotidyltransferase                                        | COG1185 | [J]  |
| feature:167717782 | hypothetical protein                                                             | NA      | NA   |
| feature:167717784 | polyribonucleotide nucleotidyltransferase                                        | COG1185 | [J]  |
| feature:167717796 | S-adenosylmethionine synthetase                                                  | COG0192 | [H]  |
| feature:167717798 | S-adenosylmethionine synthetase                                                  | COG0192 | [H]  |
| feature:167717812 | polysaccharide deacetylase                                                       | COG0726 | [G]  |
| feature:167717826 | phospholipid-binding domain-containing protein                                   | NA      | NA   |
| feature:167717840 | Chaperone protein                                                                | COG0484 | [O]  |
| feature:167717866 | hypothetical protein                                                             | NA      | NA   |
| feature:167717872 | ParA family ATPase for plasmid partitioning and ot her plasmid related functions | COG1192 | [D]  |
| feature:167717874 | ParA family ATPase for plasmid partitioning and ot her plasmid related functions | COG1192 | [D]  |
| feature:167717876 | Glucose inhibited division protein                                               | COG0357 | [M]  |
| feature:167717890 | ferrochelatae                                                                    | COG0276 | [H]  |
| feature:167717894 | hypothetical protein                                                             | NA      | NA   |
| feature:167719272 | Phage integrase                                                                  | NA      | NA   |
| feature:167719274 | hypothetical protein                                                             | NA      | NA   |
| feature:167719276 | hypothetical protein                                                             | NA      | NA   |
| feature:167719278 | hypothetical protein                                                             | NA      | NA   |
| feature:167719280 | hypothetical protein                                                             | NA      | NA   |
| feature:167719282 | hypothetical protein                                                             | NA      | NA   |
| feature:167719284 | hypothetical protein                                                             | NA      | NA   |
| feature:167719286 | N-6 DNA methylase                                                                | COG0286 | [V]  |
| feature:167719288 | type I restriction-modification system specificity subunit                       | NA      | NA   |
| feature:167719290 | type I site-specific deoxyribonuclease HsdR famil y protein                      | COG0610 | [V]  |
| feature:167719292 | hypothetical protein                                                             | NA      | NA   |
| feature:167719294 | HsdR family type I site-specific deoxyribonuclease                               | COG0610 | [V]  |
| feature:167719296 | hypothetical protein                                                             | NA      | NA   |
| feature:167719310 | hypothetical protein                                                             | NA      | NA   |
| feature:167719314 | N6-adenine-specific methylase                                                    | COG0742 | [L]  |
| feature:167719332 | hypothetical protein SAR11_0144                                                  | NA      | NA   |
| feature:167719338 | hypothetical protein MB2181_02345                                                | NA      | NA   |
| feature:167719342 | transcriptional regulator                                                        | COG1733 | [K]  |
| feature:167719358 | surfeit locus protein 1                                                          | COG3346 | [S]  |
| feature:167719360 | electron transport protein SCO1/SenC                                             | COG1999 | [R]  |
| feature:167719362 | COG1845: Heme/copper-type cytochrome/quinol oxidase subunit 3                    | NA      | NA   |
| feature:167719370 | hypothetical protein GP2143_03903                                                | COG5605 | [S]  |
| feature:167719372 | hypothetical protein                                                             | NA      | NA   |
| feature:167719384 | ribonuclease H (RNase H)                                                         | COG0328 | [L]  |
| feature:167719388 | 4-hydroxy-3-methylbut-2-enyl diphosphate reductase                               | COG0761 | [IM] |
| feature:167719422 | 4-diphosphocytidyl-2-C-methyl-D-erythritol kinase                                | NA      | NA   |
| feature:167719436 | ubiquinol-cytochrome-c reductase                                                 | COG2857 | [C]  |
| feature:167719484 | putative D-ala D-ala ligase                                                      | COG1181 | [M]  |
| feature:167719486 | carbamoyl-phosphate synthase large chain                                         | COG0458 | [EF] |
| feature:167719488 | carbamoyl-phosphate synthase large chain                                         | COG0458 | [EF] |

|                   |                                                   |         |      |
|-------------------|---------------------------------------------------|---------|------|
| feature:167719492 | Carbamoyl-phosphate synthase large chain          | COG0458 | [EF] |
| feature:167719686 | sulfatase                                         | COG2194 | [R]  |
| feature:167719690 | hypothetical protein                              | NA      | NA   |
| feature:167719706 | hypothetical protein                              | NA      | NA   |
| feature:167719708 | NADPH:quinone reductase                           | COG0604 | [CR] |
| feature:167719712 | hypothetical protein PU1002_00400                 | COG5467 | [S]  |
| feature:167719714 | hypothetical protein                              | NA      | NA   |
| feature:167719718 | dienelactone hydrolase                            | COG0412 | [Q]  |
| feature:167719720 | conserved hypothetical protein                    | NA      | NA   |
| feature:167719724 | hypothetical protein SAR11_1729                   | COG5515 | [S]  |
| feature:167719728 | hypothetical protein                              | NA      | NA   |
| feature:167719732 | hypothetical protein RD1_1866                     | NA      | NA   |
| feature:167719736 | hypothetical protein RSK20926_01912               | COG2072 | [P]  |
| feature:167719744 | hypothetical protein Arad_9834                    | COG2072 | [P]  |
| feature:167719746 | endoribonuclease L-PSP family protein             | COG0251 | [J]  |
| feature:167719748 | hypothetical protein RB2150_08714                 | COG3342 | [S]  |
| feature:167719752 | hypothetical protein                              | NA      | NA   |
| feature:167719754 | hypothetical protein PU1002_00600                 | NA      | NA   |
| feature:167719756 | hypothetical protein PU1002_00605                 | NA      | NA   |
| feature:167719770 | hypothetical protein                              | NA      | NA   |
| feature:167719798 | glutaredoxin                                      | COG0278 | [O]  |
| feature:167719814 | hypothetical protein                              | NA      | NA   |
| feature:167719920 | hypothetical protein PU1002_01000                 | NA      | NA   |
| feature:167719924 | hypothetical protein                              | NA      | NA   |
| feature:167719952 | Novel protein with potential Cupin domain         | COG0662 | [G]  |
| feature:167719986 | recombination protein O                           | NA      | NA   |
| feature:167720012 | hypothetical protein SAR11_1039                   | NA      | NA   |
| feature:167720024 | ribosomal protein L33                             | NA      | NA   |
| feature:167720028 | cytochrome c oxidase assembly protein (isoform 1) | COG1612 | [O]  |
| feature:167720036 | N-acetyl-gamma-glutamyl-phosphate reductase       | COG0002 | [E]  |
| feature:167720038 | hypothetical protein SAR11_1026                   | NA      | NA   |
| feature:167720044 | hypothetical protein                              | NA      | NA   |
| feature:167720052 | hypothetical protein                              | NA      | NA   |
| feature:167720054 | hypothetical protein                              | COG0500 | [QR] |
| feature:167720056 | hypothetical protein BACUNI_00980                 | COG0463 | [M]  |
| feature:167733984 | FeS assembly ATPase SufC                          | COG0396 | [O]  |
| feature:167733990 | alpha/beta hydrolase                              | COG2945 | [R]  |
| feature:167734006 | ThiS family protein                               | NA      | NA   |
| feature:167734022 | ATPase involved in DNA replication initiation     | NA      | NA   |
| feature:167734054 | Guanylate kinase                                  | COG0194 | [F]  |
| feature:167734056 | hypothetical protein                              | NA      | NA   |
| feature:167734086 | hypothetical protein SAR11_0694                   | COG2081 | [R]  |
| feature:167734088 | SlyX                                              | NA      | NA   |
| feature:167734108 | NifU-like domain-containing protein               | COG0822 | [C]  |
| feature:167734140 | glycine cleavage system protein T2                | COG0404 | [E]  |
| feature:167774839 | hypothetical protein                              | NA      | NA   |
| feature:167774841 | hypothetical protein                              | NA      | NA   |
| feature:167774843 | hypothetical protein                              | NA      | NA   |
| feature:167774845 | hypothetical protein                              | NA      | NA   |
| feature:167774849 | isocitrate dehydrogenase                          | COG0538 | [C]  |
| feature:167774859 | FtsJ-like methyltransferase                       | COG0293 | [J]  |
| feature:167774869 | hypothetical protein MBMO_EB80-69G07.0030         | COG0861 | [P]  |
| feature:167774885 | glycine dehydrogenase                             | COG0403 | [E]  |

|                   |                                                  |         |       |
|-------------------|--------------------------------------------------|---------|-------|
| feature:16774891  | putative glycine cleavage system P-protein       | COG1003 | [E]   |
| feature:167818776 | SurA-like protein                                | NA      | NA    |
| feature:167818778 | hypothetical SurA-like protein                   | NA      | NA    |
| feature:167818792 | lipid-A-disaccharide synthase (lpxB)             | COG0763 | [M]   |
| feature:167818804 | outer membrane protein                           | NA      | NA    |
| feature:167818808 | phosphatidate cytidyltransferase                 | NA      | NA    |
| feature:167818812 | Ribosome recycling factor                        | COG0233 | [J]   |
| feature:167818814 | Ribosome recycling factor                        | COG0233 | [J]   |
| feature:167818816 | protein translation elongation factor Ts (EF-Ts) | COG0264 | [J]   |
| feature:167818820 | DNA polymerase III alpha subunit                 | COG0587 | [L]   |
| feature:167818834 | biotin-protein ligase                            | NA      | NA    |
| feature:167818836 | biotin-protein ligase                            | COG0340 | [H]   |
| feature:167818872 | hypothetical protein                             | NA      | NA    |
| feature:167818878 | hypothetical protein SAR11_0877                  | COG3313 | [R]   |
| feature:167818880 | possible transmembrane protein                   | NA      | NA    |
| feature:167818884 | hypothetical protein PU1002_02026                | NA      | NA    |
| feature:167818906 | TerC family integral membrane protein            | COG0861 | [P]   |
| feature:167818908 | short chain dehydrogenase                        | COG1028 | [IQR] |
| feature:167818910 | L-xylulose reductase                             | COG1028 | [IQR] |
| feature:167818918 | putative membrane protein                        | COG0390 | [R]   |
| feature:167818920 | hypothetical protein mll5080                     | NA      | NA    |
| feature:167818922 | hypothetical protein                             | NA      | NA    |
| feature:167818924 | hypothetical protein                             | NA      | NA    |
| feature:167818926 | integrase family protein                         | COG0582 | [L]   |
| feature:167818928 | hypothetical protein SAR11_1220                  | NA      | NA    |
| feature:167818930 | sarcosine dehydrogenase                          | COG0404 | [E]   |
| feature:167818932 | ATP-binding component of ABC transporter         | COG1131 | [V]   |
| feature:167818934 | ATP-binding component of ABC transporter         | COG1131 | [V]   |
| feature:167818938 | sarcosine dehydrogenase                          | COG0665 | [E]   |
| feature:167818940 | conserved hypothetical protein                   | NA      | NA    |
| feature:167818942 | cytochrome c'                                    | NA      | NA    |
| feature:167818948 | ADP-ribosylglycohydrolase                        | NA      | NA    |
| feature:167818952 | Enoyl-CoA hydratase/isomerase                    | COG1024 | [I]   |
| feature:167818964 | hypothetical protein BAL199_27271                | NA      | NA    |
| feature:167818966 | hypothetical protein CPS_3856                    | COG0730 | [R]   |
| feature:167818968 | gamma-glutamyltranspeptidase                     | COG0405 | [E]   |
| feature:167818970 | gamma-glutamyltransferase                        | COG0405 | [E]   |
| feature:167818972 | Xaa-Pro aminopeptidase                           | COG0006 | [E]   |
| feature:167818974 | Xaa-Pro aminopeptidase                           | COG0006 | [E]   |
| feature:167818976 | Aldehyde Dehydrogenase                           | COG4230 | [C]   |
| feature:167818982 | hypothetical protein MADE_00086                  | COG0730 | [R]   |
| feature:167818984 | COG0607: Rhodanese-related sulfurtransferase     | COG0607 | [P]   |
| feature:167818986 | hypothetical protein SAR11_1230                  | NA      | NA    |
| feature:167818994 | AzIC protein                                     | NA      | NA    |
| feature:167819000 | iron(III) ABC transporter                        | COG1178 | [P]   |
| feature:167819006 | iron(III) ABC transporter                        | COG3842 | [E]   |
| feature:167819008 | iron(III) ABC transporter                        | COG1178 | [P]   |
| feature:167819020 | hypothetical protein SAR11_1247                  | COG3651 | [S]   |
| feature:167819024 | hypothetical protein SAR11_1248                  | NA      | NA    |
| feature:167819028 | hypothetical protein                             | NA      | NA    |
| feature:167819030 | hypothetical protein SAR11_1249                  | NA      | NA    |
| feature:167819038 | dimethylglycine dehydrogenase                    | COG0665 | [E]   |
| feature:167819076 | hypothetical protein RCCS2_14234                 | COG0697 | [GER] |

|                   |                                                                            |         |      |
|-------------------|----------------------------------------------------------------------------|---------|------|
| feature:167819082 | hypothetical protein PU1002_06946                                          | NA      | NA   |
| feature:167819084 | hypothetical protein PU1002_06941                                          | COG2391 | [R]  |
| feature:167819086 | hypothetical protein SAR11_1258                                            | COG2391 | [R]  |
| feature:167819090 | enoyl-CoA hydratase                                                        | COG1024 | [I]  |
| feature:167819094 | iron(III) ABC transporter                                                  | COG1178 | [P]  |
| feature:167819098 | hypothetical protein                                                       | NA      | NA   |
| feature:167819108 | spe:Spro_4738 outer membrane autotransporter barr el domain                | NA      | NA   |
| feature:167819110 | hypothetical protein                                                       | NA      | NA   |
| feature:167819112 | hypothetical protein                                                       | NA      | NA   |
| feature:167819114 | hypothetical protein                                                       | NA      | NA   |
| feature:167819116 | hypothetical protein                                                       | NA      | NA   |
| feature:167819120 | hypothetical protein PU1002_06886                                          | NA      | NA   |
| feature:167819134 | acetyltransferase                                                          | COG0454 | [KR] |
| feature:167819146 | unknown membrane protein                                                   | NA      | NA   |
| feature:167819154 | sarcosine oxidase alpha chain                                              | COG0446 | [R]  |
| feature:167819168 | Phytanoyl-CoA dioxygenase (PhyH) superfamily                               | NA      | NA   |
| feature:167819170 | hypothetical protein                                                       | NA      | NA   |
| feature:167819176 | glycine betaine/l-proline transport ATP-binding protein                    | COG4175 | [E]  |
| feature:167819186 | putative aminomethyltransferase protein                                    | COG3665 | [S]  |
| feature:167819188 | putative aminomethyltransferase protein                                    | COG3665 | [S]  |
| feature:167819192 | ribosomal protein L6e                                                      | NA      | NA   |
| feature:167819216 | ammonium transporter                                                       | COG0004 | [P]  |
| feature:167819340 | unknown membrane protein                                                   | NA      | NA   |
| feature:167819346 | hypothetical protein                                                       | NA      | NA   |
| feature:167819362 | putative N-acetylglucosaminyltransferase                                   | NA      | NA   |
| feature:167819384 | possible Rhodanese-related sulfurtransferase                               | COG0607 | [P]  |
| feature:167819394 | hypothetical protein                                                       | NA      | NA   |
| feature:167819402 | hypothetical protein                                                       | NA      | NA   |
| feature:167819404 | hypothetical protein ALOHA_HF4000007D16ctg1g30                             | COG1670 | [J]  |
| feature:167819408 | 6-aminohexanoate-dimer hydrolase                                           | NA      | NA   |
| feature:167819410 | hypothetical protein OM2255_02972                                          | COG1335 | [Q]  |
| feature:167819412 | conserved hypothetical protein                                             | COG1670 | [J]  |
| feature:167819414 | hypothetical protein ALOHA_HF4000007D16ctg1g30                             | NA      | NA   |
| feature:167819416 | putative thiol-specific antioxidant related protein (thiol peroxidase Bcp) | COG1225 | [O]  |
| feature:167819420 | putative site-specific recombinase phage integrase family protein          | NA      | NA   |
| feature:167819422 | hypothetical protein                                                       | NA      | NA   |
| feature:167866872 | hypothetical protein                                                       | NA      | NA   |
| feature:167866878 | hypothetical protein                                                       | NA      | NA   |
| feature:167866910 | tolR protein                                                               | COG0848 | [U]  |
| feature:167866958 | glycyl-tRNA synthetase subunit alpha                                       | COG0752 | [J]  |
| feature:167866978 | ferredoxin                                                                 | COG0633 | [C]  |
| feature:167866988 | Glycosyl transferase                                                       | COG0463 | [M]  |
| feature:167866994 | hypothetical protein SAR11_0461                                            | NA      | NA   |
| feature:167867010 | isocitrate dehydrogenase                                                   | COG0538 | [C]  |
| feature:167867018 | FtsJ-like methyltransferase                                                | COG0293 | [J]  |
| feature:167867028 | X-Pro dipeptidase                                                          | COG0006 | [E]  |
| feature:167867030 | X-Pro dipeptidase                                                          | COG0006 | [E]  |
| feature:167867032 | putative putrescine ABC transporter ATP-binding protein                    | COG3842 | [E]  |
| feature:167867042 | hypothetical protein SAR11_1332                                            | NA      | NA   |
| feature:167888766 | hypothetical protein Nham_2527                                             | COG0358 | [L]  |
| feature:167888768 | primase/helicase                                                           | NA      | NA   |



|                                   |                                                                                     |            |                     |
|-----------------------------------|-------------------------------------------------------------------------------------|------------|---------------------|
| feature:167888770                 | hypothetical protein                                                                | NA         | NA                  |
| feature:167888772                 | hypothetical protein                                                                | NA         | NA                  |
| feature:167888774                 | hypothetical protein                                                                | NA         | NA                  |
| feature:167888798                 | NADH dehydrogenase subunit G                                                        | NA         | NA                  |
| feature:167888814                 | biotin-protein ligase                                                               | COG0340    | [H]                 |
| feature:167888824                 | hypothetical protein                                                                | NA         | NA                  |
| feature:167888830                 | ABC transporter ATP-binding protein                                                 | COG1136    | [V]                 |
| feature:167888832                 | DNA polymerase III alpha subunit                                                    | COG0587    | [L]                 |
| feature:167888836                 | protein translation elongation factor Ts (EF-Ts)                                    | COG0264    | [J]                 |
| feature:167888838                 | protein translation elongation factor Ts (EF-Ts)                                    | COG0264    | [J]                 |
| feature:167888840                 | Ribosome recycling factor                                                           | COG0233    | [J]                 |
| feature:167888848                 | outer membrane protein                                                              | COG4775    | [M]                 |
| feature:167888862                 | lipid-A-disaccharide synthase (lpxB)                                                | COG0763    | [M]                 |
| feature:167888876                 | hypothetical SurA-like protein                                                      | NA         | NA                  |
| feature:167888884                 | hypothetical protein                                                                | NA         | NA                  |
| feature:167888892                 | septum formation initiator                                                          | NA         | NA                  |
| feature:167907226                 | hypothetical protein                                                                | NA         | NA                  |
| feature:167907280                 | YadG-like ABC transporter protein                                                   | COG1131    | [V]                 |
| feature:167907306                 | prephenate dehydrogenase                                                            | COG0287    | [E]                 |
| feature:167907344                 | H <sup>+</sup> -transporting two-sector ATPase (F0F1-type ATP synthase) delta chain | COG0712    | [C]                 |
| feature:167907374                 | membrane portion of succinate dehydrogenase                                         | NA         | NA                  |
| feature:167907392                 | 3-isopropylmalate dehydratase                                                       | COG0066    | [E]                 |
| feature:167907410                 | hypothetical protein SAR11_0259                                                     | NA         | NA                  |
| feature:167907428                 | hypothetical protein PU1002_05026                                                   | NA         | NA                  |
| feature:167907430                 | membrane protein putative                                                           | NA         | NA                  |
| feature:167907432                 | hypothetical protein PU1002_05016                                                   | NA         | NA                  |
| feature:167907434                 | cytochrome c class IC                                                               | COG2863    | [C]                 |
| feature:167907436                 | hypothetical protein PU1002_05006                                                   | NA         | NA                  |
| feature:167907438                 | L-sorbose dehydrogenase putative                                                    | COG2133    | [G]                 |
| feature:167907444                 | (S)-2-hydroxy-acid oxidase                                                          | COG0277    | [C]                 |
| feature:167907446                 | (S)-2-hydroxy-acid oxidase                                                          | COG0277    | [C]                 |
| feature:167907484                 | polyketide biosynthesis dithiol-disulfide isomerase                                 | COG2761    | [Q]                 |
| feature:167907492                 | marC family protein                                                                 | COG2095    | [U]                 |
| feature:167907496                 | putative transmembrane protein                                                      | COG1238    | [S]                 |
| feature:167907498                 | possible transmembrane protein                                                      | NA         | NA                  |
| feature:167907510                 | hypothetical protein SAR11_1722                                                     | COG0762    | [S]                 |
| feature:167907526                 | hypothetical protein SAR11_1723                                                     | NA         | NA                  |
| feature:167907550                 | hypothetical protein                                                                | NA         | NA                  |
| feature:167907552                 | hypothetical protein                                                                | NA         | NA                  |
| feature:167907576                 | Smr (small MutS related) protein                                                    | COG2840    | [S]                 |
| feature:167907586                 | Dephospho-CoA kinase                                                                | NA         | NA                  |
| feature:167907596                 | ferrochelatase                                                                      | COG0276    | [H]                 |
| feature:167907604                 | Glucose inhibited division protein                                                  | COG0357    | [M]                 |
| feature:167907606                 | ParA family ATPase for plasmid partitioning and other plasmid related functions     | COG1192    | [D]                 |
| feature:167907612                 | hypothetical protein SAR11_0356                                                     | NA         | NA                  |
| <b>Genes specific to ACE_P3.2</b> |                                                                                     |            |                     |
| <b>Gene ID</b>                    | <b>Annotation</b>                                                                   | <b>COG</b> | <b>COG Category</b> |
| feature:167687112                 | putative short-chain dehydrogenase/reductase                                        | COG1028    | [IQR]               |
| feature:167687114                 | hypothetical protein PROVRETT_00056                                                 | COG2079    | [R]                 |
| feature:167687118                 | hypothetical protein                                                                | NA         | NA                  |

|                   |                                                                                        |         |      |
|-------------------|----------------------------------------------------------------------------------------|---------|------|
| feature:167687122 | hypothetical protein                                                                   | NA      | NA   |
| feature:167687128 | hypothetical protein GP2143_10052                                                      | NA      | NA   |
| feature:167687130 | Bacterial extracellular solute-binding protein, family 5                               | COG0747 | [E]  |
| feature:167687132 | extracellular solute-binding protein, family 5                                         | COG0747 | [E]  |
| feature:167687134 | binding-protein-dependent transport systems inner membrane component                   | COG0601 | [EP] |
| feature:167687136 | ABC transporter, permease protein, putative                                            | COG1173 | [EP] |
| feature:167687140 | oligopeptide ATP-binding ABC transporter protein                                       | COG4608 | [E]  |
| feature:167687142 | oligopeptide/dipeptide ABC transporter, ATP-binding protein, C-terminal domain protein | COG4608 | [E]  |
| feature:167687144 | Succinylglutamate desuccinylase/aspartoacylase                                         | NA      | NA   |
| feature:167687146 | putative hydrolase                                                                     | COG3741 | [E]  |
| feature:167687148 | amidohydrolase                                                                         | COG1473 | [R]  |
| feature:167687150 | peptidase M20D, amidohydrolase                                                         | COG1473 | [R]  |
| feature:167687152 | hypothetical protein SAR11_0694                                                        | COG2081 | [R]  |
| feature:167687154 | hypothetical protein                                                                   | NA      | NA   |
| feature:167687162 | penicillin-binding protein 1A                                                          | COG5009 | [M]  |
| feature:167687164 | Penicillin-binding protein 1A                                                          | COG5009 | [M]  |
| feature:167687200 | hypothetical protein                                                                   | NA      | NA   |
| feature:167687204 | carboxymuconolactone decarboxylase family protein                                      | COG0599 | [S]  |
| feature:167687208 | dihydroorotase                                                                         | COG0044 | [F]  |
| feature:167687212 | sulfate permease family protein                                                        | COG0659 | [P]  |
| feature:167687218 | radical SAM domain-containing protein                                                  | COG0535 | [R]  |
| feature:167687224 | hypothetical protein                                                                   | NA      | NA   |
| feature:167687226 | hypothetical protein                                                                   | NA      | NA   |
| feature:167687232 | hypothetical protein                                                                   | NA      | NA   |
| feature:167687236 | alternative oxidase 2                                                                  | NA      | NA   |
| feature:167687238 | hypothetical protein                                                                   | NA      | NA   |
| feature:167687240 | hypothetical protein PB7211_523                                                        | NA      | NA   |
| feature:167687244 | hypothetical protein                                                                   | NA      | NA   |
| feature:167687246 | hypothetical protein                                                                   | NA      | NA   |
| feature:167687248 | hypothetical protein Pnap_3934                                                         | NA      | NA   |
| feature:167687250 | hypothetical protein P9515_00371                                                       | COG4889 | [R]  |
| feature:167687252 | hypothetical protein                                                                   | NA      | NA   |
| feature:167687254 | hypothetical protein                                                                   | NA      | NA   |
| feature:167687256 | hypothetical protein                                                                   | NA      | NA   |
| feature:167687258 | hypothetical protein                                                                   | NA      | NA   |
| feature:167687260 | hypothetical protein PU1002_00600                                                      | NA      | NA   |
| feature:167687262 | hypothetical protein                                                                   | NA      | NA   |
| feature:167687294 | hypothetical protein                                                                   | NA      | NA   |
| feature:167687298 | immunogenic protein                                                                    | COG2358 | [R]  |
| feature:167687306 | hypothetical protein                                                                   | NA      | NA   |
| feature:167687308 | hypothetical protein                                                                   | NA      | NA   |
| feature:167687322 | NADH dehydrogenase I chain E                                                           | COG1905 | [C]  |
| feature:167687336 | NADH dehydrogenase i chain I                                                           | COG1009 | [CP] |
| feature:167687338 | NADH Dehydrogenase I Chain L                                                           | COG1009 | [CP] |
| feature:167687340 | hypothetical protein                                                                   | NA      | NA   |
| feature:167687342 | NADH dehydrogenase subunit M                                                           | COG1008 | [C]  |
| feature:167687344 | NADH dehydrogenase subunit N                                                           | COG1007 | [C]  |
| feature:167687380 | 1-deoxy-D-xylulose 5-phosphate reductoisomerase                                        | COG0743 | [I]  |
| feature:167687384 | COG1044: UDP-3-O-[3-hydroxymyristoyl] glucosamine N-acyltransferase                    | NA      | NA   |
| feature:167687392 | lipid-A-disaccharide synthase (lpxB)                                                   | COG0763 | [M]  |
| feature:167730502 | uroporphyrinogen III synthase HEM4                                                     | NA      | NA   |

|                   |                                                                      |         |        |
|-------------------|----------------------------------------------------------------------|---------|--------|
| feature:167730510 | hypothetical protein PMM1242                                         | NA      | NA     |
| feature:167730512 | methylase involved in ubiquinone/menaquinone biosynthesis            | NA      | NA     |
| feature:167730514 | hypothetical protein PMM1249                                         | NA      | NA     |
| feature:167730520 | hypothetical protein                                                 | NA      | NA     |
| feature:167730544 | hypothetical protein Mmar10_2939                                     | COG2835 | [S]    |
| feature:167730594 | hypothetical protein                                                 | NA      | NA     |
| feature:167730596 | hypothetical protein                                                 | NA      | NA     |
| feature:167730602 | COX RNA-associated protein                                           | COG0486 | [R]    |
| feature:167730618 | leucyl-tRNA synthetase                                               | COG0495 | [J]    |
| feature:167730646 | hypothetical protein                                                 | NA      | NA     |
| feature:167730648 | hypothetical protein                                                 | NA      | NA     |
| feature:167730674 | hypothetical protein                                                 | NA      | NA     |
| feature:167730678 | hypothetical protein                                                 | NA      | NA     |
| feature:167730684 | hypothetical protein                                                 | NA      | NA     |
| feature:167730714 | hypothetical protein                                                 | NA      | NA     |
| feature:167730716 | hypothetical protein                                                 | NA      | NA     |
| feature:167730718 | hypothetical protein                                                 | NA      | NA     |
| feature:167730724 | molybdopterin biosynthesis protein                                   | COG0476 | [H]    |
| feature:167730758 | hypothetical protein                                                 | COG1131 | [V]    |
| feature:167730764 | YadG-like ABC transporter protein                                    | COG0258 | [L]    |
| feature:167730766 | DNA polymerase I                                                     | COG0749 | [L]    |
| feature:167730768 | DNA polymerase I                                                     | NA      | NA     |
| feature:167730770 | DNA polymerase I                                                     | COG0749 | [L]    |
| feature:167730788 | hypothetical protein                                                 | NA      | NA     |
| feature:167730800 | hypothetical protein                                                 | NA      | NA     |
| feature:167730810 | major facilitator superfamily protein                                | COG0477 | [GEPR] |
| feature:167730812 | putative sugar (and other) transporter                               | COG0477 | [GEPR] |
| feature:167730836 | fumarylacetoacetate (FAA) hydrolase family protein                   | NA      | NA     |
| feature:167730840 | putative membrane protein                                            | NA      | NA     |
| feature:167730864 | P0A3K3 YDNAA_RICMO Uncharacterized protein in dnaA 5' region         | COG0607 | [P]    |
| feature:167730866 | hypothetical protein                                                 | NA      | NA     |
| feature:167730886 | conserved hypothetical protein                                       | NA      | NA     |
| feature:167730890 | 2-oxo-acid dehydrogenase E1 subunit, homodimeric type                | COG2609 | [C]    |
| feature:167730892 | 2-oxo-acid dehydrogenase E1 subunit, homodimeric type                | COG2609 | [C]    |
| feature:167730912 | GntR family transcriptional regulator                                | COG1802 | [K]    |
| feature:167730922 | membrane protein, putative                                           | COG2358 | [R]    |
| feature:167730924 | O-methyl transferase                                                 | NA      | NA     |
| feature:167730926 | hypothetical protein                                                 | NA      | NA     |
| feature:167730934 | phosphate ABC transporter                                            | COG0226 | [P]    |
| feature:167730950 | extracellular solute-binding protein, family 1                       | COG1840 | [P]    |
| feature:167730952 | Binding-protein-dependent transport systems inner membrane component | COG1178 | [P]    |
| feature:167730966 | protein of unknown function DUF47                                    | COG1392 | [P]    |
| feature:167730984 | hypothetical protein ALOHA_HF4000133G03ctg1g2                        | NA      | NA     |
| feature:167730986 | hypothetical protein ALOHA_HF4000133G03ctg1g2                        | COG0665 | [E]    |
| feature:167730992 | acetylornithine aminotransferase                                     | COG4992 | [E]    |
| feature:167731028 | hypothetical protein                                                 | NA      | NA     |
| feature:167731030 | hypothetical protein                                                 | NA      | NA     |
| feature:167731064 | hypothetical protein                                                 | NA      | NA     |
| feature:167731066 | hypothetical protein                                                 | NA      | NA     |
| feature:167731068 | putative beta-ketoacyl-acyl-carrier-protein reductase (fabG-like)    | COG1028 | [IQR]  |

|                   |                                                                                                                                       |         |      |
|-------------------|---------------------------------------------------------------------------------------------------------------------------------------|---------|------|
| feature:167731070 | Beta-ketoacyl-acyl-carrier-protein synthase I                                                                                         | COG0332 | [I]  |
| feature:167731072 | hypothetical protein                                                                                                                  | NA      | NA   |
| feature:167731074 | hypothetical protein                                                                                                                  | NA      | NA   |
| feature:167731076 | aminopeptidase domain protein                                                                                                         | COG4310 | [R]  |
| feature:167731078 | hypothetical protein RS9917_04675                                                                                                     | COG0223 | [J]  |
| feature:167731080 | hypothetical protein                                                                                                                  | NA      | NA   |
| feature:167731082 | acylneuraminate cytidyltransferase                                                                                                    | COG1861 | [M]  |
| feature:167731084 | polysaccharide biosynthesis protein CapD                                                                                              | COG1086 | [MG] |
| feature:167731086 | N-acetylneuraminate synthase                                                                                                          | NA      | NA   |
| feature:167731088 | hypothetical protein                                                                                                                  | NA      | NA   |
| feature:167731090 | hypothetical protein                                                                                                                  | NA      | NA   |
| feature:167731092 | N-acetylneuraminate synthase                                                                                                          | COG2089 | [M]  |
| feature:167731094 | hypothetical dTDP-4-dehydrorhamnose reductase                                                                                         | COG1091 | [M]  |
| feature:167731096 | hypothetical protein                                                                                                                  | NA      | NA   |
| feature:167731098 | hypothetical protein Ddes_0146                                                                                                        | COG4310 | [R]  |
| feature:167731100 | hypothetical protein                                                                                                                  | NA      | NA   |
| feature:167731102 | dTDP-glucose 4,6-dehydratase                                                                                                          | COG0451 | [MG] |
| feature:167731104 | hypothetical protein                                                                                                                  | NA      | NA   |
| feature:167731106 | hypothetical protein                                                                                                                  | NA      | NA   |
| feature:167731108 | hypothetical protein                                                                                                                  | NA      | NA   |
| feature:167731110 | glycosyltransferase group 2 family protein                                                                                            | COG0463 | [M]  |
| feature:167731112 | hypothetical protein                                                                                                                  | NA      | NA   |
| feature:167731114 | glycosyl transferase family protein                                                                                                   | COG0463 | [M]  |
| feature:167731116 | hypothetical protein                                                                                                                  | NA      | NA   |
| feature:167731118 | hypothetical protein                                                                                                                  | NA      | NA   |
| feature:167731122 | hypothetical protein SAR11_0567                                                                                                       | COG0472 | [M]  |
| feature:167731124 | hypothetical protein                                                                                                                  | NA      | NA   |
| feature:167731126 | TDP-4-oxo-6-deoxy-D-glucose transaminase                                                                                              | COG0399 | [M]  |
| feature:167731128 | hypothetical protein P9515_12791                                                                                                      | NA      | NA   |
| feature:167731132 | hypothetical protein PBCV1_A295L                                                                                                      | COG0451 | [MG] |
| feature:167731136 | Glycosyl transferase, family 2                                                                                                        | COG0463 | [M]  |
| feature:167731138 | hypothetical protein                                                                                                                  | NA      | NA   |
| feature:167731140 | glycosyl transferase group 1                                                                                                          | NA      | NA   |
| feature:167731142 | dTDP-glucose 4,6-dehydratase                                                                                                          | COG1088 | [M]  |
| feature:167731144 | hypothetical protein                                                                                                                  | NA      | NA   |
| feature:167731148 | Carbamoyltransferase                                                                                                                  | COG2192 | [O]  |
| feature:167731150 | hypothetical protein                                                                                                                  | NA      | NA   |
| feature:167731152 | hypothetical protein                                                                                                                  | NA      | NA   |
| feature:167731154 | hypothetical protein                                                                                                                  | NA      | NA   |
| feature:167731156 | lipoprotein                                                                                                                           | NA      | NA   |
| feature:167731158 | hypothetical protein VspiD_05775                                                                                                      | NA      | NA   |
| feature:167731160 | NAD-dependent epimerase/dehydratase                                                                                                   | COG0451 | [MG] |
| feature:167731162 | hypothetical protein                                                                                                                  | NA      | NA   |
| feature:167731164 | glycosyl transferase family protein                                                                                                   | COG0463 | [M]  |
| feature:167731196 | hypothetical protein                                                                                                                  | NA      | NA   |
| feature:167731208 | probable glycosyltransferase protein                                                                                                  | COG0463 | [M]  |
| feature:167731210 | glycosyl transferase family protein                                                                                                   | COG0463 | [M]  |
| feature:167731212 | hypothetical protein                                                                                                                  | NA      | NA   |
| feature:167731214 | methyltransferase type 12                                                                                                             | NA      | NA   |
| feature:167731216 | hypothetical protein                                                                                                                  | NA      | NA   |
| feature:167731218 | NAD-dependent epimerase/dehydratase                                                                                                   | NA      | NA   |
| feature:167731222 | syn:SynRCC307_2084 mrp; ATPases involved in chromosome partitioning; K03593 ATP-binding protein involved in c chromosome partitioning | COG0489 | [D]  |

|                   |                                                         |         |       |
|-------------------|---------------------------------------------------------|---------|-------|
| feature:167731248 | rod shape-determining protein MreC                      | NA      | NA    |
| feature:167731258 | hypothetical protein                                    | NA      | NA    |
| feature:167774671 | glutamate dehydrogenase                                 | COG0334 | [E]   |
| feature:167774673 | anti-ECFsigma factor, ChrR                              | COG3806 | [T]   |
| feature:167774675 | OsmC family protein                                     | COG1073 | [R]   |
| feature:167774677 | hypothetical protein                                    | NA      | NA    |
| feature:167774679 | hypothetical protein                                    | NA      | NA    |
| feature:167774681 | hypothetical protein                                    | NA      | NA    |
| feature:167774683 | COG3152: Uncharacterized membrane protein               | COG3152 | [S]   |
| feature:167774685 | hypothetical protein                                    | NA      | NA    |
| feature:167774687 | intracellular protease/amidase, putative                | COG0693 | [R]   |
| feature:167774689 | hypothetical protein                                    | NA      | NA    |
| feature:167774693 | thiamine biosynthesis protein ThiS                      | COG2104 | [H]   |
| feature:167774727 | hypothetical protein                                    | NA      | NA    |
| feature:167774733 | hypothetical protein                                    | NA      | NA    |
| feature:167774755 | hypothetical protein                                    | NA      | NA    |
| feature:167774759 | amidophosphoribosyltransferase                          | COG0034 | [F]   |
| feature:167774773 | hypothetical protein                                    | NA      | NA    |
| feature:167774787 | ADP-heptose:LPS heptosyltransferase, putative           | NA      | NA    |
| feature:167774789 | Q8RFJ8 SYA_FUSNN Alanyl-tRNA synthetase                 | COG0013 | [J]   |
| feature:167774791 | hypothetical protein                                    | NA      | NA    |
| feature:167774793 | alanyl-tRNA synthetase                                  | COG0013 | [J]   |
| feature:167774827 | hypothetical protein                                    | COG0365 | [I]   |
| feature:167816100 | hypothetical protein                                    | NA      | NA    |
| feature:167816108 | protein-L-isoaspartate(D-aspartate) O-methyltransferase | COG2518 | [O]   |
| feature:167816110 | hypothetical protein                                    | NA      | NA    |
| feature:167816112 | valine-tRNA ligase                                      | COG0525 | [J]   |
| feature:167816114 | valyl-tRNA synthetase                                   | COG0525 | [J]   |
| feature:167816116 | valine-tRNA ligase                                      | COG0525 | [J]   |
| feature:167816130 | COG0018: Arginyl-tRNA synthetase                        | COG0018 | [J]   |
| feature:167816134 | hypothetical protein                                    | NA      | NA    |
| feature:167816146 | COG0172: Seryl-tRNA synthetase                          | COG0172 | [J]   |
| feature:167816154 | putative SinH-like protein                              | NA      | NA    |
| feature:167816156 | hypothetical protein                                    | NA      | NA    |
| feature:167816158 | hypothetical protein                                    | NA      | NA    |
| feature:167816160 | membrane-bound lytic transglycolase-related protein     | COG2951 | [M]   |
| feature:167816174 | hypothetical protein                                    | NA      | NA    |
| feature:167816196 | putative transmembrane transport protein                | COG1133 | [I]   |
| feature:167816202 | hypothetical protein                                    | NA      | NA    |
| feature:167816206 | protein-export membrane protein SecD                    | COG0342 | [U]   |
| feature:167824446 | hypothetical protein                                    | NA      | NA    |
| feature:167824462 | hypothetical protein                                    | NA      | NA    |
| feature:167824466 | hypothetical protein                                    | NA      | NA    |
| feature:167824468 | hypothetical protein ALOHA_HF4000005I08ctg1g18          | NA      | NA    |
| feature:167824470 | hypothetical protein                                    | NA      | NA    |
| feature:167824472 | ATP-dependent RNA helicase                              | COG0513 | [LKJ] |
| feature:167824476 | hypothetical protein                                    | NA      | NA    |
| feature:167824484 | hypothetical protein                                    | NA      | NA    |
| feature:167824492 | conserved hypothetical protein                          | COG3564 | [S]   |
| feature:167824504 | hypothetical protein PU1002_02296                       | NA      | NA    |
| feature:167824514 | hypothetical protein                                    | NA      | NA    |
| feature:167824526 | nitrogen regulatory protein P-II                        | COG0347 | [E]   |
| feature:167824540 | hypothetical protein                                    | NA      | NA    |

|                   |                                                                          |         |       |
|-------------------|--------------------------------------------------------------------------|---------|-------|
| feature:167824548 | COG3114: Heme exporter protein D                                         | COG3114 | [U]   |
| feature:167824556 | hypothetical protein Meso_3181                                           | COG0730 | [R]   |
| feature:167824572 | hypothetical protein OG2516_00624                                        | COG2079 | [R]   |
| feature:167824590 | hypothetical protein                                                     | NA      | NA    |
| feature:167824598 | hypothetical protein Arad_2918                                           | COG2120 | [S]   |
| feature:167824600 | hypothetical protein MED297_02905                                        | COG0684 | [H]   |
| feature:167824610 | hypothetical protein BAL199_08298                                        | COG2175 | [Q]   |
| feature:167824618 | Fumarate reductase/succinate dehydrogenase flavoprotein-like protein     | COG1053 | [C]   |
| feature:167824620 | hypothetical protein                                                     | NA      | NA    |
| feature:167824628 | MmgE/PrpD family protein                                                 | NA      | NA    |
| feature:167824630 | bur:Bcep18194_B1382 hypothetical protein                                 | NA      | NA    |
| feature:167824632 | hypothetical protein                                                     | NA      | NA    |
| feature:167824662 | MarR family transcriptional regulator                                    | NA      | NA    |
| feature:167824668 | alkyl hydroperoxide reductase/ Thiol specific anti oxidant/ Mal allergen | COG0450 | [O]   |
| feature:167824674 | hypothetical protein                                                     | NA      | NA    |
| feature:167824692 | hypothetical protein                                                     | NA      | NA    |
| feature:167824696 | probable aminopeptidase                                                  | COG0006 | [E]   |
| feature:167824718 | hypothetical protein                                                     | NA      | NA    |
| feature:167824722 | UDP-N-acetylmuramoyl-L-alanyl-D-glutamate synthetase                     | COG0771 | [M]   |
| feature:167824724 | hypothetical protein                                                     | NA      | NA    |
| feature:167824740 | hypothetical protein                                                     | NA      | NA    |
| feature:167824760 | hypothetical protein                                                     | NA      | NA    |
| feature:167824764 | hypothetical protein                                                     | NA      | NA    |
| feature:167824766 | hypothetical protein                                                     | NA      | NA    |
| feature:167824770 | carbamoyl-phosphate synthase large chain                                 | COG0458 | [EF]  |
| feature:167824772 | carbamoyl-phosphate synthase large subunit                               | COG0458 | [EF]  |
| feature:167824774 | carbamoyl-phosphate synthase, large subunit                              | COG0458 | [EF]  |
| feature:167824786 | excinuclease ABC, B subunit                                              | COG0556 | [L]   |
| feature:167824788 | excinuclease ABC, B subunit                                              | COG0556 | [L]   |
| feature:167824790 | short chain dehydrogenase                                                | COG1028 | [IQR] |
| feature:167824792 | 3-oxoacyl-(acyl-carrier protein) reductase                               | COG1028 | [IQR] |
| feature:167824798 | hypothetical protein                                                     | NA      | NA    |
| feature:167824836 | hypothetical protein                                                     | NA      | NA    |
| feature:167824842 | COG0617: tRNA nucleotidyltransferase/poly(A) polymerase                  | COG0617 | [J]   |
| feature:167824874 | hypothetical protein                                                     | NA      | NA    |
| feature:167824876 | COG0711: F0F1-type ATP synthase b subunit                                | NA      | NA    |
| feature:167824878 | hypothetical protein                                                     | NA      | NA    |
| feature:167824894 | threonine synthase                                                       | COG0498 | [E]   |
| feature:167824896 | surfeit locus protein 1                                                  | COG3346 | [S]   |
| feature:167824902 | hypothetical protein                                                     | NA      | NA    |
| feature:167824908 | putative modulator of DNA gyrase                                         | COG0312 | [R]   |
| feature:167824912 | putative modulator of DNA gyrase                                         | COG0312 | [R]   |
| feature:167824952 | RNA pseudouridine synthase family protein                                | COG1187 | [J]   |
| feature:167824962 | isoleucyl-tRNA synthetase                                                | COG0060 | [J]   |
| feature:167824972 | hypothetical protein                                                     | NA      | NA    |
| feature:167824974 | methyltransferase FkbM family                                            | COG0500 | [QR]  |
| feature:167824976 | hypothetical protein                                                     | NA      | NA    |
| feature:167824978 | hypothetical protein                                                     | NA      | NA    |
| feature:167824980 | hypothetical protein                                                     | NA      | NA    |
| feature:167824982 | hypothetical protein                                                     | NA      | NA    |

|                   |                                                                    |         |        |
|-------------------|--------------------------------------------------------------------|---------|--------|
| feature:167824984 | hypothetical protein                                               | NA      | NA     |
| feature:167824986 | hypothetical protein                                               | NA      | NA     |
| feature:167824988 | hypothetical protein                                               | NA      | NA     |
| feature:167824990 | hypothetical protein                                               | NA      | NA     |
| feature:167824992 | hypothetical protein                                               | NA      | NA     |
| feature:167824994 | hypothetical protein                                               | NA      | NA     |
| feature:167824996 | hypothetical protein                                               | NA      | NA     |
| feature:167824998 | hypothetical protein                                               | NA      | NA     |
| feature:167825000 | truncated transposon gamma-delta resolvase                         | NA      | NA     |
| feature:167825002 | hypothetical protein                                               | NA      | NA     |
| feature:167825004 | hypothetical protein                                               | NA      | NA     |
| feature:167825006 | hypothetical protein                                               | NA      | NA     |
| feature:167825008 | hypothetical protein                                               | NA      | NA     |
| feature:167825010 | hypothetical protein                                               | NA      | NA     |
| feature:167825022 | nucleotide-binding protein                                         | COG0424 | [D]    |
| feature:167825028 | hypothetical protein                                               | NA      | NA     |
| feature:167825048 | dihydrolipoamide dehydrogenase                                     | COG0508 | [C]    |
| feature:167825050 | putative biotin-requiring enzyme                                   | COG2609 | [C]    |
| feature:167825062 | hypothetical protein                                               | NA      | NA     |
| feature:167825064 | GTP-binding protein LepA                                           | COG0481 | [M]    |
| feature:167825066 | GTP-binding protein LepA                                           | COG0481 | [M]    |
| feature:167825068 | GTP-binding protein LepA                                           | COG0481 | [M]    |
| feature:167825080 | COG0290: Translation initiation factor IF3                         | NA      | NA     |
| feature:167825084 | threonyl-tRNA synthetase                                           | COG0441 | [J]    |
| feature:167825086 | hypothetical protein                                               | NA      | NA     |
| feature:167825090 | conserved hypothetical protein                                     | COG0451 | [MG]   |
| feature:167825112 | hypothetical protein                                               | NA      | NA     |
| feature:167825114 | 3-phosphoshikimate 1-carboxyvinyltransferase                       | COG0128 | [E]    |
| feature:167825128 | hypothetical protein                                               | NA      | NA     |
| feature:167825134 | acetyl-CoA carboxylase subunit beta                                | COG0777 | [I]    |
| feature:167825144 | RmuC domain protein                                                | COG1322 | [S]    |
| feature:167825150 | hypothetical protein                                               | NA      | NA     |
| feature:167825152 | hypothetical protein                                               | NA      | NA     |
| feature:167825160 | hypothetical protein                                               | NA      | NA     |
| feature:167825220 | muropeptide permease AmpG                                          | COG0477 | [GEPR] |
| feature:167825222 | major facilitator transporter                                      | COG0477 | [GEPR] |
| feature:167825226 | hypothetical protein                                               | NA      | NA     |
| feature:167825228 | hypothetical protein                                               | NA      | NA     |
| feature:167825232 | hypothetical protein                                               | COG0500 | [QR]   |
| feature:167825234 | hypothetical protein OA307_2585                                    | COG4310 | [R]    |
| feature:167825236 | acylphosphatase                                                    | COG1254 | [C]    |
| feature:167825244 | hypothetical protein PU1002_04226                                  | NA      | NA     |
| feature:167825246 | hypothetical protein                                               | NA      | NA     |
| feature:167825248 | hypothetical protein                                               | NA      | NA     |
| feature:167825250 | hypothetical protein RAZWK3B_09726                                 | NA      | NA     |
| feature:167825252 | hypothetical protein                                               | NA      | NA     |
| feature:167825254 | COG0582: Integrase                                                 | COG0582 | [L]    |
| feature:167825256 | hypothetical protein                                               | NA      | NA     |
| feature:167825258 | putative site-specific recombinase, phage integrase family protein | NA      | NA     |
| feature:167825260 | hypothetical protein                                               | NA      | NA     |
| feature:167825262 | DedA family protein                                                | COG1238 | [S]    |
| feature:167825264 | long-chain-fatty-acid--CoA ligase, putative                        | COG1022 | [I]    |
| feature:167825266 | hypothetical protein                                               | NA      | NA     |

|                   |                                                                           |         |     |
|-------------------|---------------------------------------------------------------------------|---------|-----|
| feature:167825268 | hypothetical protein                                                      | NA      | NA  |
| feature:167825270 | hypothetical protein                                                      | NA      | NA  |
| feature:167825272 | hypothetical protein                                                      | NA      | NA  |
| feature:167825274 | hypothetical protein                                                      | NA      | NA  |
| feature:167825276 | hypothetical protein PU1002_04226                                         | COG1329 | [K] |
| feature:167825278 | long-chain-fatty-acid--CoA ligase, putative                               | COG1022 | [I] |
| feature:167825280 | DedA family protein                                                       | COG1238 | [S] |
| feature:167825298 | diaminopimelate decarboxylase                                             | COG0019 | [E] |
| feature:167825322 | hypothetical protein                                                      | NA      | NA  |
| feature:167825350 | ATP synthase F1, delta subunit                                            | COG0712 | [C] |
| feature:167825356 | fructose-6-phosphate aldolase 2                                           | COG0176 | [G] |
| feature:167825360 | dihydrolipoamide dehydrogenase                                            | COG1249 | [C] |
| feature:167825384 | aspartate-semialdehyde dehydrogenase                                      | COG0136 | [E] |
| feature:167825386 | aspartate-semialdehyde dehydrogenase                                      | COG0136 | [E] |
| feature:167825392 | 3-isopropylmalate dehydratase, large subunit                              | COG0065 | [E] |
| feature:167825410 | hypothetical protein                                                      | NA      | NA  |
| feature:167825412 | possible transmembrane protein                                            | NA      | NA  |
| feature:167825422 | hypothetical protein                                                      | NA      | NA  |
| feature:167825434 | (S)-2-hydroxy-acid oxidase                                                | COG0277 | [C] |
| feature:167905352 | conserved hypothetical protein                                            | COG1809 | [S] |
| feature:167905356 | COG2855: Uncharacterized membrane protein                                 | NA      | NA  |
| feature:167905360 | K+-dependent Na+/Ca+ exchanger related-protein                            | COG0530 | [P] |
| feature:167905362 | CaCA family Na(+)/Ca(+) antiporter                                        | COG0530 | [P] |
| feature:167905370 | efflux ABC transporter, permease protein                                  | NA      | NA  |
| feature:167905372 | tricarballoylate dehydrogenase                                            | COG1053 | [C] |
| feature:167905374 | putative succinate dehydrogenase/fumarate reductas e flavoprotein subunit | COG1053 | [C] |
| feature:167905382 | conserved hypothetical protein                                            | NA      | NA  |
| feature:167905392 | 5'-methylthioadenosinenucleosidase/S- adenosylhomoc ysteinenucleosidase   | COG0775 | [F] |
| feature:167905398 | Cytochrome c                                                              | NA      | NA  |
| feature:167905404 | conserved hypothetical protein                                            | NA      | NA  |
| feature:167905406 | NMT1/THI5 like domain protein                                             | NA      | NA  |
| feature:167905408 | ABC transporter related                                                   | COG1116 | [P] |
| feature:167905410 | ABC transporter ATP-binding protein (taurine)                             | COG1116 | [P] |
| feature:167905412 | ABC transporter permease protein                                          | COG0600 | [P] |
| feature:167905416 | Substrate-binding region of ABC-type glycine betai ne transport system    | COG2113 | [E] |
| feature:167905418 | hypothetical protein SAR11_0965                                           | NA      | NA  |
| feature:167905420 | ferric-uptake regulator                                                   | NA      | NA  |
| feature:167905426 | iron(III) ABC transporter                                                 | COG3842 | [E] |
| feature:167905428 | iron(III) ABC transporter                                                 | COG1178 | [P] |
| feature:167905430 | hypothetical protein                                                      | NA      | NA  |
| feature:167905432 | hypothetical protein                                                      | NA      | NA  |
| feature:167905434 | iron-uptake ABC transport system periplasmic iron-binding protein         | COG1840 | [P] |
| feature:167905436 | deoxyribodipyrimidine photolyase-related protein                          | COG3046 | [R] |
| feature:167905438 | deoxyribodipyrimidine photolyase-related protein                          | COG3046 | [R] |
| feature:167905448 | putative cytochrome c                                                     | COG2010 | [C] |
| feature:167905472 | hypothetical protein                                                      | NA      | NA  |
| feature:167905482 | hypothetical protein                                                      | NA      | NA  |
| feature:167905490 | putative D-ala D-ala ligase                                               | COG1181 | [M] |
| feature:167905504 | phosphoglucosmutase/phosphomannosmutase family prote in MrsA              | COG1109 | [G] |



|                   |                                                                      |         |     |
|-------------------|----------------------------------------------------------------------|---------|-----|
| feature:167932898 | hypothetical protein                                                 | NA      | NA  |
| feature:167932910 | GTP cyclohydrolase II /3,4-dihydroxy-2-butanone 4-phosphate synthase | COG0108 | [H] |
| feature:167932922 | delta-aminolevulinic acid dehydratase                                | COG0113 | [H] |
| feature:167932966 | aspartyl/glutamyl-tRNA amidotransferase subunit B                    | COG0064 | [J] |
| feature:167932968 | glutamyl-tRNA(gln) amidotransferase chain B                          | COG0064 | [J] |
| feature:167932980 | dihydroorotase                                                       | COG0044 | [F] |
| feature:167933000 | lipoate-protein ligase B                                             | COG0321 | [H] |
| feature:167933016 | hypothetical protein                                                 | NA      | NA  |
| feature:167933018 | hypothetical protein                                                 | NA      | NA  |
| feature:167933074 | hypothetical protein                                                 | NA      | NA  |
| feature:167933082 | hypothetical protein                                                 | NA      | NA  |
| feature:167933094 | hypothetical protein Bpro_2642                                       | NA      | NA  |
| feature:167933102 | trigger factor                                                       | COG0544 | [O] |
| feature:167933104 | trigger factor                                                       | COG0544 | [O] |
| feature:167933108 | hypothetical protein                                                 | NA      | NA  |
| feature:167933116 | Quaternary ammonium compound-resistance protein qa cH                | COG2076 | [P] |
| feature:167933118 | hypothetical protein                                                 | NA      | NA  |
| feature:167933122 | hypothetical protein                                                 | NA      | NA  |
| feature:167933124 | ABC transporter, nucleotide binding/ATPase protein (zinc)            | COG1121 | [P] |
| feature:167933132 | hypothetical oxidoreductase yiaK                                     | NA      | NA  |
| feature:167933134 | hypothetical protein                                                 | NA      | NA  |
| feature:167933136 | hypothetical protein                                                 | NA      | NA  |
| feature:167933138 | hypothetical protein                                                 | NA      | NA  |
| feature:167933140 | hypothetical protein                                                 | NA      | NA  |
| feature:167933142 | hypothetical protein                                                 | NA      | NA  |
| feature:167933144 | hypothetical protein PB7211_875                                      | NA      | NA  |
| feature:167933146 | hypothetical protein                                                 | NA      | NA  |
| feature:167933148 | hypothetical protein Noc_2239                                        | NA      | NA  |
| feature:167933150 | hypothetical protein                                                 | NA      | NA  |
| feature:167933152 | hypothetical protein                                                 | NA      | NA  |
| feature:167933154 | hypothetical protein                                                 | NA      | NA  |
| feature:167933156 | hypothetical protein                                                 | NA      | NA  |
| feature:167933158 | hypothetical protein                                                 | NA      | NA  |
| feature:167933160 | hypothetical protein S-PM2p152                                       | NA      | NA  |
| feature:167933162 | hypothetical protein Nham_2527                                       | NA      | NA  |
| feature:167933164 | hypothetical protein                                                 | NA      | NA  |
| feature:167933166 | hypothetical protein                                                 | NA      | NA  |
| feature:167933168 | hypothetical protein                                                 | NA      | NA  |
| feature:167933170 | hypothetical protein                                                 | NA      | NA  |
| feature:167933172 | hypothetical protein                                                 | NA      | NA  |
| feature:167933174 | hypothetical protein                                                 | NA      | NA  |
| feature:167933176 | hypothetical protein                                                 | NA      | NA  |
| feature:167933178 | hypothetical protein                                                 | NA      | NA  |
| feature:167933180 | hypothetical protein                                                 | NA      | NA  |
| feature:167933182 | Glycosyl transferase                                                 | COG0463 | [M] |
| feature:167933184 | glycosyl transferase family protein                                  | COG0463 | [M] |
| feature:167933212 | RNA methyltransferase                                                | COG0565 | [J] |
| feature:167933214 | tRNA/rRNA methyltransferase                                          | COG0565 | [J] |
| feature:167933218 | hypothetical protein                                                 | NA      | NA  |
| feature:167933226 | hypothetical protein PU1002_05956                                    | NA      | NA  |
| feature:167933228 | hypothetical protein PU1002_05956                                    | NA      | NA  |

|                   |                                                      |         |        |
|-------------------|------------------------------------------------------|---------|--------|
| feature:167933230 | protein of unknown function DUF218                   | COG1434 | [S]    |
| feature:167933232 | hypothetical protein                                 | NA      | NA     |
| feature:167933236 | hypothetical protein                                 | COG0449 | [M]    |
| feature:167933254 | hypothetical protein HPDFL43_18047                   | NA      | NA     |
| feature:167933256 | COG0412: Dienelactone hydrolase and related enzyme s | NA      | NA     |
| feature:167933264 | phosphomannomutase                                   | COG1109 | [G]    |
| feature:167933266 | hypothetical protein SAR11_0794                      | NA      | NA     |
| feature:167933268 | hypothetical protein SAR11_0793                      | NA      | NA     |
| feature:167933270 | hypothetical protein PU1002_00295                    | NA      | NA     |
| feature:167933272 | conserved hypothetical protein                       | COG2961 | [R]    |
| feature:167933294 | D-lactate dehydrogenase (cytochrome)                 | COG0277 | [C]    |
| feature:167933296 | hypothetical protein                                 | NA      | NA     |
| feature:167933302 | DNA photolyase-like protein                          | COG0415 | [L]    |
| feature:167933304 | hypothetical protein                                 | NA      | NA     |
| feature:167933306 | conserved hypothetical protein                       | NA      | NA     |
| feature:167933308 | COG2849: Uncharacterized BCR                         | COG2849 | [S]    |
| feature:167933310 | hypothetical protein SAR11_0636                      | NA      | NA     |
| feature:167933312 | hypothetical protein                                 | NA      | NA     |
| feature:167933314 | hypothetical protein PU1002_00600                    | NA      | NA     |
| feature:167933316 | hypothetical protein                                 | NA      | NA     |
| feature:167933318 | hypothetical protein                                 | NA      | NA     |
| feature:167933320 | hypothetical protein                                 | NA      | NA     |
| feature:167933322 | hypothetical protein BACINT_04027                    | COG0317 | [TK]   |
| feature:167933324 | transporter                                          | COG0477 | [GEPR] |
| feature:167933326 | hypothetical protein                                 | NA      | NA     |
| feature:167933328 | hypothetical protein                                 | NA      | NA     |
| feature:167933330 | hypothetical protein                                 | NA      | NA     |
| feature:167933332 | hypothetical protein                                 | NA      | NA     |
| feature:167935902 | Glycosyl transferase group 1                         | NA      | NA     |
| feature:167935904 | Glycosyl transferase group 1                         | COG0438 | [M]    |
| feature:167935912 | extracellular solute-binding protein                 | COG0725 | [P]    |
| feature:167935924 | pantetheine-phosphate adenyltransferase              | COG0669 | [H]    |

**Genes specific to IMCC9063**

| <b>Gene ID</b> | <b>Annotation</b>                                    | <b>COG</b> | <b>COG Category</b> |
|----------------|------------------------------------------------------|------------|---------------------|
| SAR11G3_00011  | hypothetical protein                                 | NA         | NA                  |
| SAR11G3_00012  | hypothetical protein                                 | NA         | NA                  |
| SAR11G3_00030  | putative flippase                                    | NA         | NA                  |
| SAR11G3_00031  | glycosyl transferase, family 2                       | NA         | NA                  |
| SAR11G3_00032  | hypothetical protein                                 | NA         | NA                  |
| SAR11G3_00033  | hypothetical protein                                 | NA         | NA                  |
| SAR11G3_00034  | putative glycosyltransferase                         | COG0463    | [M]                 |
| SAR11G3_00035  | hypothetical protein                                 | NA         | NA                  |
| SAR11G3_00036  | hypothetical protein                                 | NA         | NA                  |
| SAR11G3_00037  | hypothetical protein                                 | NA         | NA                  |
| SAR11G3_00038  | hypothetical protein                                 | NA         | NA                  |
| SAR11G3_00041  | hypothetical protein                                 | NA         | NA                  |
| SAR11G3_00042  | hypothetical protein                                 | NA         | NA                  |
| SAR11G3_00043  | glycosyltransferase involved in cell wall biogenesis | COG0463    | [M]                 |
| SAR11G3_00044  | nucleotidyl transferase superfamily                  | NA         | NA                  |
| SAR11G3_00045  | capsular polysaccharide biosynthesis protein CapD    | COG1086    | [MG]                |
| SAR11G3_00046  | hypothetical protein                                 | NA         | NA                  |
| SAR11G3_00047  | hypothetical protein                                 | NA         | NA                  |

|               |                                                                               |         |      |
|---------------|-------------------------------------------------------------------------------|---------|------|
| SAR11G3_00048 | hypothetical protein                                                          | NA      | NA   |
| SAR11G3_00049 | wbpG                                                                          | COG0037 | [D]  |
| SAR11G3_00050 | putative LPS biosynthesis protein WbpG                                        | COG0037 | [D]  |
| SAR11G3_00051 | hypothetical protein                                                          | NA      | NA   |
| SAR11G3_00054 | hypothetical protein                                                          | COG0118 | [E]  |
| SAR11G3_00055 | hypothetical protein                                                          | COG1207 | [M]  |
| SAR11G3_00056 | WblQ protein                                                                  | COG0399 | [M]  |
| SAR11G3_00057 | oxidoreductase, Gfo/Idh/MocA family/transferase<br>hexapeptide repeat protein | NA      | NA   |
| SAR11G3_00058 | hypothetical protein                                                          | NA      | NA   |
| SAR11G3_00059 | glycosyltransferase ycbB                                                      | COG0463 | [M]  |
| SAR11G3_00060 | hypothetical protein                                                          | NA      | NA   |
| SAR11G3_00061 | hypothetical protein                                                          | NA      | NA   |
| SAR11G3_00064 | hypothetical protein                                                          | COG0438 | [M]  |
| SAR11G3_00065 | hypothetical protein                                                          | NA      | NA   |
| SAR11G3_00066 | hypothetical protein                                                          | NA      | NA   |
| SAR11G3_00067 | hypothetical protein                                                          | NA      | NA   |
| SAR11G3_00068 | hypothetical protein                                                          | NA      | NA   |
| SAR11G3_00069 | lipoprotein                                                                   | NA      | NA   |
| SAR11G3_00071 | cps9E, putative                                                               | COG1086 | [MG] |
| SAR11G3_00072 | nucleotide-diphosphate-sugar epimerase, membrane<br>associated                | COG1086 | [MG] |
| SAR11G3_00073 | glycosyltransferase                                                           | COG0438 | [M]  |
| SAR11G3_00074 | hypothetical protein                                                          | COG1670 | [J]  |
| SAR11G3_00075 | hypothetical protein                                                          | NA      | NA   |
| SAR11G3_00076 | hypothetical protein                                                          | NA      | NA   |
| SAR11G3_00077 | ubiquinone/menaquinone biosynthesis methyltransferase<br>UBIE                 | NA      | NA   |
| SAR11G3_00078 | protein containing aminopeptidase domain                                      | COG4310 | [R]  |
| SAR11G3_00079 | UDP-glucose 4-epimerase                                                       | COG0451 | [MG] |
| SAR11G3_00080 | hypothetical protein                                                          | NA      | NA   |
| SAR11G3_00083 | hypothetical protein                                                          | NA      | NA   |
| SAR11G3_00084 | 3-deoxy-manno-octulosonate cytidyltransferase                                 | COG1212 | [M]  |
| SAR11G3_00085 | 4-hydroxy-2-oxovalerate aldolase                                              | COG0119 | [E]  |
| SAR11G3_00086 | 4-hydroxy-2-oxovalerate aldolase                                              | NA      | NA   |
| SAR11G3_00087 | hypothetical protein                                                          | NA      | NA   |
| SAR11G3_00088 | hypothetical protein                                                          | NA      | NA   |
| SAR11G3_00089 | spore coat polysaccharide biosynthesis protein spsC                           | NA      | NA   |
| SAR11G3_00090 | hypothetical protein                                                          | NA      | NA   |
| SAR11G3_00091 | spore coat polysaccharide biosynthesis protein spsC                           | COG0399 | [M]  |
| SAR11G3_00092 | putative dehydrogenase and related protein                                    | NA      | NA   |
| SAR11G3_00093 | hypothetical protein                                                          | NA      | NA   |
| SAR11G3_00094 | hypothetical protein                                                          | NA      | NA   |
| SAR11G3_00095 | hypothetical protein                                                          | NA      | NA   |
| SAR11G3_00097 | LPS biosynthesis protein                                                      | COG0037 | [D]  |
| SAR11G3_00098 | hypothetical protein                                                          | NA      | NA   |
| SAR11G3_00099 | glycosyltransferase                                                           | COG0463 | [M]  |
| SAR11G3_00100 | N-acetylneuraminate synthase                                                  | COG2089 | [M]  |
| SAR11G3_00101 | N-acetylneuraminate synthase                                                  | COG2089 | [M]  |
| SAR11G3_00102 | UDP-N-acetylglucosamine 4,6-dehydratase                                       | COG1083 | [M]  |
| SAR11G3_00103 | UDP-N-acetylglucosamine 4,6-dehydratase                                       | COG1086 | [MG] |
| SAR11G3_00104 | hypothetical protein                                                          | NA      | NA   |
| SAR11G3_00105 | hypothetical protein                                                          | NA      | NA   |
| SAR11G3_00107 | acylneuraminate cytidyltransferase                                            | NA      | NA   |

|               |                                                                                 |         |       |
|---------------|---------------------------------------------------------------------------------|---------|-------|
| SAR11G3_00108 | ptmF                                                                            | NA      | NA    |
| SAR11G3_00111 | hypothetical protein                                                            | NA      | NA    |
| SAR11G3_00112 | legionaminic acid biosynthesis protein PtmG                                     | COG0037 | [D]   |
| SAR11G3_00114 | D-glycero-D-manno-heptose 1-phosphate<br>guanosyltransferase                    | NA      | NA    |
| SAR11G3_00115 | hypothetical protein                                                            | COG2120 | [S]   |
| SAR11G3_00116 | formyltransferase, putative                                                     | NA      | NA    |
| SAR11G3_00117 | UDP-N-acetylglucosamine 2-epimerase                                             | COG0381 | [M]   |
| SAR11G3_00118 | N-acetylneuraminate synthase                                                    | COG2089 | [M]   |
| SAR11G3_00119 | hypothetical protein                                                            | COG0110 | [R]   |
| SAR11G3_00120 | putative aminotransferase, DegT family                                          | COG0399 | [M]   |
| SAR11G3_00123 | hypothetical protein                                                            | NA      | NA    |
| SAR11G3_00124 | phosphoenolpyruvate synthase / Pyruvate phosphate<br>dikinase                   | COG0574 | [G]   |
| SAR11G3_00125 | phosphoenolpyruvate synthase / Pyruvate phosphate<br>dikinase                   | COG0574 | [G]   |
| SAR11G3_00126 | glutamine amidotransferase class-I                                              | COG2071 | [R]   |
| SAR11G3_00127 | sugar metabolism cluster protein                                                | COG1213 | [M]   |
| SAR11G3_00128 | adenylylsulfate kinase                                                          | COG0529 | [P]   |
| SAR11G3_00129 | hypothetical protein                                                            | NA      | NA    |
| SAR11G3_00130 | hypothetical protein                                                            | NA      | NA    |
| SAR11G3_00131 | hypothetical protein                                                            | NA      | NA    |
| SAR11G3_00132 | hypothetical protein                                                            | NA      | NA    |
| SAR11G3_00133 | hypothetical protein                                                            | NA      | NA    |
| SAR11G3_00134 | hypothetical protein                                                            | NA      | NA    |
| SAR11G3_00135 | hypothetical protein                                                            | NA      | NA    |
| SAR11G3_00136 | hypothetical protein                                                            | NA      | NA    |
| SAR11G3_00137 | hypothetical protein                                                            | NA      | NA    |
| SAR11G3_00138 | hypothetical protein                                                            | COG0500 | [QR]  |
| SAR11G3_00154 | hypothetical protein                                                            | NA      | NA    |
| SAR11G3_00164 | hypothetical protein                                                            | NA      | NA    |
| SAR11G3_00169 | hypothetical protein                                                            | NA      | NA    |
| SAR11G3_00173 | D-amino acid dehydrogenase small subunit                                        | COG0665 | [E]   |
| SAR11G3_00174 | permease of the drug/metabolite transporter (DMT)<br>superfamily                | COG0697 | [GER] |
| SAR11G3_00178 | aldehyde dehydrogenase                                                          | NA      | NA    |
| SAR11G3_00189 | ferric iron ABC transporter, permease protein                                   | COG1178 | [P]   |
| SAR11G3_00190 | ferric iron ABC transporter, iron-binding protein                               | COG1840 | [P]   |
| SAR11G3_00191 | hypothetical protein                                                            | NA      | NA    |
| SAR11G3_00192 | metal-dependent hydrolases of the beta-lactamase<br>superfamily I; PhnP protein | COG1235 | [R]   |
| SAR11G3_00204 | hypothetical protein                                                            | NA      | NA    |
| SAR11G3_00205 | VcbS                                                                            | NA      | NA    |
| SAR11G3_00206 | outer membrane autotransporter                                                  | NA      | NA    |
| SAR11G3_00207 | hypothetical protein                                                            | NA      | NA    |
| SAR11G3_00209 | putative secretory autotransporter                                              | NA      | NA    |
| SAR11G3_00210 | putative secretory autotransporter                                              | NA      | NA    |
| SAR11G3_00212 | hypothetical protein                                                            | NA      | NA    |
| SAR11G3_00213 | hypothetical protein                                                            | NA      | NA    |
| SAR11G3_00214 | putative pseudo-pilin PulG                                                      | NA      | NA    |
| SAR11G3_00215 | fimbrial protein pilin                                                          | NA      | NA    |
| SAR11G3_00216 | sulfate transporter/antisigma-factor antagonist STAS                            | COG1366 | [T]   |
| SAR11G3_00219 | type II Secretion System PilC                                                   | NA      | NA    |
| SAR11G3_00222 | type 4 fimbrial biogenesis protein PilP                                         | NA      | NA    |

|               |                                           |         |      |
|---------------|-------------------------------------------|---------|------|
| SAR11G3_00223 | hypothetical protein                      | NA      | NA   |
| SAR11G3_00227 | hypothetical protein                      | NA      | NA   |
| SAR11G3_00230 | type IV fimbrial biogenesis protein PilY1 | COG3419 | [NU] |
| SAR11G3_00231 | hypothetical protein                      | NA      | NA   |
| SAR11G3_00232 | type IV pilus assembly protein PilW       | NA      | NA   |
| SAR11G3_00233 | type IV pilus assembly protein PilW       | NA      | NA   |
| SAR11G3_00234 | putative pilV-like pilin protein          | NA      | NA   |
| SAR11G3_00235 | putative pilV-like pilin protein          | NA      | NA   |
| SAR11G3_00236 | putative pilin protein PilU               | NA      | NA   |
| SAR11G3_00238 | outer membrane autotransporter            | NA      | NA   |
| SAR11G3_00239 | hypothetical protein                      | NA      | NA   |
| SAR11G3_00240 | hypothetical protein                      | NA      | NA   |
| SAR11G3_00244 | transcriptional regulator, GntR family    | COG1802 | [K]  |
| SAR11G3_00266 | hypothetical protein                      | NA      | NA   |
| SAR11G3_00277 | putative manganese transporter, 11 TMS    | NA      | NA   |
| SAR11G3_00305 | hypothetical protein                      | NA      | NA   |
| SAR11G3_00323 | hypothetical protein                      | NA      | NA   |
| SAR11G3_00348 | hypothetical protein                      | NA      | NA   |
| SAR11G3_00352 | hypothetical protein                      | NA      | NA   |
| SAR11G3_00354 | hypothetical protein                      | NA      | NA   |
| SAR11G3_00372 | uroporphyrinogen-III synthase             | NA      | NA   |
| SAR11G3_00378 | hypothetical protein                      | NA      | NA   |
| SAR11G3_00382 | YGGT family                               | NA      | NA   |
| SAR11G3_00389 | UPF0434 protein YcaR                      | COG2835 | [S]  |
| SAR11G3_00393 | uroporphyrinogen decarboxylase            | COG0407 | [H]  |
| SAR11G3_00414 | hypothetical protein                      | NA      | NA   |
| SAR11G3_00428 | hypothetical protein                      | NA      | NA   |
| SAR11G3_00431 | thiaminase II                             | COG0819 | [K]  |
| SAR11G3_00437 | hypothetical protein                      | COG4338 | [S]  |
| SAR11G3_00458 | putative transmembrane protein            | NA      | NA   |
| SAR11G3_00464 | hypothetical protein                      | NA      | NA   |
| SAR11G3_00506 | hypothetical protein                      | NA      | NA   |
| SAR11G3_00510 | hypothetical protein                      | NA      | NA   |
| SAR11G3_00518 | hypothetical protein                      | NA      | NA   |
| SAR11G3_00521 | hypothetical protein                      | NA      | NA   |
| SAR11G3_00526 | multi-domain protein                      | COG1254 | [C]  |
| SAR11G3_00528 | hypothetical protein                      | NA      | NA   |
| SAR11G3_00547 | hypothetical protein                      | NA      | NA   |
| SAR11G3_00561 | hypothetical protein                      | NA      | NA   |
| SAR11G3_00563 | hypothetical protein                      | NA      | NA   |
| SAR11G3_00567 | hypothetical protein                      | NA      | NA   |
| SAR11G3_00571 | hypothetical protein                      | NA      | NA   |
| SAR11G3_00572 | hypothetical protein                      | NA      | NA   |
| SAR11G3_00573 | hypothetical protein                      | NA      | NA   |
| SAR11G3_00579 | hypothetical protein                      | NA      | NA   |
| SAR11G3_00580 | hypothetical protein                      | NA      | NA   |
| SAR11G3_00581 | glycosyl transferase, family 2            | COG0463 | [M]  |
| SAR11G3_00582 | hypothetical protein                      | NA      | NA   |
| SAR11G3_00594 | hypothetical protein                      | NA      | NA   |
| SAR11G3_00596 | hypothetical protein                      | NA      | NA   |
| SAR11G3_00604 | nucleoside-diphosphate-sugar epimerase    | COG0451 | [MG] |
| SAR11G3_00614 | hypothetical protein                      | NA      | NA   |
| SAR11G3_00615 | hypothetical protein                      | NA      | NA   |

|               |                                                                                             |         |       |
|---------------|---------------------------------------------------------------------------------------------|---------|-------|
| SAR11G3_00616 | hypothetical protein                                                                        | COG0451 | [MG]  |
| SAR11G3_00620 | hypothetical protein                                                                        | NA      | NA    |
| SAR11G3_00628 | hypothetical protein                                                                        | NA      | NA    |
| SAR11G3_00634 | septum formation protein Maf                                                                | COG0424 | [D]   |
| SAR11G3_00641 | hypothetical protein                                                                        | COG3788 | [R]   |
| SAR11G3_00672 | hypothetical protein                                                                        | NA      | NA    |
| SAR11G3_00673 | putative subunit of Alternative cytochrome c oxidase                                        | COG5605 | [S]   |
| SAR11G3_00674 | alternative cytochrome c oxidase polypeptide CoxP                                           | COG1845 | [C]   |
| SAR11G3_00675 | alternative cytochrome c oxidase polypeptide CoxN                                           | COG1845 | [C]   |
| SAR11G3_00678 | hypothetical protein                                                                        | NA      | NA    |
| SAR11G3_00680 | hypothetical protein                                                                        | NA      | NA    |
| SAR11G3_00683 | cytochrome oxidase biogenesis protein Surf1, facilitates heme A insertion                   | COG3346 | [S]   |
| SAR11G3_00690 | phytoene synthase                                                                           | NA      | NA    |
| SAR11G3_00691 | phytoene synthase                                                                           | NA      | NA    |
| SAR11G3_00701 | hypothetical protein                                                                        | NA      | NA    |
| SAR11G3_00751 | hypothetical protein                                                                        | NA      | NA    |
| SAR11G3_00769 | hypothetical protein                                                                        | NA      | NA    |
| SAR11G3_00772 | hypothetical protein                                                                        | NA      | NA    |
| SAR11G3_00771 | hypothetical protein                                                                        | NA      | NA    |
| SAR11G3_00777 | hypothetical protein                                                                        | NA      | NA    |
| SAR11G3_00779 | hypothetical protein                                                                        | COG0620 | [E]   |
| SAR11G3_00780 | putative transporter component                                                              | NA      | NA    |
| SAR11G3_00784 | alkyl hydroperoxide reductase subunit C-like protein                                        | COG0450 | [O]   |
| SAR11G3_00787 | hypothetical protein                                                                        | NA      | NA    |
| SAR11G3_00802 | hypothetical protein                                                                        | NA      | NA    |
| SAR11G3_00805 | hypothetical protein                                                                        | NA      | NA    |
| SAR11G3_00810 | hypothetical protein                                                                        | NA      | NA    |
| SAR11G3_00828 | putative integral membrane protein                                                          | COG0730 | [R]   |
| SAR11G3_00832 | hypothetical protein                                                                        | NA      | NA    |
| SAR11G3_00841 | nitrogen regulatory protein P-II                                                            | COG0347 | [E]   |
| SAR11G3_00852 | hypothetical protein                                                                        | COG3564 | [S]   |
| SAR11G3_00856 | hypothetical protein                                                                        | NA      | NA    |
| SAR11G3_00860 | hypothetical protein                                                                        | NA      | NA    |
| SAR11G3_00861 | hypothetical protein                                                                        | NA      | NA    |
| SAR11G3_00863 | cold-shock DEAD-box protein A                                                               | COG0513 | [LKJ] |
| SAR11G3_00864 | snoK-like protein                                                                           | NA      | NA    |
| SAR11G3_00865 | hypothetical protein                                                                        | COG0500 | [QR]  |
| SAR11G3_00866 | hypothetical protein                                                                        | COG4301 | [S]   |
| SAR11G3_00867 | glutaredoxin-like protein NrdH, required for reduction of Ribonucleotide reductase class Ib | NA      | NA    |
| SAR11G3_00870 | hypothetical protein                                                                        | NA      | NA    |
| SAR11G3_00872 | tiTiN family                                                                                | NA      | NA    |
| SAR11G3_00874 | hypothetical protein                                                                        | NA      | NA    |
| SAR11G3_00885 | hypothetical protein                                                                        | NA      | NA    |
| SAR11G3_00887 | hypothetical protein                                                                        | NA      | NA    |
| SAR11G3_00891 | hypothetical protein                                                                        | NA      | NA    |
| SAR11G3_00890 | hypothetical protein                                                                        | COG1238 | [S]   |
| SAR11G3_00907 | ADP-heptose:LPS heptosyltransferase                                                         | COG0859 | [M]   |
| SAR11G3_00913 | hypothetical protein                                                                        | NA      | NA    |
| SAR11G3_00914 | hypothetical protein                                                                        | NA      | NA    |
| SAR11G3_00917 | hypothetical protein                                                                        | NA      | NA    |
| SAR11G3_00918 | hypothetical protein                                                                        | NA      | NA    |
| SAR11G3_00957 | hypothetical protein                                                                        | COG2104 | [H]   |

|               |                                                          |         |      |
|---------------|----------------------------------------------------------|---------|------|
| SAR11G3_00959 | hypothetical protein                                     | NA      | NA   |
| SAR11G3_00961 | DNA repair and recombination protein, putative helicase  | COG0507 | [L]  |
| SAR11G3_00962 | hypothetical protein                                     | NA      | NA   |
| SAR11G3_00963 | hypothetical protein                                     | NA      | NA   |
| SAR11G3_00964 | hypothetical protein                                     | NA      | NA   |
| SAR11G3_00965 | guanosine-3',5'-bis(Diphosphate) 3'-pyrophosphohydrolase | COG0317 | [TK] |
| SAR11G3_00966 | hypothetical protein                                     | NA      | NA   |
| SAR11G3_00967 | hypothetical protein                                     | NA      | NA   |
| SAR11G3_00968 | hypothetical protein                                     | NA      | NA   |
| SAR11G3_00969 | hypothetical protein                                     | NA      | NA   |
| SAR11G3_00970 | hypothetical protein                                     | NA      | NA   |
| SAR11G3_00971 | hypothetical protein                                     | NA      | NA   |
| SAR11G3_00972 | hypothetical protein                                     | NA      | NA   |
| SAR11G3_00974 | alternative oxidase                                      | NA      | NA   |
| SAR11G3_00975 | hypothetical protein                                     | NA      | NA   |
| SAR11G3_00976 | hypothetical protein                                     | NA      | NA   |
| SAR11G3_00978 | hypothetical protein                                     | NA      | NA   |
| SAR11G3_00979 | hypothetical protein                                     | NA      | NA   |
| SAR11G3_00980 | hypothetical protein                                     | NA      | NA   |
| SAR11G3_00981 | hypothetical protein                                     | NA      | NA   |
| SAR11G3_00982 | hypothetical protein                                     | COG4889 | [R]  |
| SAR11G3_00983 | hypothetical protein                                     | NA      | NA   |
| SAR11G3_00984 | hypothetical protein                                     | NA      | NA   |
| SAR11G3_00985 | hypothetical protein                                     | NA      | NA   |
| SAR11G3_00998 | hypothetical protein                                     | NA      | NA   |
| SAR11G3_01004 | hypothetical protein                                     | NA      | NA   |
| SAR11G3_01022 | hypothetical protein                                     | NA      | NA   |
| SAR11G3_01027 | hypothetical protein                                     | NA      | NA   |
| SAR11G3_01028 | hypothetical protein                                     | NA      | NA   |
| SAR11G3_01037 | hypothetical protein                                     | NA      | NA   |
| SAR11G3_01040 | hypothetical protein                                     | NA      | NA   |
| SAR11G3_01044 | hypothetical protein                                     | NA      | NA   |
| SAR11G3_01057 | hypothetical protein                                     | NA      | NA   |
| SAR11G3_01074 | hypothetical protein                                     | NA      | NA   |
| SAR11G3_01088 | protein-L-isoaspartate(D-aspartate) O-methyltransferase  | COG2518 | [O]  |
| SAR11G3_01105 | hypothetical protein                                     | NA      | NA   |
| SAR11G3_01106 | hypothetical protein                                     | NA      | NA   |
| SAR11G3_01107 | hypothetical protein                                     | NA      | NA   |
| SAR11G3_01128 | hypothetical protein                                     | NA      | NA   |
| SAR11G3_01138 | hypothetical protein                                     | NA      | NA   |
| SAR11G3_01141 | extracellular solute-binding protein, family 1           | COG0725 | [P]  |
| SAR11G3_01161 | hypothetical protein                                     | NA      | NA   |
| SAR11G3_01160 | porphobilinogen synthase                                 | COG0113 | [H]  |
| SAR11G3_01231 | hypothetical protein                                     | NA      | NA   |
| SAR11G3_01247 | hypothetical protein                                     | NA      | NA   |
| SAR11G3_01250 | quaternary ammonium compound-resistance protein qacH     | COG2076 | [P]  |
| SAR11G3_01251 | hypothetical protein                                     | NA      | NA   |
| SAR11G3_01252 | hypothetical protein                                     | NA      | NA   |
| SAR11G3_01264 | tRNA/rRNA methyltransferase                              | COG0565 | [J]  |
| SAR11G3_01265 | tRNA:Cm32/Um32 methyltransferase                         | COG0565 | [J]  |
| SAR11G3_01270 | hypothetical protein                                     | NA      | NA   |
| SAR11G3_01271 | protein of unknown function DUF218                       | NA      | NA   |
| SAR11G3_01274 | N-acetylglucosamine-1-phosphate uridyltransferase /      | COG1207 | [M]  |

|               |                                                                                      |         |     |
|---------------|--------------------------------------------------------------------------------------|---------|-----|
|               | Glucosamine-1-phosphate N-acetyltransferase                                          |         |     |
| SAR11G3_01279 | hypothetical protein                                                                 | NA      | NA  |
| SAR11G3_01282 | hypothetical protein                                                                 | COG0412 | [Q] |
| SAR11G3_01288 | hypothetical protein                                                                 | NA      | NA  |
| SAR11G3_01289 | protein involved in catabolism of external DNA                                       | COG2961 | [R] |
| SAR11G3_01291 | dolichol-phosphate mannosyltransferase                                               | NA      | NA  |
| SAR11G3_01292 | hypothetical protein                                                                 | NA      | NA  |
| SAR11G3_01302 | hypothetical protein                                                                 | NA      | NA  |
| SAR11G3_01304 | deoxyribodipyrimidine photolyase                                                     | COG0415 | [L] |
| SAR11G3_01305 | hypothetical protein                                                                 | NA      | NA  |
| SAR11G3_01306 | hypothetical protein                                                                 | NA      | NA  |
| SAR11G3_01307 | sulfate permease                                                                     | COG0659 | [P] |
| SAR11G3_01308 | copper-binding protein                                                               | COG4454 | [P] |
| SAR11G3_01309 | copper-binding protein                                                               | COG4454 | [P] |
| SAR11G3_01310 | hypothetical protein                                                                 | NA      | NA  |
| SAR11G3_01315 | 4-carboxymuconolactone decarboxylase                                                 | COG0599 | [S] |
| SAR11G3_01336 | HI0933 family protein                                                                | COG2081 | [R] |
| SAR11G3_01341 | K <sup>+</sup> -dependent Na <sup>+</sup> /Ca <sup>+</sup> exchanger related-protein | COG0530 | [P] |
| SAR11G3_01342 | hypothetical protein                                                                 | NA      | NA  |
| SAR11G3_01347 | hypothetical protein                                                                 | NA      | NA  |
| SAR11G3_01352 | hypothetical protein                                                                 | NA      | NA  |
| SAR11G3_01357 | 5'-methylthioadenosine nucleosidase / S-adenosylhomocysteine nucleosidase            | COG0775 | [F] |
| SAR11G3_01360 | cytochrome c                                                                         | COG2010 | [C] |
| SAR11G3_01364 | substrate-binding region of ABC-type glycine betaine transport system                | COG2113 | [E] |
| SAR11G3_01365 | hypothetical protein                                                                 | NA      | NA  |
| SAR11G3_01373 | ferric iron ABC transporter, permease protein                                        | COG1178 | [P] |
| SAR11G3_01374 | hypothetical protein                                                                 | NA      | NA  |
| SAR11G3_01375 | hypothetical protein                                                                 | NA      | NA  |
| SAR11G3_01376 | ferric iron ABC transporter, iron-binding protein                                    | COG1840 | [P] |
| SAR11G3_01380 | hypothetical protein                                                                 | NA      | NA  |
| SAR11G3_01383 | putative cytochrome c protein                                                        | COG2010 | [C] |
| SAR11G3_01396 | hypothetical protein                                                                 | NA      | NA  |
| SAR11G3_01397 | hypothetical protein                                                                 | NA      | NA  |
| SAR11G3_01399 | membrane associated lipoprotein precursor                                            | NA      | NA  |
| SAR11G3_01400 | hypothetical protein                                                                 | NA      | NA  |
| SAR11G3_01401 | hypothetical protein                                                                 | NA      | NA  |
| SAR11G3_01408 | D-alanine--D-alanine ligase                                                          | COG1181 | [M] |

#### Paralogous genes in ACE\_P1a.1

| Gene ID           | Annotation                                                                                                                                            | COG     | COG Category |
|-------------------|-------------------------------------------------------------------------------------------------------------------------------------------------------|---------|--------------|
| feature:167713900 | putative bifunctional UDP-N-acetylmuramoylalanyl-D - glutamate--2,6-diaminopimelate ligase/UDP-N-acetylmuramoyl- tripeptide:D-alanyl-D-alanine ligase | NA      | NA           |
| feature:167713946 | hypothetical protein PU1002_06296                                                                                                                     | COG4696 | [S]          |
| feature:167713968 | FAD-dependent thymidylate synthase                                                                                                                    | COG1351 | [F]          |
| feature:167714018 | glutaredoxin                                                                                                                                          | COG0695 | [O]          |
| feature:167714028 | phosphoglycerate dehydrogenase                                                                                                                        | COG1052 | [CHR]        |
| feature:167714030 | SelR domain-containing protein                                                                                                                        | COG0229 | [O]          |
| feature:167714038 | hypothetical protein PU1002_06416                                                                                                                     | NA      | NA           |
| feature:167714040 | LysE type translocator                                                                                                                                | NA      | NA           |
| feature:167714042 | Leu/Ile/Val-binding protein precursor                                                                                                                 | COG0683 | [E]          |



|                   |                                                                             |         |       |
|-------------------|-----------------------------------------------------------------------------|---------|-------|
| feature:167714044 | ABC-type branched-chain amino acid transport system permease protein I      | COG0559 | [E]   |
| feature:167714046 | high-affinity branched-chain amino acid transport permease protein          | COG4177 | [E]   |
| feature:167714048 | ATP-binding protein of ABC transporter NatA                                 | COG0411 | [E]   |
| feature:167714050 | branched-chain amino acid ABC transporter, ATP-binding protein              | COG0410 | [E]   |
| feature:167714056 | hypothetical protein SAR11_1354                                             | NA      | NA    |
| feature:167714070 | hypothetical protein SAR11_1356                                             | NA      | NA    |
| feature:167714072 | hypothetical protein PU1002_06456                                           | NA      | NA    |
| feature:167714104 | luciferase-like monooxygenase                                               | NA      | NA    |
| feature:167714114 | spermidine/putrescine-binding periplasmic protein                           | COG0687 | [E]   |
| feature:167714116 | spermidine/putrescine transport system permease protein potb                | COG1176 | [E]   |
| feature:167714118 | spermidine/putrescine transport system permease protein potc                | COG1177 | [E]   |
| feature:167714120 | 3-hydroxyacyl-CoA dehydrogenase                                             | COG1250 | [I]   |
| feature:167714122 | peptidylprolyl cis-trans isomerase precursor                                | COG0652 | [O]   |
| feature:167714124 | conserved hypothetical protein                                              | NA      | NA    |
| feature:167714130 | Permease for cytosine/purines, uracil, thiamine, allantoin                  | COG1953 | [FH]  |
| feature:167714132 | Xanthine/uracil/vitamin C permease family protein                           | COG2252 | [R]   |
| feature:167714168 | aconitate hydratase                                                         | COG1048 | [C]   |
| feature:167714200 | glutamate synthase large subunit-like protein                               | COG0069 | [E]   |
| feature:167714202 | GXGXG motif-containing protein                                              | COG0070 | [E]   |
| feature:167714206 | GlnT-like protein                                                           | COG0174 | [E]   |
| feature:167714208 | glutamine synthetase catalytic domain                                       | COG0174 | [E]   |
| feature:167717506 | DNA-directed DNA polymerase gamma/tau subunit                               | COG2812 | [L]   |
| feature:167717562 | DNA recombination protein                                                   | NA      | NA    |
| feature:167717618 | hypothetical protein SAR11_0470                                             | NA      | NA    |
| feature:167717670 | putative inner membrane protein translocase component YidC                  | COG0706 | [U]   |
| feature:167717674 | DNA topoisomerase (ATP-hydrolyzing) chain B (DNA gyrase B)                  | COG0187 | [L]   |
| feature:167717678 | phenylalanine-tRNA ligase                                                   | COG0072 | [J]   |
| feature:167717710 | pyruvate dehydrogenase (lipoamide) e1 component                             | COG2609 | [C]   |
| feature:167717718 | ATP-dependent helicase                                                      | COG0513 | [LKJ] |
| feature:167717728 | Putative long-chain-fatty-acid--CoA ligase (Long-chain acyl-CoA synthetase) | NA      | NA    |
| feature:167717792 | protein translation initiation factor 2                                     | COG0532 | [J]   |
| feature:167717828 | possible methylase or methyltransferase                                     | NA      | NA    |
| feature:167717844 | dihydrodipicolinate reductase                                               | COG0289 | [E]   |
| feature:167717868 | DNA-directed DNA polymerase III                                             | NA      | NA    |
| feature:167717880 | tRNA modification GTPase                                                    | COG0486 | [R]   |
| feature:167717882 | sulfotransferase domain-containing protein                                  | NA      | NA    |
| feature:167717884 | putative Sulfotransferase domain protein                                    | NA      | NA    |
| feature:167717886 | transcription termination factor Rho                                        | COG1158 | [K]   |
| feature:167717896 | hypothetical protein SAR11_0343                                             | COG1806 | [S]   |
| feature:167717900 | Maf-like protein                                                            | COG0424 | [D]   |
| feature:167719306 | isoleucyl-tRNA synthetase                                                   | COG0060 | [J]   |
| feature:167719324 | 3-deoxy-D-manno-octulosonic-acid transferase                                | COG1519 | [M]   |
| feature:167719348 | cytochrome c oxidase polypeptide II (cytochrome aa 3 subunit 2)             | COG1622 | [C]   |
| feature:167719364 | cytochrome C oxidase                                                        | COG1622 | [C]   |
| feature:167719366 | cytochrome C oxidase                                                        | COG0843 | [C]   |

|                   |                                                             |         |       |
|-------------------|-------------------------------------------------------------|---------|-------|
| feature:167719368 | cytochrome c oxidase subunit III                            | COG1845 | [C]   |
| feature:167719376 | hypothetical protein SAR11_0901                             | NA      | NA    |
| feature:167719378 | threonine synthase                                          | COG0498 | [E]   |
| feature:167719470 | excinuclease ABC subunit B                                  | COG0556 | [L]   |
| feature:167719476 | thioredoxin reductase                                       | COG0492 | [O]   |
| feature:167719494 | Carbamoyl-phosphate synthase small chain                    | COG0505 | [EF]  |
| feature:167719496 | YqeY-like protein                                           | COG1610 | [S]   |
| feature:167719498 | DNA primase                                                 | NA      | NA    |
| feature:167719500 | RNA polymerase sigma factor                                 | COG0568 | [K]   |
| feature:167719502 | carbamoylphosphate synthase small subunit                   | COG0505 | [EF]  |
| feature:167719692 | putative dehydrogenase                                      | NA      | NA    |
| feature:167719710 | hypothetical protein ALOHA_HF4000141F21ctg1g27              | NA      | NA    |
| feature:167719716 | NADPH:quinone reductase                                     | COG0604 | [CR]  |
| feature:167719740 | Dihydrodipicolinate synthetase                              | COG0329 | [EM]  |
| feature:167719750 | acetylornithine deacetylase                                 | COG0624 | [E]   |
| feature:167719760 | aminomethyl transferase family protein                      | NA      | NA    |
| feature:167719790 | 2-isopropylmalate synthase                                  | COG0119 | [E]   |
| feature:167719832 | ribosomal protein L1                                        | COG0081 | [J]   |
| feature:167719840 | DNA-directed RNA polymerase                                 | COG0085 | [K]   |
| feature:167719914 | probable UTP-glucose-1-phosphate uridylyltransferase        | COG1210 | [M]   |
| feature:167719926 | DNA topoisomerase I                                         | COG0550 | [L]   |
| feature:167719928 | hypothetical protein SAR11_1082                             | NA      | NA    |
| feature:167719934 | aspartate carbamoyltransferase                              | COG0540 | [F]   |
| feature:167734036 | permease YjgP/YjgQ family protein                           | NA      | NA    |
| feature:167734040 | organic solvent tolerance-like protein                      | COG1452 | [M]   |
| feature:167734046 | 4-hydroxythreonine-4-phosphate dehydrogenase                | NA      | NA    |
| feature:167734050 | dimethyladenosine transferase                               | COG0030 | [J]   |
| feature:167734136 | glycine dehydrogenase                                       | COG0403 | [E]   |
| feature:167734138 | glycine cleavage H-protein                                  | COG0509 | [E]   |
| feature:167734142 | integral membrane protein                                   | COG0697 | [GER] |
| feature:167774847 | alanine-tRNA ligase                                         | COG0013 | [J]   |
| feature:167774851 | phosphatidylserine decarboxylase                            | COG0688 | [I]   |
| feature:167774857 | glycosyl transferase family 8                               | NA      | NA    |
| feature:167774861 | IMP dehydrogenase-like protein                              | COG0516 | [F]   |
| feature:167774887 | glycine dehydrogenase                                       | COG0403 | [E]   |
| feature:167774889 | glycine cleavage system protein P2 gcvP                     | COG0403 | [E]   |
| feature:167774893 | glycine dehydrogenase                                       | COG1003 | [E]   |
| feature:167774895 | Flavin containing amine oxidoreductase                      | COG2907 | [R]   |
| feature:167774897 | hypothetical protein PU1002_03016                           | COG3496 | [S]   |
| feature:167818750 | nitrogen regulation protein ntrY                            | NA      | NA    |
| feature:167818752 | IspD/ispF bifunctional enzyme                               | COG1211 | [I]   |
| feature:167818756 | phosphatidylglycerophosphatase A                            | COG1267 | [I]   |
| feature:167818758 | competence/damage-inducible protein CinA                    | COG1546 | [R]   |
| feature:167818760 | polyketide cyclase/dehydrase superfamily protein            | COG2867 | [I]   |
| feature:167818762 | lipoyl synthase                                             | COG0320 | [H]   |
| feature:167818766 | Enolase                                                     | COG0148 | [G]   |
| feature:167818768 | 2-dehydro-3-deoxy-phosphooctonate aldolase                  | COG2877 | [M]   |
| feature:167818772 | preprotein translocase SecE subunit                         | COG1314 | [U]   |
| feature:167818774 | triosephosphate isomerase (tim)                             | COG0149 | [G]   |
| feature:167818780 | anthranilate synthase component I-like protein              | COG0147 | [EH]  |
| feature:167818782 | anthranilate synthase component II                          | COG0512 | [EH]  |
| feature:167818786 | indole-3-glycerol phosphate synthase/anthranilate isomerase | COG0134 | [E]   |
| feature:167818790 | glutamyl-tRNA synthetase                                    | COG0008 | [J]   |

|                   |                                                                          |         |       |
|-------------------|--------------------------------------------------------------------------|---------|-------|
| feature:167818794 | conserved hypothetical protein                                           | COG3494 | [S]   |
| feature:167818798 | glucosamine N-acyltransferase                                            | COG1044 | [M]   |
| feature:167818800 | (3R)-hydroxymyristoyl-[acyl carrier protein] dehydratase                 | COG0764 | [I]   |
| feature:167818802 | Outer membrane protein (OmpH-like)                                       | NA      | NA    |
| feature:167818818 | 30S ribosomal protein S2                                                 | COG0052 | [J]   |
| feature:167818826 | prolyl-tRNA synthetase                                                   | COG0442 | [J]   |
| feature:167818832 | Bvg accessory factor                                                     | COG1521 | [K]   |
| feature:167818840 | NADH dehydrogenase subunit M                                             | COG1008 | [C]   |
| feature:167818842 | NADH Dehydrogenase I Chain L                                             | COG1009 | [CP]  |
| feature:167818852 | NADH dehydrogenase subunit G                                             | COG1034 | [C]   |
| feature:167818854 | NADH dehydrogenase I subunit F                                           | COG1894 | [C]   |
| feature:167818856 | NADH Dehydrogenase I Chain E                                             | COG1905 | [C]   |
| feature:167818858 | NADH dehydrogenase delta subunit                                         | COG0649 | [C]   |
| feature:167818866 | ATP-dependent protease La                                                | COG0466 | [O]   |
| feature:167818868 | ATP-dependent protease La                                                | COG0466 | [O]   |
| feature:167818870 | ATP-dependent clp proteinase regulatory chain X                          | COG1219 | [O]   |
| feature:167818900 | TRAP-type mannitol/chloroaromatic compound transport system protein      | COG4665 | [Q]   |
| feature:167818950 | AMP-dependent synthetase and ligase                                      | NA      | NA    |
| feature:167818960 | oxidoreductase, FAD-binding                                              | COG0665 | [E]   |
| feature:167818962 | putative acetolactate synthase large subunit                             | COG0028 | [EH]  |
| feature:167818978 | bifunctional proline dehydrogenase/pyrroline-5-carboxylate dehydrogenase | COG4230 | [C]   |
| feature:167818990 | hypothetical protein PU1002_00095                                        | NA      | NA    |
| feature:167818996 | AziC protein                                                             | COG1296 | [E]   |
| feature:167819002 | hypothetical protein PU1002_00090                                        | COG4392 | [S]   |
| feature:167819010 | iron-uptake ABC transport system periplasmic iron-binding protein        | COG1840 | [P]   |
| feature:167819056 | oxidoreductase, short chain dehydrogenase/reductase family               | COG1028 | [IQR] |
| feature:167819096 | hypothetical protein Avi_3473                                            | COG0678 | [O]   |
| feature:167819124 | hypothetical protein SAR11_1269                                          | NA      | NA    |
| feature:167819138 | alpha/beta hydrolase fold protein                                        | COG0596 | [R]   |
| feature:167819174 | glycine betaine/L-proline transport system permease                      | NA      | NA    |
| feature:167819204 | putative monomeric sarcosine oxidase                                     | COG0665 | [E]   |
| feature:167819212 | glutamate synthase large subunit-like protein                            | COG0069 | [E]   |
| feature:167819336 | nucleotidyltransferase family protein                                    | NA      | NA    |
| feature:167819344 | AcrB/AcrD/AcrF family protein (Acriflavin resistance)                    | COG0841 | [V]   |
| feature:167819356 | drug/metabolite transporter                                              | COG0697 | [GER] |
| feature:167819358 | DNA-3-methyladenine glycosylase I                                        | COG0122 | [L]   |
| feature:167819360 | hypothetical protein SAR11_0185                                          | COG5470 | [S]   |
| feature:167819368 | hypothetical protein PU1002_05456                                        | NA      | NA    |
| feature:167819370 | oligopeptidase B                                                         | COG1770 | [E]   |
| feature:167819376 | dapA-like protein                                                        | NA      | NA    |
| feature:167819386 | protein that suppresses inhibitory activity of Csr A                     | COG0312 | [R]   |
| feature:167819406 | probable ATP-dependent RNA helicase                                      | COG0513 | [LKJ] |
| feature:167866888 | fructose-bisphosphate aldolase                                           | COG3588 | [G]   |
| feature:167866914 | translocation protein TolB                                               | COG0823 | [U]   |
| feature:167866920 | hypothetical protein PU1002_03336                                        | NA      | NA    |
| feature:167866928 | ATP-dependent Zn protease                                                | COG0465 | [O]   |
| feature:167866970 | dihydroorotase                                                           | COG0044 | [F]   |
| feature:167866972 | small multidrug resistance protein                                       | COG2076 | [P]   |
| feature:167867006 | alanine-tRNA ligase                                                      | COG0013 | [J]   |

|                   |                                                                       |         |       |
|-------------------|-----------------------------------------------------------------------|---------|-------|
| feature:167867008 | alanine-tRNA ligase                                                   | COG0013 | [J]   |
| feature:167867014 | phosphatidylserine synthase                                           | COG1183 | [I]   |
| feature:167867016 | Glycosyl transferase family 8                                         | NA      | NA    |
| feature:167867022 | TPR-like                                                              | NA      | NA    |
| feature:167867024 | bifunctional GMP synthase/glutamine amidotransferase protein          | COG0519 | [F]   |
| feature:167867026 | 3-methyl-2-oxobutanoate hydroxymethyltransferase                      | COG0413 | [H]   |
| feature:167867048 | agmatinase                                                            | COG0010 | [E]   |
| feature:167888776 | ATP-dependent Clp protease proteolytic subunit                        | COG0740 | [OU]  |
| feature:167888780 | ATP-dependent protease La                                             | COG0466 | [O]   |
| feature:167888784 | NADH dehydrogenase I chain A                                          | COG0838 | [C]   |
| feature:167888786 | NADH dehydrogenase subunit B                                          | COG0377 | [C]   |
| feature:167888788 | NADH dehydrogenase I chain C                                          | COG0852 | [C]   |
| feature:167888800 | NADH Dehydrogenase I Chain H                                          | COG1005 | [C]   |
| feature:167888802 | NADH dehydrogenase subunit I                                          | COG1143 | [C]   |
| feature:167888804 | NADH dehydrogenase I chain J                                          | COG0839 | [C]   |
| feature:167888812 | NADH dehydrogenase subunit N                                          | COG1007 | [C]   |
| feature:167888818 | metallo-beta-lactamase family protein                                 | COG0595 | [R]   |
| feature:167888820 | conserved hypothetical protein                                        | NA      | NA    |
| feature:167888826 | prolyl-tRNA synthetase                                                | COG0442 | [J]   |
| feature:167888828 | ABC transporter                                                       | COG4591 | [M]   |
| feature:167888842 | putative undecaprenyl diphosphate synthase                            | COG0020 | [I]   |
| feature:167888846 | 1-deoxy-D-xylulose 5-phosphate reductoisomerase                       | COG0743 | [I]   |
| feature:167888856 | acyl-[acyl carrier protein]-UDP-N-acetylglucosamine O-acyltransferase | COG1043 | [M]   |
| feature:167888858 | hypothetical protein PU1002_01826                                     | NA      | NA    |
| feature:167888866 | LexA repressor                                                        | COG1974 | [KT]  |
| feature:167888870 | anthranilate phosphoribosyltransferase                                | COG0547 | [E]   |
| feature:167888882 | CTP synthetase                                                        | COG0504 | [F]   |
| feature:167888886 | CTP synthase                                                          | COG0504 | [F]   |
| feature:167888890 | Enolase                                                               | COG0148 | [G]   |
| feature:167888902 | IspD/ispF bifunctional enzyme                                         | COG0245 | [I]   |
| feature:167907230 | heat shock protein                                                    | NA      | NA    |
| feature:167907232 | oligopeptidase B                                                      | COG1770 | [E]   |
| feature:167907240 | Xanthine/uracil/vitamin C permease family protein                     | COG2252 | [R]   |
| feature:167907242 | phosphoribosyltransferase                                             | COG2236 | [R]   |
| feature:167907250 | DMT family permease                                                   | COG0697 | [GER] |
| feature:167907252 | Peptide methionine sulfoxide reductase                                | COG0225 | [O]   |
| feature:167907254 | thiosulfate sulfurtransferase                                         | COG2897 | [P]   |
| feature:167907256 | HlyD family-like protein                                              | COG0845 | [M]   |
| feature:167907258 | AcrB/AcrD/AcrF family protein (Acriflavin resistance)                 | COG0841 | [V]   |
| feature:167907260 | AcrB/AcrD/AcrF family protein (acriflavin resistance)                 | COG0841 | [V]   |
| feature:167907262 | soluble lytic murein transglycosylase                                 | COG4764 | [S]   |
| feature:167907264 | 2,3-bisphosphoglycerate-dependent phosphoglycerate mutase             | COG0588 | [G]   |
| feature:167907322 | glutamate 5-kinase                                                    | COG0263 | [E]   |
| feature:167907346 | probable primosomal protein N                                         | NA      | NA    |
| feature:167907348 | probable primosomal protein N                                         | COG1198 | [L]   |
| feature:167907354 | 2-oxoglutarate dehydrogenase complex E2 component                     | COG0508 | [C]   |
| feature:167907368 | succinate dehydrogenase                                               | COG0479 | [C]   |
| feature:167907370 | succinate dehydrogenase iron-sulfur subunit                           | COG0479 | [C]   |
| feature:167907386 | acyl-CoA dehydrogenase                                                | COG1960 | [I]   |
| feature:167907406 | cell division particle                                                | COG0552 | [U]   |
| feature:167907412 | Transporter                                                           | COG0697 | [GER] |

|                   |                                                                  |         |     |
|-------------------|------------------------------------------------------------------|---------|-----|
| feature:167907424 | mannitol transporter                                             | COG4665 | [Q] |
| feature:167907442 | (S)-2-hydroxy-acid oxidase                                       | COG0247 | [C] |
| feature:167907542 | putative Sulfotransferase domain protein                         | NA      | NA  |
| feature:167907592 | hypothetical protein SAR11_0343                                  | COG1806 | [S] |
| feature:167907594 | uroporphyrinogen decarboxylase                                   | COG0407 | [H] |
| feature:167907602 | tRNA uridine 5-carboxymethylaminomethyl modification enzyme GidA | COG0445 | [D] |
| feature:167907608 | DNA-directed DNA polymerase III                                  | NA      | NA  |
| feature:167907614 | Leucyl-tRNA synthetase                                           | COG0495 | [J] |

**Paralogous genes in ACE\_P3.2**

| <b>Gene ID</b>    | <b>Annotation</b>                                                    | <b>COG</b> | <b>COG Category</b> |
|-------------------|----------------------------------------------------------------------|------------|---------------------|
| feature:167687116 | IclR family transcriptional regulator                                | NA         | NA                  |
| feature:167687124 | fumarate lyase                                                       | COG0015    | [F]                 |
| feature:167687138 | Oligopeptide/dipeptide transporter domain family protein             | COG0444    | [EP]                |
| feature:167687158 | ribonuclease E/G                                                     | COG1530    | [J]                 |
| feature:167687160 | ribonuclease E/G                                                     | COG1530    | [J]                 |
| feature:167687166 | peptide chain release factor 2                                       | COG1186    | [J]                 |
| feature:167687172 | anhydro-N-acetylmuramic acid kinase                                  | COG2377    | [O]                 |
| feature:167687176 | alpha/beta hydrolase                                                 | COG2945    | [R]                 |
| feature:167687202 | betaine aldehyde dehydrogenase (BADH) protein                        | COG1012    | [C]                 |
| feature:167687216 | Methionine sulfoxide reductase B                                     | COG0229    | [O]                 |
| feature:167687234 | short chain dehydrogenase                                            | COG1028    | [IQR]               |
| feature:167687268 | glycine dehydrogenase                                                | COG0403    | [E]                 |
| feature:167687280 | glycyl-tRNA synthetase subunit beta                                  | COG0751    | [J]                 |
| feature:167687284 | glycyl-tRNA synthetase subunit beta                                  | COG0751    | [J]                 |
| feature:167687290 | nicotinate-nucleotide pyrophosphorylase                              | COG0157    | [H]                 |
| feature:167687350 | metallo-beta-lactamase family protein                                | COG0595    | [R]                 |
| feature:167687358 | Lipoprotein releasing system, transmembrane protein n, LoIC/E family | COG4591    | [M]                 |
| feature:167687366 | DNA polymerase III alpha subunit                                     | COG0587    | [L]                 |
| feature:167687372 | elongation factor Ts                                                 | COG0264    | [J]                 |
| feature:167687376 | putative undecaprenyl diphosphate synthase                           | COG0020    | [I]                 |
| feature:167687396 | citrate synthase                                                     | COG0372    | [C]                 |
| feature:167687416 | 3-deoxy-8-phosphooctulonate synthase                                 | COG2877    | [M]                 |
| feature:167730530 | heparinase II/III family protein                                     | NA         | NA                  |
| feature:167730538 | hypothetical protein MELB17_17679                                    | COG0596    | [R]                 |
| feature:167730560 | shikimate 5-dehydrogenase                                            | COG0169    | [E]                 |
| feature:167730582 | putative glutamine amidotransferase class-I                          | COG0118    | [E]                 |
| feature:167730634 | DNA-(apurinic or apyrimidinic site) lyase / endonuclease III         | COG0177    | [L]                 |
| feature:167730640 | dihydrodipicolinate reductase                                        | COG0289    | [E]                 |
| feature:167730642 | Chaperone protein                                                    | COG0484    | [O]                 |
| feature:167730660 | possible transmembrane receptor                                      | NA         | NA                  |
| feature:167730696 | hypothetical protein                                                 | NA         | NA                  |
| feature:167730746 | DNA gyrase, B subunit                                                | COG0187    | [L]                 |
| feature:167730754 | deoxyhypusine synthase-like protein                                  | COG1899    | [O]                 |
| feature:167730778 | adenosylhomocysteinase                                               | COG0499    | [H]                 |
| feature:167730794 | AcrB/AcrD/AcrF family protein                                        | COG0841    | [V]                 |
| feature:167730822 | oligopeptidase B                                                     | COG1770    | [E]                 |
| feature:167730878 | L-aspartate oxidase                                                  | COG0029    | [H]                 |
| feature:167730902 | short chain dehydrogenase                                            | COG1028    | [IQR]               |
| feature:167730916 | mandelate racemase/muconate lactonizing enzyme, N-                   | COG4948    | [MR]                |

|                   |                                                                           |         |       |
|-------------------|---------------------------------------------------------------------------|---------|-------|
|                   | terminal domain protein                                                   |         |       |
| feature:167730918 | mandelate racemase/muconate lactonizing enzyme, N-terminal domain protein | COG4948 | [MR]  |
| feature:167730954 | Fe(3+) ions import ATP-binding protein FbpC                               | COG3842 | [E]   |
| feature:167730970 | Phosphate permease                                                        | COG0306 | [P]   |
| feature:167730978 | betaine aldehyde dehydrogenase (BADH) protein                             | COG1012 | [C]   |
| feature:167730994 | acetylornithine aminotransferase                                          | COG4992 | [E]   |
| feature:167731052 | peptide chain release factor 1                                            | NA      | NA    |
| feature:167731054 | peptide chain release factor 1                                            | COG0216 | [J]   |
| feature:167731146 | Carbamoyltransferase                                                      | COG2192 | [O]   |
| feature:167731170 | NAD(p) transhydrogenase subunit beta                                      | COG1282 | [C]   |
| feature:167731174 | penicillin binding protein transpeptide                                   | COG0768 | [M]   |
| feature:167731178 | rod shape-determining protein rodA                                        | COG0772 | [D]   |
| feature:167731184 | transport protein                                                         | COG0697 | [GER] |
| feature:167731206 | thymidylate synthase-complementing family protein (Pfam)                  | COG1351 | [F]   |
| feature:167731230 | putative Trypsin                                                          | COG0265 | [O]   |
| feature:167731244 | putative HMGL-like protein                                                | COG0119 | [E]   |
| feature:167731262 | thiamine-phosphate pyrophosphorylase                                      | COG0352 | [H]   |
| feature:167774801 | DSBA oxidoreductase                                                       | COG3917 | [Q]   |
| feature:167774819 | thioredoxin-disulfide reductase                                           | COG0492 | [O]   |
| feature:167816076 | transcriptional regulator, NtrC family                                    | COG2204 | [T]   |
| feature:167816086 | amino acid ABC transporter                                                | COG4597 | [E]   |
| feature:167816120 | dihydroxy-acid dehydratase                                                | COG0129 | [EG]  |
| feature:167816152 | acetoacetate-CoA ligase                                                   | COG0365 | [I]   |
| feature:167816200 | ATP-dependent DNA helicase RecG                                           | COG1200 | [LK]  |
| feature:167816208 | excinuclease ABC chain A                                                  | COG0178 | [L]   |
| feature:167824428 | putative LysE type translocator                                           | COG1280 | [E]   |
| feature:167824432 | fumarylacetoacetate hydrolase family protein                              | COG0179 | [Q]   |
| feature:167824438 | malonyl-CoA decarboxylase                                                 | COG1593 | [G]   |
| feature:167824444 | trap dicarboxylate transporter- dctp subunit                              | COG1638 | [G]   |
| feature:167824456 | 3-hydroxyisobutyrate dehydrogenase                                        | COG2084 | [I]   |
| feature:167824494 | Acetaldehyde dehydrogenase II (ACDH-II)                                   | COG1012 | [C]   |
| feature:167824496 | ammonium transporter                                                      | COG0004 | [P]   |
| feature:167824500 | Heptosyltransferase family                                                | NA      | NA    |
| feature:167824512 | phosphoserine aminotransferase                                            | COG1932 | [HE]  |
| feature:167824520 | putative peptidase family M50                                             | COG0750 | [M]   |
| feature:167824530 | putative zinc-binding dehydrogenase                                       | NA      | NA    |
| feature:167824574 | taurine dioxygenase                                                       | COG2175 | [Q]   |
| feature:167824580 | aconitate hydratase 1                                                     | COG1048 | [C]   |
| feature:167824582 | aconitate hydratase                                                       | COG1048 | [C]   |
| feature:167824586 | aconitate hydratase                                                       | COG1048 | [C]   |
| feature:167824592 | aconitate hydratase 1                                                     | COG1048 | [C]   |
| feature:167824594 | putative short-chain dehydrogenase/reductase SDR                          | COG1028 | [IQR] |
| feature:167824606 | hypothetical protein BAL199_01704                                         | COG0028 | [EH]  |
| feature:167824622 | Methionine sulfoxide reductase B                                          | COG0229 | [O]   |
| feature:167824638 | hypothetical protein                                                      | NA      | NA    |
| feature:167824682 | O-succinylhomoserine sulfhydrylase                                        | COG0626 | [E]   |
| feature:167824686 | Pc22g04140                                                                | COG4221 | [R]   |
| feature:167824714 | UDP-N-acetylmuramate--L-alanine ligase                                    | COG0773 | [M]   |
| feature:167824728 | UDP-N-acetylmuramoylalanine--D-glutamate ligase                           | COG0771 | [M]   |
| feature:167824732 | phospho-N-acetylmuramoyl-pentapeptide-transferase                         | COG0472 | [M]   |
| feature:167824750 | lipoprotein                                                               | COG2853 | [M]   |
| feature:167824782 | thioredoxin reductase                                                     | COG0492 | [O]   |

|                   |                                                                             |         |       |
|-------------------|-----------------------------------------------------------------------------|---------|-------|
| feature:167824800 | excinuclease ABC subunit C                                                  | COG0322 | [L]   |
| feature:167824852 | site-specific DNA methyltransferase                                         | COG0863 | [L]   |
| feature:167824910 | TldD protein                                                                | COG0312 | [R]   |
| feature:167824922 | putative modulator of DNA gyrase                                            | COG0312 | [R]   |
| feature:167824924 | putative modulator of DNA gyrase                                            | COG0312 | [R]   |
| feature:167824932 | 3-deoxy-D-manno-octulosonic-acid transferase                                | NA      | NA    |
| feature:167824942 | exodeoxyribonuclease VII, large subunit                                     | COG1570 | [L]   |
| feature:167825016 | ATP phosphoribosyltransferase regulatory subunit, putative                  | COG3705 | [E]   |
| feature:167825054 | dihydrolipoamide S-acetyltransferase                                        | COG0508 | [C]   |
| feature:167825074 | phenylalanyl-tRNA synthetase subunit alpha                                  | COG0016 | [J]   |
| feature:167825092 | glutamate synthase, large subunit                                           | COG0070 | [E]   |
| feature:167825106 | arabinose 5-phosphate isomerase                                             | COG0517 | [R]   |
| feature:167825130 | tryptophan synthase, alpha subunit                                          | NA      | NA    |
| feature:167825168 | hypothetical protein                                                        | NA      | NA    |
| feature:167825170 | 'Cold-shock' DNA-binding domain, putative                                   | COG1278 | [K]   |
| feature:167825216 | cytochrome C                                                                | NA      | NA    |
| feature:167825296 | argininosuccinate lyase                                                     | COG0165 | [E]   |
| feature:167825326 | gamma-glutamyl phosphate reductase                                          | COG0014 | [E]   |
| feature:167825344 | FOF1 ATP synthase subunit gamma                                             | COG0224 | [C]   |
| feature:167825348 | FOF1 ATP synthase subunit alpha                                             | COG0056 | [C]   |
| feature:167825362 | dihydrolipoamide dehydrogenase                                              | COG1249 | [C]   |
| feature:167825418 | mannitol transporter                                                        | COG4665 | [Q]   |
| feature:167825426 | (S)-2-hydroxy-acid oxidase                                                  | COG0247 | [C]   |
| feature:167825430 | (S)-2-hydroxy-acid oxidase                                                  | COG0277 | [C]   |
| feature:167825438 | probable aspartate transaminase                                             | COG0436 | [E]   |
| feature:167825442 | putative FMN-dependent dehydrogenase                                        | COG1304 | [C]   |
| feature:167825450 | Cytochrome c-type biogenesis protein                                        | COG1138 | [O]   |
| feature:167905348 | hypothetical protein MED121_17284                                           | COG3333 | [S]   |
| feature:167905350 | hypothetical protein SSE37_02345                                            | COG3181 | [S]   |
| feature:167905396 | hypothetical protein PU1002_00095                                           | COG0697 | [GER] |
| feature:167905452 | hypothetical protein Oant_0061                                              | NA      | NA    |
| feature:167905458 | glucose-methanol-choline oxidoreductase                                     | COG2303 | [E]   |
| feature:167905496 | RNA polymerase sigma factor                                                 | COG0568 | [K]   |
| feature:167905500 | phosphomethylpyrimidine kinase                                              | COG0351 | [H]   |
| feature:167905508 | ATP-dependent metalloprotease FtsH                                          | COG0465 | [O]   |
| feature:167905542 | hypothetical protein Sbal_4504                                              | COG0057 | [G]   |
| feature:167932900 | V-type H(+)-translocating pyrophosphatase                                   | COG3808 | [C]   |
| feature:167932904 | membrane-bound proton-translocating pyrophosphatase                         | COG3808 | [C]   |
| feature:167932928 | DNA topoisomerase IV subunit A                                              | NA      | NA    |
| feature:167932954 | putative soluble lytic murein transglycosylase                              | NA      | NA    |
| feature:167932972 | glutamyl-tRNA(Gln) amidotransferase subunit A                               | COG0154 | [J]   |
| feature:167933044 | ribosomal protein S3                                                        | COG0092 | [J]   |
| feature:167933066 | DNA-directed RNA polymerase, beta' subunit                                  | COG0086 | [K]   |
| feature:167933070 | DNA-directed RNA polymerase, beta subunit                                   | COG0085 | [K]   |
| feature:167933112 | DNA topoisomerase IV subunit B                                              | COG0187 | [L]   |
| feature:167933204 | phosphoribosylformylglycinamide synthase II (FGA M synthase II)             | COG0046 | [F]   |
| feature:167933238 | glutamine-fructose-6-phosphate transaminase (isomerizing)                   | COG0449 | [M]   |
| feature:167933278 | L-carnitine dehydrogenase                                                   | COG1804 | [C]   |
| feature:167933292 | Mandelate racemase / muconate lactonizing enzyme, C-terminal domain protein | COG4948 | [MR]  |
| feature:167933300 | histone deacetylase family protein                                          | COG0123 | [BQ]  |

| feature:167935908                   | integrase/recombinase xerD-like protein                                                  | COG0582    | [L]                 |
|-------------------------------------|------------------------------------------------------------------------------------------|------------|---------------------|
| feature:167935926                   | DNA gyrase, A subunit                                                                    | COG0188    | [L]                 |
| <b>Paralogous genes in IMCC9063</b> |                                                                                          |            |                     |
| <b>Gene ID</b>                      | <b>Annotation</b>                                                                        | <b>COG</b> | <b>COG Category</b> |
| SAR11G3_00007                       | HflK protein                                                                             | COG0330    | [O]                 |
| SAR11G3_00022                       | hypothetical transport protein                                                           | COG0697    | [GER]               |
| SAR11G3_00052                       | imidazole glycerol phosphate synthase cyclase subunit                                    | COG0107    | [E]                 |
| SAR11G3_00053                       | imidazole glycerol phosphate synthase amidotransferase subunit                           | COG0118    | [E]                 |
| SAR11G3_00062                       | dTDP-glucose 4,6-dehydratase                                                             | COG0451    | [MG]                |
| SAR11G3_00063                       | carbamoyltransferase                                                                     | COG2192    | [O]                 |
| SAR11G3_00081                       | CDP-glucose 4,6-dehydratase-like protein                                                 | COG0451    | [MG]                |
| SAR11G3_00082                       | glucose-1-phosphate cytidylyltransferase                                                 | COG1208    | [MJ]                |
| SAR11G3_00096                       | amidase                                                                                  | COG0154    | [J]                 |
| SAR11G3_00106                       | putative short-chain dehydrogenase family protein                                        | COG1028    | [IQR]               |
| SAR11G3_00109                       | imidazole glycerol phosphate synthase cyclase subunit                                    | COG0107    | [E]                 |
| SAR11G3_00110                       | hypothetical protein                                                                     | COG0118    | [E]                 |
| SAR11G3_00122                       | phospholipid-lipopolysaccharide ABC transporter                                          | COG1132    | [V]                 |
| SAR11G3_00188                       | ferric iron ABC transporter, permease protein                                            | COG3842    | [E]                 |
| SAR11G3_00195                       | phosphate regulon transcriptional regulatory protein PhoB (SphR)                         | COG0745    | [TK]                |
| SAR11G3_00211                       | hypothetical protein                                                                     | NA         | NA                  |
| SAR11G3_00229                       | leader peptidase (Prepilin peptidase) / N-methyltransferase                              | COG1989    | [NOU]               |
| SAR11G3_00241                       | TRAP transporter solute receptor, TAXI family precursor                                  | COG2358    | [R]                 |
| SAR11G3_00249                       | dehydrogenases with different specificities (short-chain alcohol dehydrogenase)          | COG1028    | [IQR]               |
| SAR11G3_00254                       | pyruvate dehydrogenase E1 component                                                      | COG2609    | [C]                 |
| SAR11G3_00296                       | peptide methionine sulfoxide reductase MsrA                                              | COG0225    | [O]                 |
| SAR11G3_00300                       | RND multidrug efflux transporter; Acriflavin resistance protein                          | COG0841    | [V]                 |
| SAR11G3_00316                       | agmatinase                                                                               | NA         | NA                  |
| SAR11G3_00329                       | phosphopantothenoylcysteine decarboxylase / Phosphopantothenoylcysteine synthetase       | COG0452    | [H]                 |
| SAR11G3_00336                       | peptide methionine sulfoxide reductase MsrB                                              | COG0229    | [O]                 |
| SAR11G3_00375                       | ygjD/Kae1/Qri7 family, required for threonylcarbamoyladenosine (t(6)A) formation in tRNA | COG0533    | [O]                 |
| SAR11G3_00484                       | putative primosomal protein N                                                            | COG1198    | [L]                 |
| SAR11G3_00519                       | long-chain-fatty-acid--CoA ligase                                                        | COG1022    | [I]                 |
| SAR11G3_00562                       | cold shock DNA-binding domain protein                                                    | COG1278    | [K]                 |
| SAR11G3_00586                       | tryptophan synthase alpha chain                                                          | COG0159    | [E]                 |
| SAR11G3_00638                       | histidine-tRNA ligase                                                                    | NA         | NA                  |
| SAR11G3_00639                       | histidine-tRNA ligase                                                                    | COG3705    | [E]                 |
| SAR11G3_00656                       | exodeoxyribonuclease VII large subunit                                                   | COG1570    | [L]                 |
| SAR11G3_00665                       | (S)-2-haloacid dehalogenase                                                              | COG1011    | [R]                 |
| SAR11G3_00671                       | hypothetical protein                                                                     | COG0517    | [R]                 |
| SAR11G3_00676                       | alternative cytochrome c oxidase polypeptide CoxN                                        | COG0843    | [C]                 |
| SAR11G3_00677                       | alternative cytochrome c oxidase polypeptide CoxM                                        | COG1622    | [C]                 |
| SAR11G3_00721                       | uncharacterized ACR                                                                      | COG1496    | [S]                 |
| SAR11G3_00730                       | excinuclease ABC subunit C                                                               | COG0322    | [L]                 |
| SAR11G3_00755                       | UDP-N-acetylmuramoylalanyl-D-glutamyl-2,6-diaminopimelate--D-alanyl-D-alanine ligase     | COG0770    | [M]                 |



|               |                                                                  |         |       |
|---------------|------------------------------------------------------------------|---------|-------|
| SAR11G3_00758 | cell division protein FtsW                                       | COG0772 | [D]   |
| SAR11G3_00782 | hypothetical protein                                             | COG2391 | [R]   |
| SAR11G3_00801 | mmgE/PrpD                                                        | NA      | NA    |
| SAR11G3_00815 | 3-oxoacyl-[acyl-carrier protein] reductase                       | COG1028 | [IQR] |
| SAR11G3_00850 | ammonium transporter                                             | COG0004 | [P]   |
| SAR11G3_00851 | aldehyde dehydrogenase                                           | COG1012 | [C]   |
| SAR11G3_00868 | fumarate lyase                                                   | NA      | NA    |
| SAR11G3_00869 | putative exported protein                                        | NA      | NA    |
| SAR11G3_00871 | tricarboxylate transport membrane protein TctA                   | COG3333 | [S]   |
| SAR11G3_00884 | fumarylacetoacetate hydrolase family protein                     | COG0179 | [Q]   |
| SAR11G3_00888 | transporter, LysE family                                         | COG1280 | [E]   |
| SAR11G3_00915 | Glutamine-hydrolyzing GMP synthase                               | COG0518 | [F]   |
| SAR11G3_00925 | membrane protein                                                 | COG1033 | [R]   |
| SAR11G3_00927 | alanine racemase                                                 | COG0787 | [M]   |
| SAR11G3_00945 | putative phosphoribosylformylglycinamide cyclo-ligase            | COG0150 | [F]   |
| SAR11G3_00973 | short chain dehydrogenase                                        | COG1028 | [IQR] |
| SAR11G3_00994 | glycyl-tRNA synthetase beta chain                                | COG0751 | [J]   |
| SAR11G3_01050 | indole-3-glycerol phosphate synthase                             | COG0134 | [E]   |
| SAR11G3_01053 | anthranilate synthase, amidotransferase component                | COG0512 | [EH]  |
| SAR11G3_01064 | lipoate synthase                                                 | COG0320 | [H]   |
| SAR11G3_01065 | lipoate synthase                                                 | COG0320 | [H]   |
| SAR11G3_01072 | nitrogen assimilation regulatory protein ntrX                    | COG2204 | [T]   |
| SAR11G3_01086 | deoxyribodipyrimidine photolyase                                 | NA      | NA    |
| SAR11G3_01170 | pyridoxine 5'-phosphate synthase                                 | COG0854 | [H]   |
| SAR11G3_01286 | phosphoglucosamine mutase / Phosphomannomutase                   | COG1109 | [G]   |
| SAR11G3_01300 | putative mandelate racemase/muconate lactonizing enzyme          | COG4948 | [MR]  |
| SAR11G3_01316 | aldehyde dehydrogenase                                           | COG1012 | [C]   |
| SAR11G3_01320 | AFG1-like ATPase                                                 | COG1485 | [R]   |
| SAR11G3_01343 | putative UBX domain                                              | NA      | NA    |
| SAR11G3_01348 | succinate dehydrogenase/fumarate reductase, flavoprotein subunit | COG1053 | [C]   |
| SAR11G3_01359 | hypothetical protein                                             | COG0697 | [GER] |
| SAR11G3_01372 | iron(III) ABC transporter                                        | COG3842 | [E]   |
| SAR11G3_01393 | hypothetical protein                                             | NA      | NA    |
| SAR11G3_01395 | major facilitator superfamily (MFS) transporter                  | NA      | NA    |
| SAR11G3_01438 | permease of the major facilitator superfamily                    | NA      | NA    |

**Genes with signatures of positive selection in ACE\_P3.2 vs HIMB114**

| <b>HIMB114 gene number &amp; annotation</b>                              | <b>ACE_P3.2 gene identifier &amp; annotation</b>       | <b>dN/dS*</b> | <b>COG</b> | <b>COG Category</b> |
|--------------------------------------------------------------------------|--------------------------------------------------------|---------------|------------|---------------------|
| HIMB114_1149, drug/metabolite transporter                                | feature:167687126, integral membrane protein, putative | 1.4586        | COG0697    | [GER]               |
| HIMB114_0784, conserved hypothetical protein                             | feature:167687168, conserved hypothetical protein      | 1.4274        | NA         | NA                  |
| HIMB114_0782, alpha/beta hydrolase                                       | feature:167687178, alpha/beta superfamily hydrolase    | 1.018         | COG2945    | [R]                 |
| HIMB114_0778, FeS assembly protein SufD                                  | feature:167687184, FeS assembly protein SufD           | 1.5523        | COG0719    | [O]                 |
| HIMB114_0855, putative glycine cleavage T protein                        | feature:167687206, predicted aminomethyltransferase    | 1.1647        | COG0354    | [R]                 |
| HIMB114_0303, pyridine nucleotide-disulphide oxidoreductase dimerization | feature:167687220, membrane protein, putative          | 1.2797        | COG0398    | [S]                 |

|                                                                                                                |                                                                                                                 |         |         |      |
|----------------------------------------------------------------------------------------------------------------|-----------------------------------------------------------------------------------------------------------------|---------|---------|------|
| region                                                                                                         |                                                                                                                 |         |         |      |
| HIMB114_0114, conserved hypothetical protein                                                                   | feature:167687242, hypothetical protein SAR11_1254                                                              | 1.7505  | NA      | NA   |
| HIMB114_0859, pyruvate, phosphate dikinase                                                                     | feature:167687286, pyruvate, phosphate dikinase                                                                 | 35.2411 | COG0574 | [G]  |
| HIMB114_0714, NADH dehydrogenase (quinone), g subunit                                                          | feature:167687326, NADH dehydrogenase gamma subunit                                                             | 1.3748  | COG1034 | [C]  |
| HIMB114_0697, translation elongation factor Ts                                                                 | feature:167687370, elongation factor Ts                                                                         | 1.0298  | COG0264 | [J]  |
| HIMB114_0692, outer membrane protein assembly complex, YaeT protein                                            | feature:167687382, outer membrane protein                                                                       | 1.3497  | COG4775 | [M]  |
| HIMB114_0680, anthranilate synthase component I                                                                | feature:167687406, anthranilate synthase component I-like protein                                               | 1.5901  | COG0147 | [EH] |
| HIMB114_0679, hypothetical protein                                                                             | feature:167687408, peptidyl-prolyl cis-trans isomerase domain-containing protein                                | 1.5899  | NA      | NA   |
| HIMB114_0669, phosphatidylglycerophosphatase A                                                                 | feature:167687430, ott:OTT_1074 pgpA; phosphatidylglycerophosphatase A; K01095 phosphatidylglycerophosphatase A | 1.5501  | COG1267 | [I]  |
| HIMB114_1291, hypothetical protein                                                                             | feature:167730482, hypothetical protein                                                                         | 1.2739  | NA      | NA   |
| HIMB114_1272, potential esterase                                                                               | feature:167730522, potential esterase                                                                           | 1.2854  | NA      | NA   |
| HIMB114_0558, uroporphyrinogen decarboxylase (URO-D) (UPD)                                                     | feature:167730552, uroporphyrinogen decarboxylase                                                               | 1.2913  | COG0407 | [H]  |
| HIMB114_1246, probable Smr                                                                                     | feature:167730572, Smr (small MutS related) protein                                                             | 1.1418  | NA      | NA   |
| HIMB114_1243, imidazole glycerol phosphate synthase, glutamine amidotransferase subunit                        | feature:167730580, putative glutamine amidotransferase class-I                                                  | 1.4974  | COG0118 | [E]  |
| HIMB114_1224, conserved hypothetical protein                                                                   | feature:167730624, hypothetical protein SAR11_0362                                                              | 1.577   | COG3786 | [S]  |
| HIMB114_1220, conserved hypothetical protein                                                                   | feature:167730630, hypothetical protein RB2654_17506                                                            | 1.7518  | COG3152 | [S]  |
| HIMB114_1150, conserved hypothetical protein                                                                   | feature:167730798, 3-mercaptopyruvate sulfurtransferase                                                         | 1.0854  | COG2897 | [P]  |
| HIMB114_0187, omega-amino acid--pyruvate aminotransferase (Omega-APT)(Beta-alanine--pyruvate aminotransferase) | feature:167730814, putative aminotransferase class-III                                                          | 1.2202  | COG0161 | [H]  |
| HIMB114_1141, protease 2 (Protease II) (Oligopeptidase B)                                                      | feature:167730820, oligopeptidase B                                                                             | 3.9625  | COG1770 | [E]  |
| HIMB114_1138, putative membrane-bound pili assembly protein Fimc                                               | feature:167730826, hypothetical protein                                                                         | 1.7379  | NA      | NA   |
| HIMB114_1135, conserved hypothetical protein                                                                   | feature:167730834, hypothetical protein ALOHA_HF4000133G03ctg1g26                                               | 1.2948  | NA      | NA   |
| HIMB114_0605, MatE efflux family protein                                                                       | feature:167730858, MatE efflux family protein                                                                   | 1.4433  | COG0534 | [V]  |
| HIMB114_1096, hypothetical protein                                                                             | feature:167730928, hypothetical protein SKA53_04713                                                             | 1.6863  | NA      | NA   |

|                                                                                                                   |                                                                                              |        |         |      |
|-------------------------------------------------------------------------------------------------------------------|----------------------------------------------------------------------------------------------|--------|---------|------|
| HIMB114_1054, molecular chaperone                                                                                 | feature:167731016, molecular chaperone                                                       | 1.449  | COG2214 | [O]  |
| HIMB114_1046, acetyl-CoA carboxylase, carboxyl transferase, alpha subunit                                         | feature:167731034, putative acetyl co-enzyme A carboxylase carboxyltransferase alpha subunit | 1.0383 | COG0825 | [I]  |
| HIMB114_1047, preprotein translocase, SecA subunit                                                                | feature:167731036, putative SecA protein, amino terminal region                              | 1.0218 | COG0653 | [U]  |
| HIMB114_0156, glucose-1-phosphate thymidyltransferase (dTDP-glucosyltransferase) (dTDP-glucose pyrophosphorylase) | feature:167731120, glucose-1-phosphate thymidyltransferase                                   | 3.1787 | COG1209 | [M]  |
| HIMB114_0179, GDP-mannose 4,6-dehydratase (GDP-D-mannose dehydratase)                                             | feature:167731130, gdpmannose 4,6-dehydratase                                                | 2.2966 | COG1089 | [M]  |
| HIMB114_0998, NAD dependent epimerase/dehydratase family protein                                                  | feature:167731134, NAD-dependent epimerase/dehydratase                                       | 1.2891 | COG0451 | [MG] |
| HIMB114_0960, cytochrome c-type biogenesis protein CcdA                                                           | feature:167731192, probable holocytochrome-c synthase ccdA                                   | 1.118  | COG0785 | [O]  |
| HIMB114_0956, conserved hypothetical protein                                                                      | feature:167731198, hypothetical protein PU1002_00130                                         | 4.6627 | COG1262 | [S]  |
| HIMB114_0938, hypothetical protein                                                                                | feature:167731250, putative rod shape-determining protein MreD                               | 1.4186 | NA      | NA   |
| HIMB114_0797, probable ATPase involved in DNA replication initiation                                              | feature:167774709, probable ATPase involved in DNA replication initiation                    | 1.0344 | COG0593 | [L]  |
| HIMB114_0799, hypothetical protein                                                                                | feature:167774711, possible membrane protein                                                 | 1.6918 | NA      | NA   |
| HIMB114_0803, probable cytosol aminopeptidase (Leucine aminopeptidase)(LAP) (Leucyl aminopeptidase)               | feature:167774719, leucyl aminopeptidase                                                     | 1.0534 | COG0260 | [E]  |
| HIMB114_0806, hypothetical protein                                                                                | feature:167774725, organic solvent tolerance-like protein                                    | 1.487  | COG1452 | [M]  |
| HIMB114_0808, pyridoxal phosphate biosynthetic protein PdxA                                                       | feature:167774729, 4-hydroxythreonine-4-phosphate dehydrogenase                              | 1.1864 | COG1995 | [H]  |
| HIMB114_0810, dimethyladenosine transferase                                                                       | feature:167774731, dimethyladenosine transferase                                             | 1.5821 | COG0030 | [J]  |
| HIMB114_0886, bacteriorhodopsin                                                                                   | feature:167774825, proteorhodopsin                                                           | 5.0057 | NA      | NA   |
| HIMB114_0659, conserved hypothetical protein                                                                      | feature:167816098, hypothetical protein OA2633_02196                                         | 1.5937 | COG3496 | [S]  |
| HIMB114_0602, single-stranded-DNA-specific exonuclease RecJ                                                       | feature:167816188, single-stranded-DNA-specific exonuclease RecJ                             | 1.0656 | COG0608 | [L]  |
| HIMB114_0374, protein YhdH                                                                                        | feature:167824532, zinc-binding alcohol dehydrogenase                                        | 1.999  | COG0604 | [CR] |
| HIMB114_0332, taurine dioxygenase                                                                                 | feature:167824576, taurine dioxygenase                                                       | 3.498  | COG2175 | [Q]  |
| HIMB114_0326, uptake gene product superfamily protein                                                             | feature:167824604, hypothetical protein MED121_17279                                         | 1.1876 | NA      | NA   |
| HIMB114_0287, cell division protein FtsA                                                                          | feature:167824706, cell division protein FtsA                                                | 1.1314 | NA      | NA   |
| HIMB114_0286, conserved hypothetical protein                                                                      | feature:167824708, putative cell division protein FtsQ                                       | 1.0794 | COG1589 | [M]  |

|                                                                                                                                                           |                                                                                             |        |         |      |
|-----------------------------------------------------------------------------------------------------------------------------------------------------------|---------------------------------------------------------------------------------------------|--------|---------|------|
| HIMB114_0284, UDP-N-acetylenolpyruvoylglucosamine reductase                                                                                               | feature:167824712, UDP-N-acetylenolpyruvoylglucosamine reductase                            | 1.0368 | COG0812 | [M]  |
| HIMB114_0279, UDP-N-acetylmuramoylalanyl-D-glutamyl-2, 6-diaminopimelate-D-alanyl-D-alanyl ligase                                                         | feature:167824734, UDP-N-acetylmuramoylalanyl-D-glutamate                                   | 1.4254 | COG0770 | [M]  |
| HIMB114_0278, UDP-N-acetylmuramoyl-L-alanyl-D-glutamate--2, 6-diaminopimelate ligase                                                                      | feature:167824736, UDP-N-acetylmuramoyl-tripeptide synthetase                               | 1.2665 | COG0769 | [M]  |
| HIMB114_0274, cell division protein FtsZ                                                                                                                  | feature:167824744, cell division protein FtsZ                                               | 1.23   | COG0206 | [D]  |
| HIMB114_0233, putative tetratricopeptide repeat protein                                                                                                   | feature:167824846, TPR repeat-containing protein                                            | 1.0868 | COG0457 | [R]  |
| HIMB114_0232, uracil DNA glycosylase superfamily                                                                                                          | feature:167824848, phage SPO1 DNA polymerase-related protein                                | 1.3824 | COG1573 | [L]  |
| HIMB114_0230, putative salicylate 1-monooxygenase                                                                                                         | feature:167824856, salicylate 1-monooxygenase                                               | 1.3615 | COG0654 | [HC] |
| HIMB114_0228, A/G-specific adenine glycosylase                                                                                                            | feature:167824858, A/G-specific adenine glycosylase                                         | 1.4595 | COG1194 | [L]  |
| HIMB114_0225, chromosome segregation protein SMC                                                                                                          | feature:167824864, smc protein                                                              | 3.2042 | COG1196 | [D]  |
| HIMB114_0221, H <sup>+</sup> -transporting two-sector ATPase                                                                                              | feature:167824872, H <sup>+</sup> -transporting two-sector ATPase (subunit b')              | 2.91   | COG0711 | [C]  |
| HIMB114_0888, phytoene synthase                                                                                                                           | feature:167824882, phytoene synthase                                                        | 1.0418 | COG1562 | [I]  |
| HIMB114_0890, putative transmembrane protein                                                                                                              | feature:167824886, transmembrane protein                                                    | 2.247  | NA      | NA   |
| HIMB114_0218, homoserine kinase                                                                                                                           | feature:167824890, homoserine kinase                                                        | 1.0382 | COG2334 | [R]  |
| HIMB114_0206, 4-hydroxybenzoate polyprenyl transferase                                                                                                    | feature:167824920, 4-hydroxybenzoate octaprenyltransferase                                  | 1.1922 | COG0382 | [H]  |
| HIMB114_0200, lipid A biosynthesis lauroyl acyltransferase                                                                                                | feature:167824936, lipid A biosynthesis lauroyl acyltransferase                             | 1.0948 | COG1560 | [M]  |
| HIMB114_0193, RNA methyltransferase, RsmD family                                                                                                          | feature:167824954, N6-adenine-specific methylase                                            | 1.5678 | NA      | NA   |
| HIMB114_0172, UDP-N-acetylglucosamine 1-carboxyvinyltransferase 1 (Enolpyruvate transferase 1) (UDP-N-acetylglucosamine enolpyruvyltransferase 1) (EPT 1) | feature:167825032, UDP-N-acetylglucosamine 1-carboxyvinyltransferase                        | 1.0406 | COG0766 | [M]  |
| HIMB114_0162, dihydrolipoyllysine-residue acetyltransferase component of pyruvate dehydrogenase complex                                                   | feature:167825052, pyruvate dehydrogenase, E2 component, dihydrolipoamide acetyltransferase | 1.7956 | COG0508 | [C]  |
| HIMB114_0184, methyltransferase FkbM                                                                                                                      | feature:167825060, methyltransferase FkbM                                                   | 1.8875 | NA      | NA   |
| HIMB114_0133, abc transporter ATP-binding protein                                                                                                         | feature:167825110, ABC transporter, ATP-binding protein                                     | 1.0384 | COG1137 | [R]  |
| HIMB114_0125, acetyl-coenzyme A carboxylase carboxyl transferase subunit beta (ACCase beta chain)                                                         | feature:167825132, acetyl-CoA carboxylase, carboxyl transferase, beta subunit               | 1.7998 | COG0777 | [I]  |
| HIMB114_0124, folylpolyglutamate synthase                                                                                                                 | feature:167825136, folylpolyglutamate synthetase                                            | 1.1331 | COG0285 | [H]  |

|                                                                                    |                                                                                         |        |         |       |
|------------------------------------------------------------------------------------|-----------------------------------------------------------------------------------------|--------|---------|-------|
| HIMB114_1389, peptide deformylase                                                  | feature:167825204, polypeptide deformylase                                              | 4.0255 | COG0242 | [J]   |
| HIMB114_1380, conserved hypothetical protein                                       | feature:167825224, hypothetical protein Bamb_4034                                       | 1.5937 | COG0730 | [R]   |
| HIMB114_1216, sodium:solute transporter family protein                             | feature:167825230, sodium:solute transporter family protein                             | 3.1746 | NA      | NA    |
| HIMB114_1376, ATP-dependent helicase                                               | feature:167825238, helicase, putative                                                   | 1.0371 | COG0513 | [LKJ] |
| HIMB114_1346, putative nicotinate-nucleotide adenyltransferase                     | feature:167825328, nicotinic acid mononucleotide adenyltransferase                      | 1.3789 | COG1057 | [H]   |
| HIMB114_1324, succinate dehydrogenase, cytochrome b556 subunit                     | feature:167825382, succinate dehydrogenase cytochrome B560 subunit (s dhC)              | 1.0625 | COG2009 | [C]   |
| HIMB114_1299, lipid A 3-O-deacylase (PagL) superfamily                             | feature:167825444, conserved hypothetical protein                                       | 1.4157 | COG2855 | [S]   |
| HIMB114_0335, putative integral membrane protein                                   | feature:167905354, putative integral membrane protein                                   | 1.0439 | NA      | NA    |
| HIMB114_0899, glycine betaine/L-proline transport system permease protein ProW     | feature:167905414, Binding-protein-dependent transport systems inner membrane component | 1.5376 | NA      | NA    |
| HIMB114_0874, pyrroline-5-carboxylate reductase                                    | feature:167905444, delta 1-pyrroline-5-carboxylate reductase                            | 1.0775 | NA      | NA    |
| HIMB114_1423, twin-arginine translocation pathway signal                           | feature:167905454, conserved hypothetical secreted protein                              | 1.8724 | NA      | NA    |
| HIMB114_1422, gluconate 2-dehydrogenase                                            | feature:167905456, putative 2-keto-gluconate dehydrogenase                              | 5.3099 | COG2303 | [E]   |
| HIMB114_0881, hypothetical protein                                                 | feature:167905474, hypothetical protein                                                 | 1.6622 | NA      | NA    |
| HIMB114_0894, Sua5/YciO/YrdC family protein                                        | feature:167905484, Sua5/YciO/YrdC family protein                                        | 7.2431 | COG0009 | [J]   |
| HIMB114_0911, cell cycle protein mesj                                              | feature:167905512, cell cycle protein mesj                                              | 1.1273 | COG0037 | [D]   |
| HIMB114_0582, hypothetical protein                                                 | feature:167932914, 5-amino-6-(5-phosphoribosylamino)uracil reductase                    | 1.5513 | COG0117 | [H]   |
| HIMB114_0557, delta-aminolevulinic acid dehydratase                                | feature:167932924, delta-aminolevulinic acid dehydratase                                | 1.1726 | COG0113 | [H]   |
| HIMB114_0568, 2-amino-4-hydroxy-6-hydroxymethylidihydropteridine pyrophosphokinase | feature:167932948, 2-amino-4-hydroxy-6-hydroxymethylidihydropteridine pyrophosphokinase | 1.0203 | COG0801 | [H]   |
| HIMB114_0530, CrcB protein                                                         | feature:167933002, hypothetical protein Hac_1601                                        | 1.1735 | COG0239 | [D]   |
| HIMB114_0529, ribosomal protein L17                                                | feature:167933004, ribosomal protein L17                                                | 1.4755 | COG0203 | [J]   |
| HIMB114_0487, putative porin                                                       | feature:167933090, putative porin                                                       | 1.3362 | NA      | NA    |
| HIMB114_0452, probable methyltransferase                                           | feature:167933258, probable methyltransferase                                           | 4.664  | NA      | NA    |
| HIMB114_0447, L-carnitine dehydratase/bile acid-inducible protein F                | feature:167933280, L-carnitine dehydrogenase                                            | 1.88   | COG1804 | [C]   |

**Genes with signatures of positive selection in ACE\_P1a.1 vs HTCC7211**

| <b>HTCC7211 gene number &amp; annotation</b>                               | <b>ACE_P1a.1 gene identifier &amp; annotation</b>                                 | <b>dN/dS*</b> | <b>COG</b> | <b>COG Category</b> |
|----------------------------------------------------------------------------|-----------------------------------------------------------------------------------|---------------|------------|---------------------|
| PB7211_759, probable N-acetylmuramoyl-L-alanine amidase YbjR               | feature:167713884, N-acetylmuramoyl-L-alanine amidase                             | 1.5912        | COG3023    | [V]                 |
| PB7211_420, cell division protein FtsZ                                     | feature:167713888, cell division protein FtsZ                                     | 1.0831        | COG0206    | [D]                 |
| PB7211_1331, UDP-N-acetylmuramoylalanine--D-glutamate ligase               | feature:167713904, UDP-N-acetylmuramoylalanine--D-glutamate ligase                | 1.3265        | COG0771    | [M]                 |
| PB7211_637, DNA uptake lipoprotein                                         | feature:167713926, DNA uptake lipoprotein                                         | 1.8721        | COG4105    | [R]                 |
| PB7211_63, penicillin-binding protein 2                                    | feature:167714004, penicillin binding protein transpeptide                        | 1.1065        | COG0768    | [M]                 |
| PB7211_386, branched-chain amino acid ABC transporter, ATP-binding protein | feature:167714068, branched-chain amino acid ABC transporter, ATP-binding protein | 1.2909        | COG0410    | [E]                 |
| PB7211_616, Integral membrane protein DUF6                                 | feature:167714094, hypothetical protein SAR11_1344                                | 2.2957        | NA         | NA                  |
| PB7211_366, PQQ enzyme repeat family protein                               | feature:167714174, PQQ repeat-containing protein                                  | 1.443         | NA         | NA                  |
| PB7211_1005, permease                                                      | feature:167717520, YadH-like ABC-2-type transport protein                         | 1.6095        | COG0842    | [V]                 |
| PB7211_723, GDP-mannose 4,6-dehydratase                                    | feature:167717612, NAD-dependent epimerase/dehydratase                            | 2.353         | NA         | NA                  |
| PB7211_342, 3-ketoacyl-CoA thiolase (Acetyl-CoA acyltransferase)           | feature:167717712, Acetyl-CoA acetyltransferase                                   | 1.1539        | COG0183    | [I]                 |
| PB7211_557, formamidopyrimidine-DNA glycosylase                            | feature:167717754, Formamidopyrimidine-DNA glycosylase                            | 1.67          | COG0266    | [L]                 |
| PB7211_1337, catalase/peroxidase HPI                                       | feature:167717770, catalase/peroxidase HPI                                        | 1.0808        | COG0376    | [P]                 |
| PB7211_1321, polysaccharide deacetylase                                    | feature:167717814, polysaccharide deacetylase                                     | 2.0428        | COG0726    | [G]                 |
| PB7211_1264, Sulfotransferase domain family protein                        | feature:167717858, Sulfotransferase domain family protein                         | 1.2428        | NA         | NA                  |
| PB7211_469, putative porin                                                 | feature:167717860, putative porin                                                 | 1.5338        | NA         | NA                  |
| PB7211_1272, riboflavin biosynthesis protein RibF                          | feature:167719302, Riboflavin biosynthesis protein                                | 2.0297        | COG0196    | [H]                 |
| PB7211_1446, lipid A biosynthesis lauroyl acyltransferase                  | feature:167719320, lipid A biosynthesis lauroyl acyltransferase                   | 1.0693        | COG1560    | [M]                 |
| PB7211_1330, tetraacyldisaccharide 4'-kinase                               | feature:167719322, tetraacyldisaccharide 4'-kinase                                | 1.0645        | COG1663    | [M]                 |
| PB7211_868, salicylate 1-monooxygenase                                     | feature:167719412, salicylate 1-monooxygenase                                     | 1.2038        | NA         | NA                  |
| PB7211_1100, prolipoprotein diacylglycerol transferase                     | feature:167719450, prolipoprotein diacylglycerol transferase                      | 2.8813        | COG0682    | [M]                 |
| PB7211_1203, O-Antigen Polymerase family protein                           | feature:167719510, O-antigen polymerase                                           | 1.4019        | NA         | NA                  |

|                                                                                            |                                                                                                    |        |         |       |
|--------------------------------------------------------------------------------------------|----------------------------------------------------------------------------------------------------|--------|---------|-------|
| PB7211_811, Diacylglycerol kinase catalytic domain protein, putative                       | feature:167719684, Diacylglycerol kinase catalytic domain protein, putative                        | 2.2579 | NA      | NA    |
| PB7211_970, TctA protein                                                                   | feature:167719730, integral membrane protein, putative                                             | 1.0108 | COG3333 | [S]   |
| PB7211_965, putative tricarboxylic transport TctC                                          | feature:167719734, exported protein, putative                                                      | 1.7508 | COG3181 | [S]   |
| PB7211_638, glycine/D-amino acid oxidase deaminating                                       | feature:167719742, hypothetical protein MED121_20906                                               | 2.0999 | COG0665 | [E]   |
| PB7211_1215, sugar fermentation stimulation protein                                        | feature:167719816, sugar fermentation stimulation protein                                          | 3.8764 | COG1489 | [R]   |
| PB7211_580, pantoate--beta-alanine ligase                                                  | feature:167719910, pantoate-beta-alanine ligase                                                    | 1.1087 | COG0414 | [H]   |
| PB7211_440, conserved hypothetical protein                                                 | feature:167720014, hypothetical protein SAR11_1038                                                 | 1.0161 | COG5452 | [S]   |
| PB7211_1401, glycosyl transferase, group 2 family                                          | feature:167720050, glycosyl transferase, group 2 family                                            | 2.2803 | COG1216 | [R]   |
| PB7211_49, glycosyl transferase family 8                                                   | feature:167774855, glycosyl transferase family 8                                                   | 1.1375 | NA      | NA    |
| PB7211_262, methyltransferase                                                              | feature:167818944, methyltransferase                                                               | 1.0035 | NA      | NA    |
| PB7211_986, ADP-ribosylglycohydrolase                                                      | feature:167818946, ADP-ribosylglycohydrolase                                                       | 2.5882 | NA      | NA    |
| PB7211_972, bacterial extracellular solute-binding protein, family 7                       | feature:167818958, TRAP dicarboxylate transporter- DctP subunit                                    | 1.2802 | COG1638 | [G]   |
| PB7211_1440, probable transcription regulatory protein                                     | feature:167819026, hypothetical protein SAR11_1248                                                 | 1.3527 | NA      | NA    |
| PB7211_644, ABC proline/glycine betaine transporter, periplasmic substrate-binding protein | feature:167819050, glycine betaine/L-proline ABC transporter,substrate-binding periplasmic protein | 1.2334 | COG2113 | [E]   |
| PB7211_88, ABC transporter, membrane spanning protein (glycine betaine)                    | feature:167819052, PA5095                                                                          | 2.5    | COG4176 | [E]   |
| PB7211_552, phosphoenolpyruvate carboxylase                                                | feature:167819194, putative phosphoenolpyruvate carboxylase                                        | 1.1113 | COG2352 | [C]   |
| PB7211_123, hypothetical protein                                                           | feature:167819374, Glycosyltransferase family 9 (heptosyltransferase)                              | 1.6466 | COG0859 | [M]   |
| PB7211_1161, membrane protein                                                              | feature:167819396, membrane protein                                                                | 1.4594 | COG2364 | [S]   |
| PB7211_132, phosphatidate cytidyltransferase                                               | feature:167888844, phosphatidate cytidyltransferase                                                | 1.2456 | COG0575 | [I]   |
| PB7211_625, UDP-3-O-(3-hydroxymyristoyl) glucosamine N-acyltransferase                     | feature:167888854, UDP-3-O-[3-hydroxymyristoyl] glucosamine N-acyltransferase                      | 1.0432 | COG1044 | [M]   |
| PB7211_158, drug/metabolite transporter                                                    | feature:167907248, DMT family permease                                                             | 1.0154 | COG0697 | [GER] |
| PB7211_244, phosphotransferase enzyme family protein                                       | feature:167907268, phosphotransferase enzyme family protein                                        | 1.0189 | COG3178 | [R]   |
| PB7211_1136, two-component sensor histidine kinase                                         | feature:167907274, two-component sensor histidine kinase                                           | 1.0954 | COG0642 | [T]   |

|                                                      |                                                             |        |         |      |
|------------------------------------------------------|-------------------------------------------------------------|--------|---------|------|
| PB7211_401, acid tolerance regulatory protein actr   | feature:167907284, response regulator                       | 1.2681 | COG4567 | [TK] |
| PB7211_1162, D-lactate dehydrogenase (cytochrome)    | feature:167907448, (S)-2-hydroxy-acid oxidase               | 1.3169 | COG0277 | [C]  |
| PB7211_1296, homocysteine S-methyltransferase        | feature:167907494, betaine-homocysteine methyltransferase   | 1.0481 | COG0646 | [E]  |
| PB7211_114, bifunctional purine biosynthesis protein | feature:167907536, bifunctional purine biosynthesis protein | 1.5277 | COG0138 | [F]  |
| PB7211_999, putative Sulfotransferase domain protein | feature:167907540, putative Sulfotransferase domain protein | 1.2712 | NA      | NA   |

**Genes with signatures of positive selection in IMCC9063 vs HIMB114**

| <b>HIMB114 gene number &amp; annotation</b>                                                                    | <b>IMCC9063 gene identifier &amp; annotation</b>                                              | <b>dN/dS*</b> | <b>COG</b> | <b>COG Category</b> |
|----------------------------------------------------------------------------------------------------------------|-----------------------------------------------------------------------------------------------|---------------|------------|---------------------|
| HIMB114_0965, penicillin-binding protein 2                                                                     | SAR11G3_00024, penicillin-binding protein 2 (PBP-2)                                           | 1.0483        | COG0768    | [M]                 |
| HIMB114_0990, putative uNdecaprenyl-phosphate-alpha-n-acetylglucosaminyltransferase                            | SAR11G3_00039, undecaprenyl-phosphate N-acetylglucosaminyl 1-phosphate transferase            | 1.3074        | NA         | NA                  |
| HIMB114_0991, putative O-Antigen Polymerase                                                                    | SAR11G3_00040, O-Antigen Polymerase                                                           | 1.3288        | NA         | NA                  |
| HIMB114_0993, putative glycosyltransferase                                                                     | SAR11G3_00070, glycosyl transferase family protein, putative                                  | 3.0041        | COG0463    | [M]                 |
| HIMB114_0989, nucleotidyl transferase                                                                          | SAR11G3_00113, D-glycero-D-mannoheptose 1-phosphate guanosyltransferase                       | 1.6271        | COG1208    | [MJ]                |
| HIMB114_1044, mutator MutT protein                                                                             | SAR11G3_00148, 5-methyl-dCTP pyrophosphohydrolase                                             | 1.1454        | COG0494    | [LR]                |
| HIMB114_1046, acetyl-CoA carboxylase, carboxyl transferase, alpha subunit                                      | SAR11G3_00151, acetyl-coenzyme A carboxyl transferase alpha chain                             | 1.0629        | COG0825    | [I]                 |
| HIMB114_1048, hypothetical protein                                                                             | SAR11G3_00153, hypothetical protein                                                           | 1.5092        | NA         | NA                  |
| HIMB114_1096, hypothetical protein                                                                             | SAR11G3_00203, hypothetical protein                                                           | 1.6464        | NA         | NA                  |
| HIMB114_0761, type 4 fimbrial assembly protein PilB                                                            | SAR11G3_00220, type II secretory pathway, ATPase PulE/Tfp pilus assembly pathway, ATPase PilB | 1.6743        | COG2804    | [NU]                |
| HIMB114_0762, putative outer membrane protein                                                                  | SAR11G3_00221, hypothetical protein                                                           | 1.8769        | COG4796    | [U]                 |
| HIMB114_0883, conserved hypothetical protein                                                                   | SAR11G3_00226, hypothetical protein                                                           | 1.2802        | NA         | NA                  |
| HIMB114_0765, twitching motility protein                                                                       | SAR11G3_00237, twitching motility protein PilT                                                | 1.242         | COG2805    | [NU]                |
| HIMB114_1138, putative membrane-bound pili assembly protein Fimc                                               | SAR11G3_00284, putative membrane-bound pili assembly protein Fimc                             | 1.3821        | NA         | NA                  |
| HIMB114_0187, omega-amino acid--pyruvate aminotransferase (Omega-APT)(Beta-alanine--pyruvate aminotransferase) | SAR11G3_00289, omega-amino acid--pyruvate aminotransferase                                    | 1.3953        | COG0161    | [H]                 |
| HIMB114_1415, major facilitator superfamily protein                                                            | SAR11G3_00290, putative MFS transporter (Major Facilitator Superfamily)                       | 1.0301        | COG0477    | [GEPR]              |



|                                                                                                                                       |                                                                                             |        |         |       |
|---------------------------------------------------------------------------------------------------------------------------------------|---------------------------------------------------------------------------------------------|--------|---------|-------|
| HIMB114_1150, conserved hypothetical protein                                                                                          | SAR11G3_00297, thiosulfate sulfurtransferase, rhodanese                                     | 1.0576 | COG2897 | [P]   |
| HIMB114_1163, ABC transporter, ATP-binding protein                                                                                    | SAR11G3_00311, ABC transporter, ATP-binding protein                                         | 1.7968 | COG1131 | [V]   |
| HIMB114_1171, putative DNA replication and repair protein RecF                                                                        | SAR11G3_00320, DNA recombination and repair protein RecF                                    | 1.1476 | NA      | NA    |
| HIMB114_1178, phosphopantothencysteine decarboxylase/phosphopantothencysteine ligase                                                  | SAR11G3_00328, phosphopantothencysteine decarboxylase / Phosphopantothencysteine synthetase | 1.811  | COG0452 | [H]   |
| HIMB114_0722, apolipoprotein N-acyltransferase                                                                                        | SAR11G3_00345, apolipoprotein N-acyltransferase                                             | 1.0882 | NA      | NA    |
| HIMB114_1194, conserved hypothetical protein                                                                                          | SAR11G3_00347, metal-dependent hydrolase                                                    | 1.4376 | COG0319 | [R]   |
| HIMB114_0558, uroporphyrinogen decarboxylase (URO-D) (UPD)                                                                            | SAR11G3_00394, uroporphyrinogen III decarboxylase                                           | 2.4278 | COG0407 | [H]   |
| HIMB114_1246, probable Smr                                                                                                            | SAR11G3_00403, putative Smr (Small MutS Related) protein                                    | 1.0497 | NA      | NA    |
| HIMB114_1238, putative outer membrane lipoprotein carrier protein                                                                     | SAR11G3_00413, hypothetical protein                                                         | 3.2924 | NA      | NA    |
| HIMB114_1291, hypothetical protein                                                                                                    | SAR11G3_00439, hypothetical protein                                                         | 1.358  | NA      | NA    |
| HIMB114_1295, cytochrome c-type biogenesis protein CcmF                                                                               | SAR11G3_00444, cytochrome c heme lyase subunit CcmF                                         | 1.0139 | COG1138 | [O]   |
| HIMB114_1299, lipid A 3-O-deacylase (PagL) superfamily                                                                                | SAR11G3_00447, hypothetical protein                                                         | 1.4959 | NA      | NA    |
| HIMB114_1303, FAD linked oxidase domain protein                                                                                       | SAR11G3_00451, glycolate dehydrogenase, FAD-binding subunit GlcE                            | 1.295  | COG0277 | [C]   |
| HIMB114_1329, aspartate-semialdehyde dehydrogenase                                                                                    | SAR11G3_00471, aspartate-semialdehyde dehydrogenase                                         | 1.6153 | COG0136 | [E]   |
| HIMB114_1333, oxoglutarate dehydrogenase (succinyl-transferring), E1 component                                                        | SAR11G3_00480, 2-oxoglutarate dehydrogenase E1 component                                    | 1.0675 | COG0567 | [C]   |
| HIMB114_0986, transaldolase                                                                                                           | SAR11G3_00483, transaldolase                                                                | 1.0517 | COG0176 | [G]   |
| HIMB114_1346, putative nicotinate-nucleotide adenyltransferase                                                                        | SAR11G3_00495, putative nicotinate-nucleotide adenyltransferase                             | 1.0708 | COG1057 | [H]   |
| HIMB114_1356, histidinol-phosphate aminotransferase (Imidazole acetol-phosphate transaminase)                                         | SAR11G3_00505, histidinol-phosphate aminotransferase                                        | 3.8665 | COG0079 | [E]   |
| HIMB114_1373, transcriptional regulator, CarD family                                                                                  | SAR11G3_00522, carD-like transcriptional regulator                                          | 1.0069 | COG1329 | [K]   |
| HIMB114_1376, ATP-dependent helicase                                                                                                  | SAR11G3_00525, ATP-dependent DNA helicase                                                   | 1.0874 | COG0513 | [LKJ] |
| HIMB114_1383, 3-deoxy-manno-octulosonate cytidyltransferase (CMP-KDOsynthetase) (CMP-2-keto-3-deoxyoctulosonic acid synthetase) (CKS) | SAR11G3_00534, 3-deoxy-manno-octulosonate cytidyltransferase                                | 1.0777 | COG1212 | [M]   |
| HIMB114_1398, 60 kDa inner membrane insertion protein                                                                                 | SAR11G3_00546, inner membrane protein translocase component YidC, long form                 | 1.0934 | COG0706 | [U]   |

|                                                                                                                                 |                                                                                      |        |         |      |
|---------------------------------------------------------------------------------------------------------------------------------|--------------------------------------------------------------------------------------|--------|---------|------|
| HIMB114_0124, folylpolyglutamate synthase                                                                                       | SAR11G3_00584, dihydrofolate synthase / Folylpolyglutamate synthase                  | 1.1114 | COG0285 | [H]  |
| HIMB114_0125, acetyl-coenzyme A carboxylase carboxyl transferase subunit beta (ACCcase beta chain)                              | SAR11G3_00585, acetyl-coenzyme A carboxyl transferase beta chain                     | 1.0386 | COG0777 | [I]  |
| HIMB114_0158, putative glycosyl transferase                                                                                     | SAR11G3_00617, glycosyl transferase, group 2 family protein                          | 1.5765 | NA      | NA   |
| HIMB114_0161, beta-lactamase                                                                                                    | SAR11G3_00619, esterase                                                              | 1.0828 | COG1680 | [V]  |
| HIMB114_0163, pyruvate dehydrogenase (acetyl-transferring), homodimeric type                                                    | SAR11G3_00622, pyruvate dehydrogenase E1 component                                   | 1.1217 | COG2609 | [C]  |
| HIMB114_0176, septum formation protein Maf                                                                                      | SAR11G3_00635, septum formation protein Maf                                          | 1.3608 | COG0424 | [D]  |
| HIMB114_0193, RNA methyltransferase, RsmD family                                                                                | SAR11G3_00651, ribosomal RNA small subunit methyltransferase D                       | 1.5166 | NA      | NA   |
| HIMB114_0200, lipid A biosynthesis lauroyl acyltransferase                                                                      | SAR11G3_00659, lipid A biosynthesis lauroyl acyltransferase                          | 1.1711 | COG1560 | [M]  |
| HIMB114_0202, tetraacyldisaccharide 4'-kinase                                                                                   | SAR11G3_00660, 3-deoxy-D-manno-octulosonic-acid transferase                          | 1.2561 | COG1663 | [M]  |
| HIMB114_0218, homoserine kinase                                                                                                 | SAR11G3_00686, 4-hydroxy-3-methylbut-2-enyl diphosphate reductase                    | 1.051  | COG2334 | [R]  |
| HIMB114_0890, putative transmembrane protein                                                                                    | SAR11G3_00688, putative transmembrane protein                                        | 1.4711 | NA      | NA   |
| HIMB114_0225, chromosome segregation protein SMC                                                                                | SAR11G3_00699, chromosome partition protein smc                                      | 3.2042 | COG1196 | [D]  |
| HIMB114_0228, A/G-specific adenine glycosylase                                                                                  | SAR11G3_00703, A/G-specific adenine glycosylase                                      | 1.4059 | COG1194 | [L]  |
| HIMB114_0230, putative salicylate 1-monooxygenase                                                                               | SAR11G3_00704, salicylate hydroxylase                                                | 1.3615 | COG0654 | [HC] |
| HIMB114_0232, uracil DNA glycosylase superfamily                                                                                | SAR11G3_00707, uracil-DNA glycosylase, family 4                                      | 1.0421 | COG1573 | [L]  |
| HIMB114_0233, putative tetratricopeptide repeat protein                                                                         | SAR11G3_00708, conserved hypothetical protein; putative TPR repeat domain            | 1.2818 | COG0457 | [R]  |
| HIMB114_0234, 4-diphosphocytidyl-2-C-methyl-D-erythritol kinase (CMK)(4-(cytidine-5'-diphospho)-2-C-methyl-D-erythritol kinase) | SAR11G3_00709, 4-diphosphocytidyl-2-C-methyl-D-erythritol kinase                     | 1.1503 | NA      | NA   |
| HIMB114_0247, putative cyclopropane-fatty-acyl-phospholipid synthase                                                            | SAR11G3_00723, conserved hypothetical protein                                        | 2.1235 | NA      | NA   |
| HIMB114_0260, conserved hypothetical protein                                                                                    | SAR11G3_00737, DUF1022 domain-containing protein                                     | 1.1488 | COG3660 | [M]  |
| HIMB114_0265, DNA primase                                                                                                       | SAR11G3_00742, DNA primase                                                           | 1.1256 | COG0358 | [L]  |
| HIMB114_0274, cell division protein FtsZ                                                                                        | SAR11G3_00749, cell division protein FtsZ                                            | 1.1549 | COG0206 | [D]  |
| HIMB114_0278, UDP-N-acetylmuramoyl-L-alanyl-D-glutamate--2, 6-diaminopimelate ligase                                            | SAR11G3_00753, UDP-N-acetylmuramoyl-L-alanyl-D-glutamate--2,6-diaminopimelate ligase | 1.284  | COG0769 | [M]  |
| HIMB114_0286, conserved hypothetical protein                                                                                    | SAR11G3_00764, hypothetical protein                                                  | 1.2103 | NA      | NA   |

|                                                                                |                                                                                                                           |        |         |      |
|--------------------------------------------------------------------------------|---------------------------------------------------------------------------------------------------------------------------|--------|---------|------|
| HIMB114_0287, cell division protein FtsA                                       | SAR11G3_00765, cell division protein FtsA                                                                                 | 1.1601 | NA      | NA   |
| HIMB114_0293, hypothetical protein                                             | SAR11G3_00774, hypothetical protein                                                                                       | 1.5466 | NA      | NA   |
| HIMB114_0317, putative transcriptional regulator, IclR family                  | SAR11G3_00798, transcriptional regulator, IclR family                                                                     | 3.4672 | NA      | NA   |
| HIMB114_0384, putative phosphoserine phosphatase                               | SAR11G3_00848, phosphoserine phosphatase                                                                                  | 1.1134 | COG0560 | [E]  |
| HIMB114_0416, transporter major facilitator superfamily MFS_1                  | SAR11G3_00876, putative membrane permease of unknown function                                                             | 1.0186 | NA      | NA   |
| HIMB114_0833, alanyl-tRNA synthetase                                           | SAR11G3_00906, alanyl-tRNA synthetase                                                                                     | 1.1745 | COG0013 | [J]  |
| HIMB114_0806, hypothetical protein                                             | SAR11G3_00939, outer membrane protein Imp, required for envelope biogenesis / Organic solvent tolerance protein precursor | 1.3512 | COG1452 | [M]  |
| HIMB114_0805, putative permease, YjgP/YjgQ family                              | SAR11G3_00940, putative permease YjgP/YjgQ family protein                                                                 | 1.1595 | NA      | NA   |
| HIMB114_0799, hypothetical protein                                             | SAR11G3_00947, putative membrane protein                                                                                  | 1.5301 | NA      | NA   |
| HIMB114_0797, probable ATPase involved in DNA replication initiation           | SAR11G3_00948, chromosomal replication initiator protein DnaA                                                             | 1.1275 | NA      | NA   |
| HIMB114_0114, conserved hypothetical protein                                   | SAR11G3_00977, hypothetical protein                                                                                       | 1.5491 | NA      | NA   |
| HIMB114_0858, probable nicotinate-nucleotide pyrophosphorylase [carboxylating] | SAR11G3_00996, quinolinate phosphoribosyltransferase/decarboxylase                                                        | 1.0814 | COG0157 | [H]  |
| HIMB114_1100, immunogenic protein                                              | SAR11G3_01000, TRAP transporter solute receptor, TAXI family precursor                                                    | 1.0421 | COG2358 | [R]  |
| HIMB114_0714, NADH dehydrogenase (quinone), g subunit                          | SAR11G3_01013, NADH-ubiquinone oxidoreductase chain G                                                                     | 1.6723 | COG1034 | [C]  |
| HIMB114_0701, ABC transporter                                                  | SAR11G3_01029, lipoprotein releasing system transmembrane protein LolC                                                    | 2.0175 | COG4591 | [M]  |
| HIMB114_0699, DNA polymerase III subunit alpha                                 | SAR11G3_01031, DNA polymerase III alpha subunit                                                                           | 1.3333 | COG0587 | [L]  |
| HIMB114_0694, phosphatidate cytidyltransferase                                 | SAR11G3_01036, phosphatidate cytidyltransferase                                                                           | 1.0445 | COG0575 | [I]  |
| HIMB114_0693, 1-deoxy-D-xylulose 5-phosphate reductoisomerase                  | SAR11G3_01038, 1-deoxy-D-xylulose 5-phosphate reductoisomerase                                                            | 2.1952 | COG0743 | [I]  |
| HIMB114_0692, outer membrane protein assembly complex, YaeT protein            | SAR11G3_01039, outer membrane protein assembly factor YaeT precursor                                                      | 1.4305 | NA      | NA   |
| HIMB114_0688, conserved hypothetical protein                                   | SAR11G3_01045, hypothetical protein                                                                                       | 6.5561 | COG3494 | [S]  |
| HIMB114_0687, lipid-A-disaccharide synthase                                    | SAR11G3_01046, lipid-A-disaccharide synthase                                                                              | 1.2279 | COG0763 | [M]  |
| HIMB114_0680, anthranilate synthase component I                                | SAR11G3_01055, hypothetical SurA-like protein                                                                             | 1.0698 | COG0147 | [EH] |
| HIMB114_0679, hypothetical protein                                             | SAR11G3_01056, hypothetical SurA-like protein                                                                             | 1.3423 | NA      | NA   |
| HIMB114_0678, triose-phosphate isomerase                                       | SAR11G3_01058, triosephosphate isomerase                                                                                  | 3.1289 | COG0149 | [G]  |

|                                                                                |                                                                                             |        |         |      |
|--------------------------------------------------------------------------------|---------------------------------------------------------------------------------------------|--------|---------|------|
| HIMB114_0664, putative membrane protein                                        | SAR11G3_01075, trkH-like cation transport protein                                           | 1.7126 | NA      | NA   |
| HIMB114_0659, conserved hypothetical protein                                   | SAR11G3_01083, conserved hypothetical protein                                               | 1.177  | NA      | NA   |
| HIMB114_0653, valyl-tRNA synthetase                                            | SAR11G3_01089, valyl-tRNA synthetase                                                        | 1.0367 | COG0525 | [J]  |
| HIMB114_0636, putative lipoprotein                                             | SAR11G3_01110, hypothetical protein                                                         | 1.5106 |         |      |
| HIMB114_0616, protein-export membrane protein SecD                             | SAR11G3_01130, protein-export membrane protein SecD                                         | 1.3136 | COG0342 | [U]  |
| HIMB114_0630, glycosyl transferase group 1                                     | SAR11G3_01144, putative hexosyltransferase                                                  | 1.2026 | COG0438 | [M]  |
| HIMB114_0633, putative DNA polymerase III                                      | SAR11G3_01147, DNA polymerase III delta prime subunit                                       | 1.0547 | COG0470 | [L]  |
| HIMB114_0583, riboflavin synthase, alpha subunit                               | SAR11G3_01155, riboflavin synthase alpha chain                                              | 1.0005 | COG0307 | [H]  |
| HIMB114_0577, DNA gyrase subunit A                                             | SAR11G3_01164, topoisomerase IV subunit A                                                   | 1.2291 | COG0188 | [L]  |
| HIMB114_0571, pyridoxal phosphate biosynthesis protein PdxJ                    | SAR11G3_01171, pyridoxine 5'-phosphate synthase                                             | 1.2895 | COG0854 | [H]  |
| HIMB114_0564, putative soluble lytic murein transglycosylase                   | SAR11G3_01177, soluble lytic murein transglycosylase precursor                              | 1.6949 | COG0741 | [M]  |
| HIMB114_0533, pantoate--beta-alanine ligase                                    | SAR11G3_01195, pantoate--beta-alanine ligase                                                | 1.0448 | COG0414 | [H]  |
| HIMB114_0532, ribosomal large subunit pseudouridine synthase C                 | SAR11G3_01198, crcB-like protein                                                            | 1.4439 | COG0564 | [J]  |
| HIMB114_0487, putative porin                                                   | SAR11G3_01240, putative porin                                                               | 1.252  | NA      | NA   |
| HIMB114_1132, histone deacetylase family protein                               | SAR11G3_01303, histone deacetylase family protein                                           | 1.4163 | COG0123 | [BQ] |
| HIMB114_1467, conserved hypothetical protein                                   | SAR11G3_01317, hypothetical protein                                                         | 1.0859 | NA      | NA   |
| HIMB114_0776, SUF system FeS assembly protein, NifU family                     | SAR11G3_01324, putative iron-sulfur cluster assembly scaffold protein for SUF system, SufE2 | 1.4051 | COG0822 | [C]  |
| HIMB114_0778, FeS assembly protein SufD                                        | SAR11G3_01326, iron-sulfur cluster assembly protein SufD                                    | 1.2291 | COG0719 | [O]  |
| HIMB114_0781, anhydro-N-acetylmuramic acid kinase                              | SAR11G3_01330, anhydro-N-acetylmuramic acid kinase                                          | 1.0901 | COG2377 | [O]  |
| HIMB114_0784, conserved hypothetical protein                                   | SAR11G3_01332, hypothetical protein                                                         | 1.5917 | NA      | NA   |
| HIMB114_0785, peptide chain release factor 2                                   | SAR11G3_01333, peptide chain release factor 2                                               | 1.2872 | COG1186 | [J]  |
| HIMB114_0786, penicillin-binding protein 1A                                    | SAR11G3_01334, multimodular transpeptidase-transglycosylase                                 | 1.3044 | COG5009 | [M]  |
| HIMB114_0787, ribonuclease E                                                   | SAR11G3_01335, cytoplasmic axial filament protein CafA and Ribonuclease G                   | 1.1753 | COG1530 | [J]  |
| HIMB114_0899, glycine betaine/L-proline transport system permease protein ProW | SAR11G3_01363, L-proline glycine betaine ABC transport system permease protein ProW         | 1.5242 | COG4176 | [E]  |
| HIMB114_0356, ferric uptake regulation protein                                 | SAR11G3_01369, zinc uptake regulation protein ZUR                                           | 1.0975 | COG0735 | [P]  |
| HIMB114_0874, pyrroline-5-carboxylate reductase                                | SAR11G3_01381, pyrroline-5-carboxylate reductase                                            | 2.2476 | COG0345 | [E]  |

|                                                                                                                     |                                                                           |        |         |     |
|---------------------------------------------------------------------------------------------------------------------|---------------------------------------------------------------------------|--------|---------|-----|
| HIMB114_0881, hypothetical protein                                                                                  | SAR11G3_01394, hypothetical protein                                       | 1.4347 | NA      | NA  |
| HIMB114_0929, thiamine-phosphate pyrophosphorylase (TMPpyrophosphorylase) (TMP-PPase) (Thiamine-phosphate synthase) | SAR11G3_01434, thiamin-phosphate pyrophosphorylase                        | 1.0194 | COG0352 | [H] |
| HIMB114_0935, AIR carboxylase                                                                                       | SAR11G3_01441, phosphoribosylaminoimidazole carboxylase catalytic subunit | 1.0747 | COG0041 | [F] |
| HIMB114_0938, hypothetical protein                                                                                  | SAR11G3_01444, hypothetical protein                                       | 1.0427 | NA      | NA  |
| HIMB114_0939, putative rod shape-determining protein MreC                                                           | SAR11G3_01445, rod shape-determining protein MreC                         | 1.4622 | NA      | NA  |
